# Supplementary material for: Diversity of Eukaryotic DNA Replication Origins Revealed by Genome-Wide Analysis of Chromatin Structure
Source: PubMed Central journal article supplement (PMC2932696; doi:10.1371/journal.pgen.1001092), 2010-09-02
Supplement: pgen.1001092.s001.pdf [file pgen.1001092.s001.pdf]

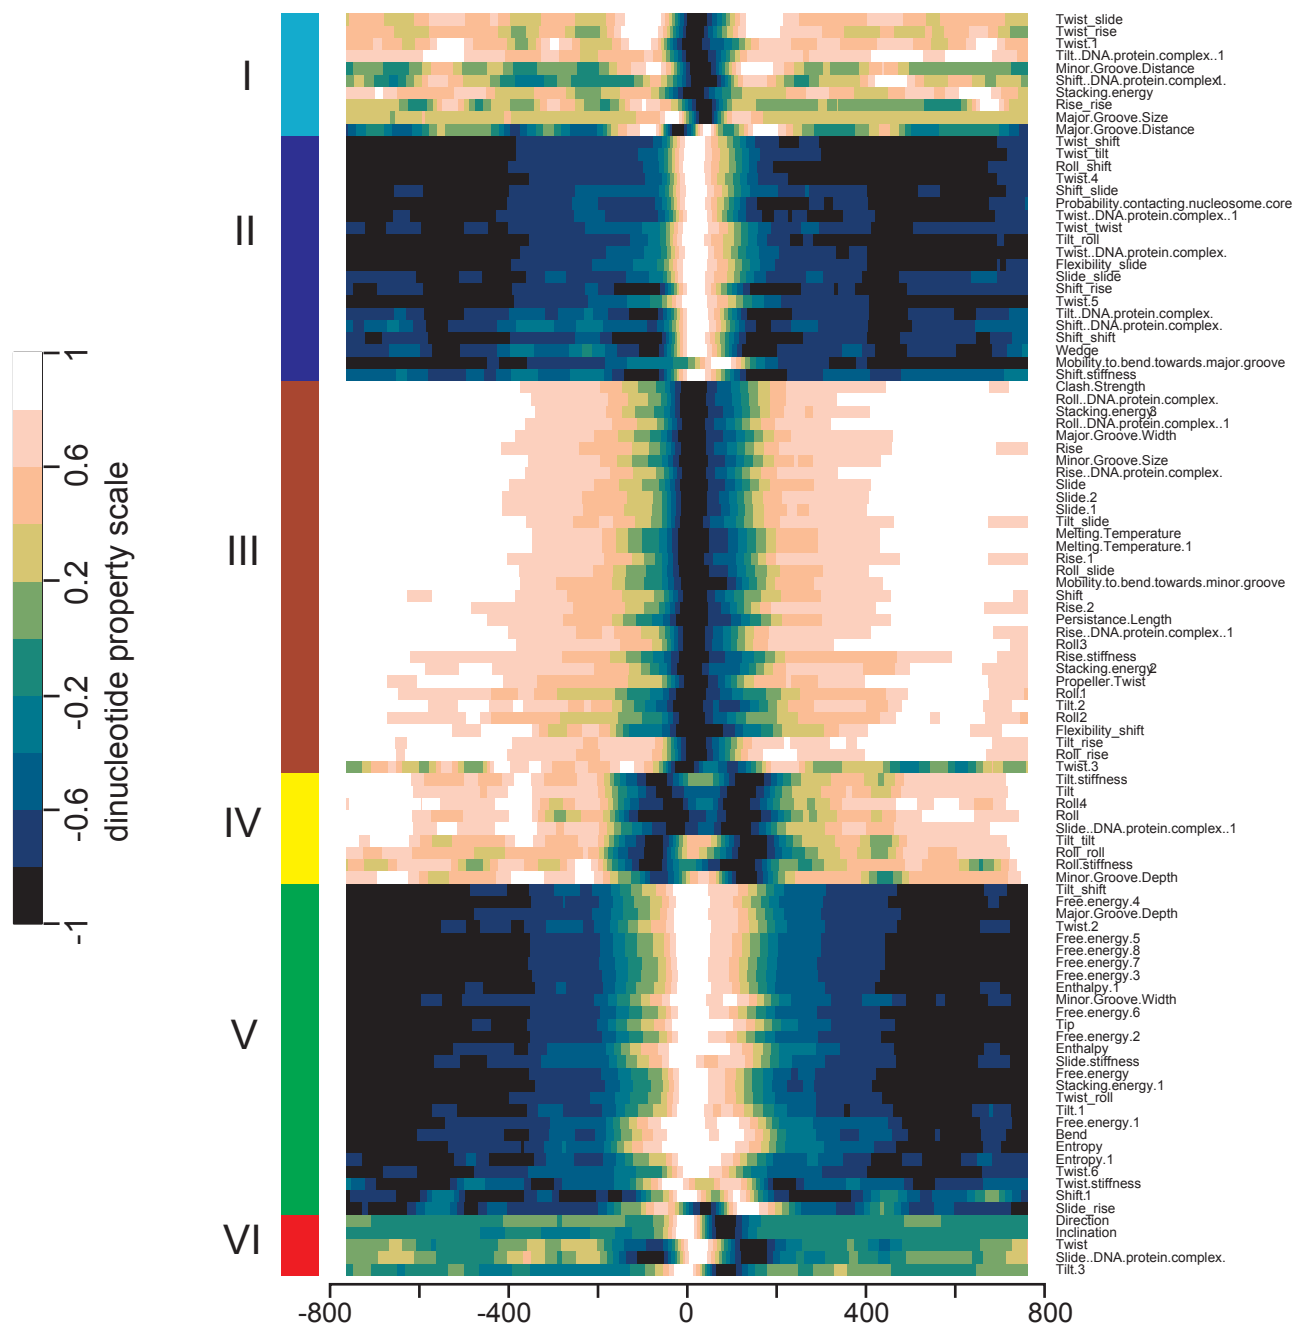

Figure S1: Heatmap of 103 DNA dinucleotide properties clustered into 6 groups using k-means clustering. Each average DNA dinucleotide profile was rescaled into the range -1 to 1, LOESS smoothed, and then clustered using k-means clustering (k=6) following 10000 iterations.
