# Supplementary material for: Diversity of Eukaryotic DNA Replication Origins Revealed by Genome-Wide Analysis of Chromatin Structure
Source: PubMed Central journal article supplement (PMC2932696; doi:10.1371/journal.pgen.1001092), 2010-09-02
Supplement: pgen.1001092.s003.pdf [file pgen.1001092.s003.pdf]

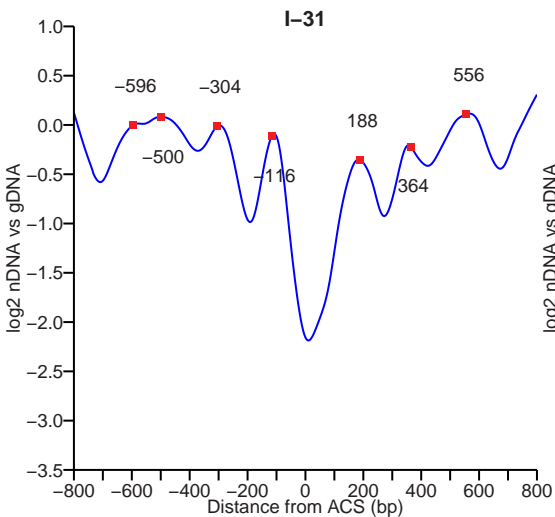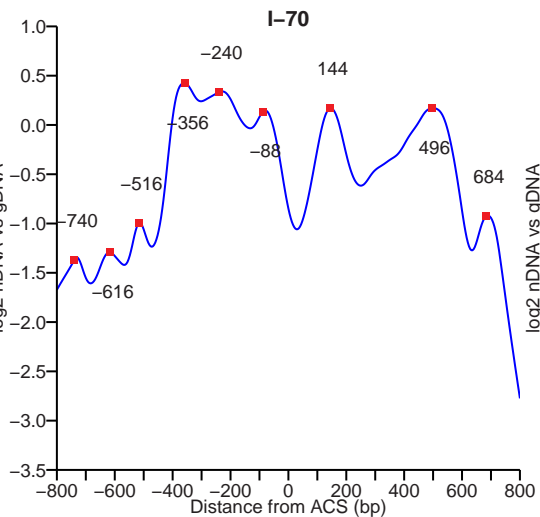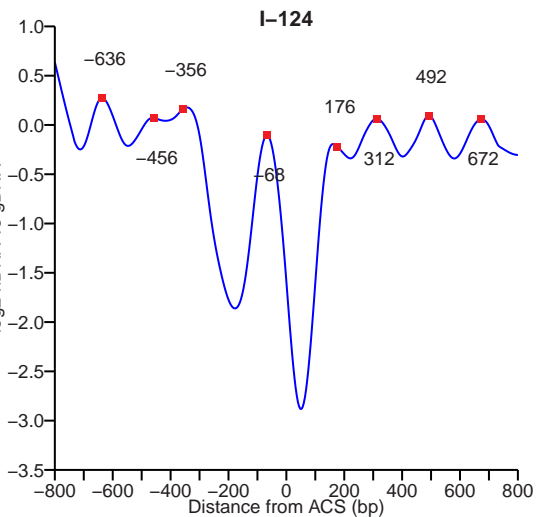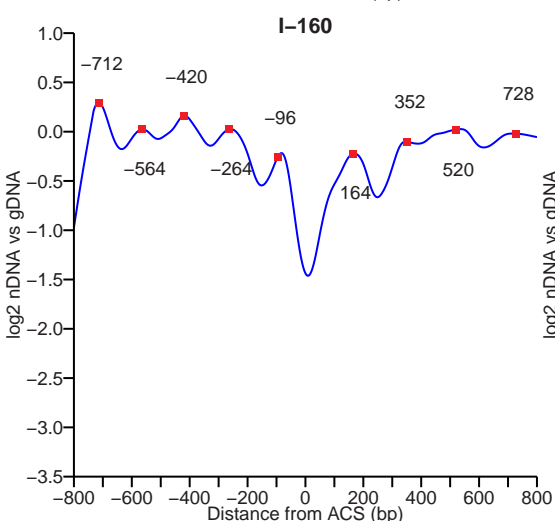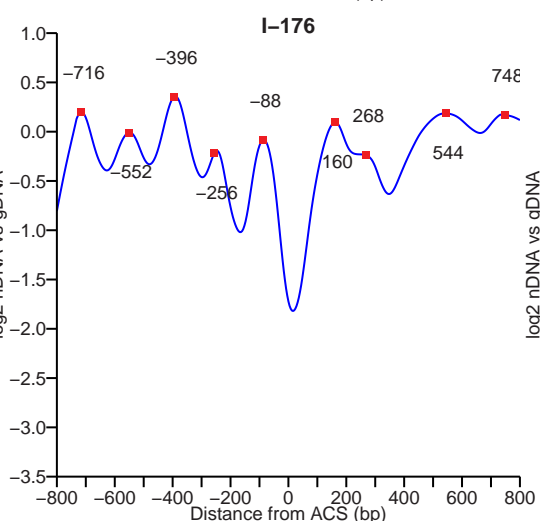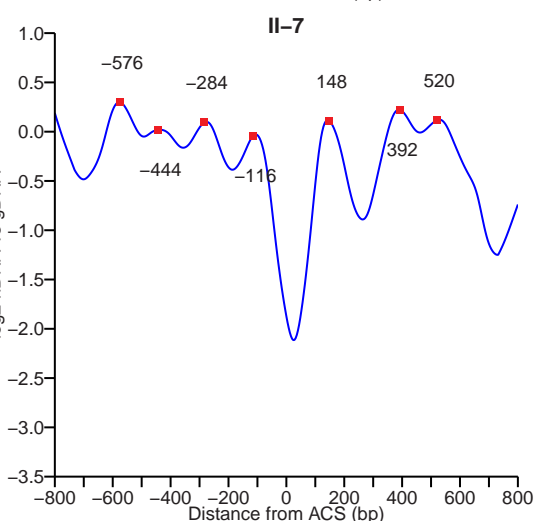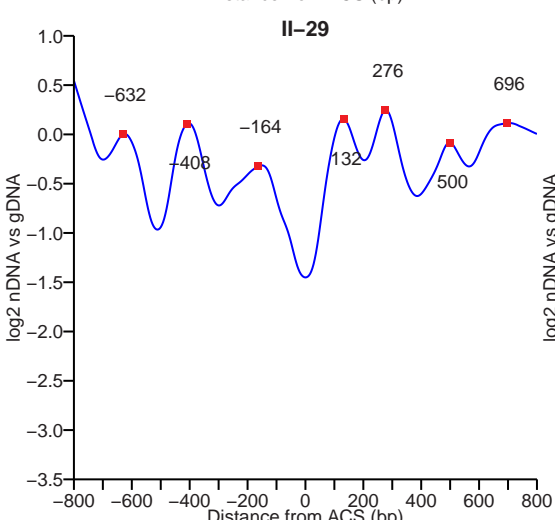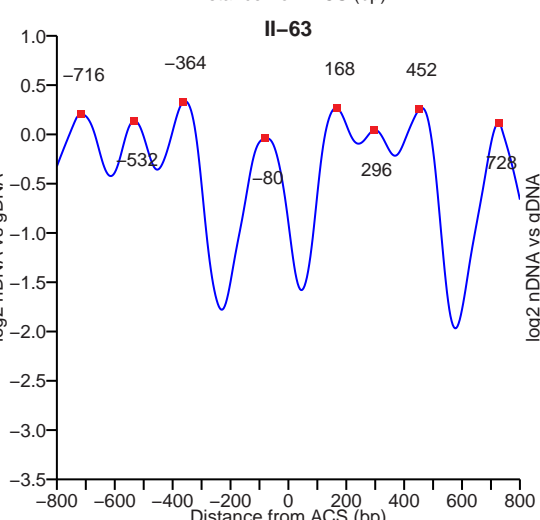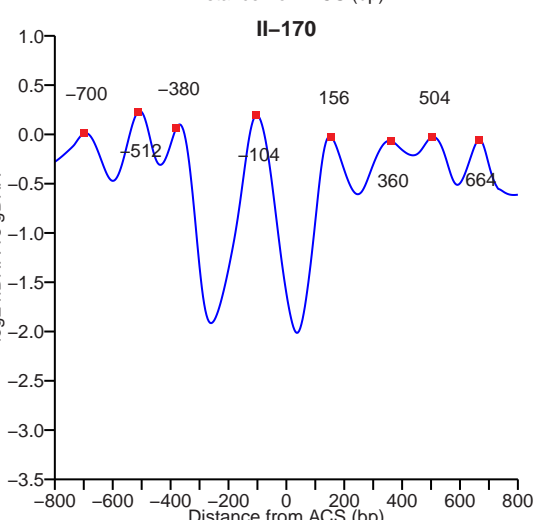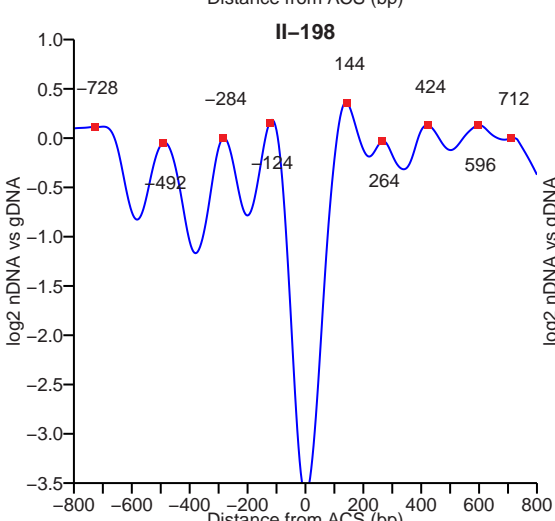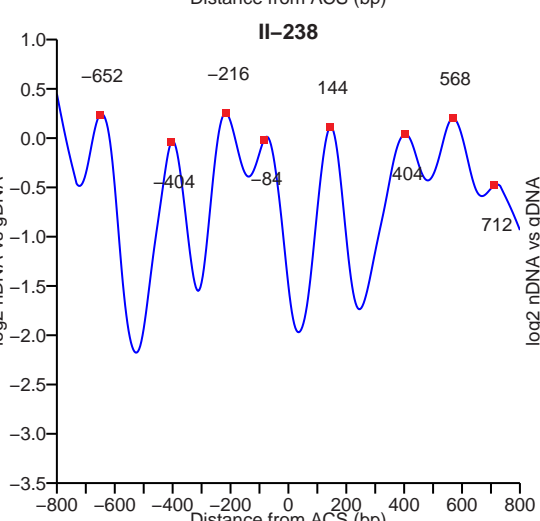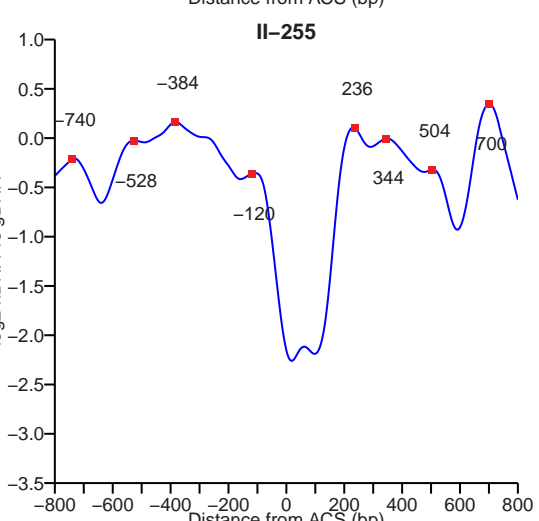

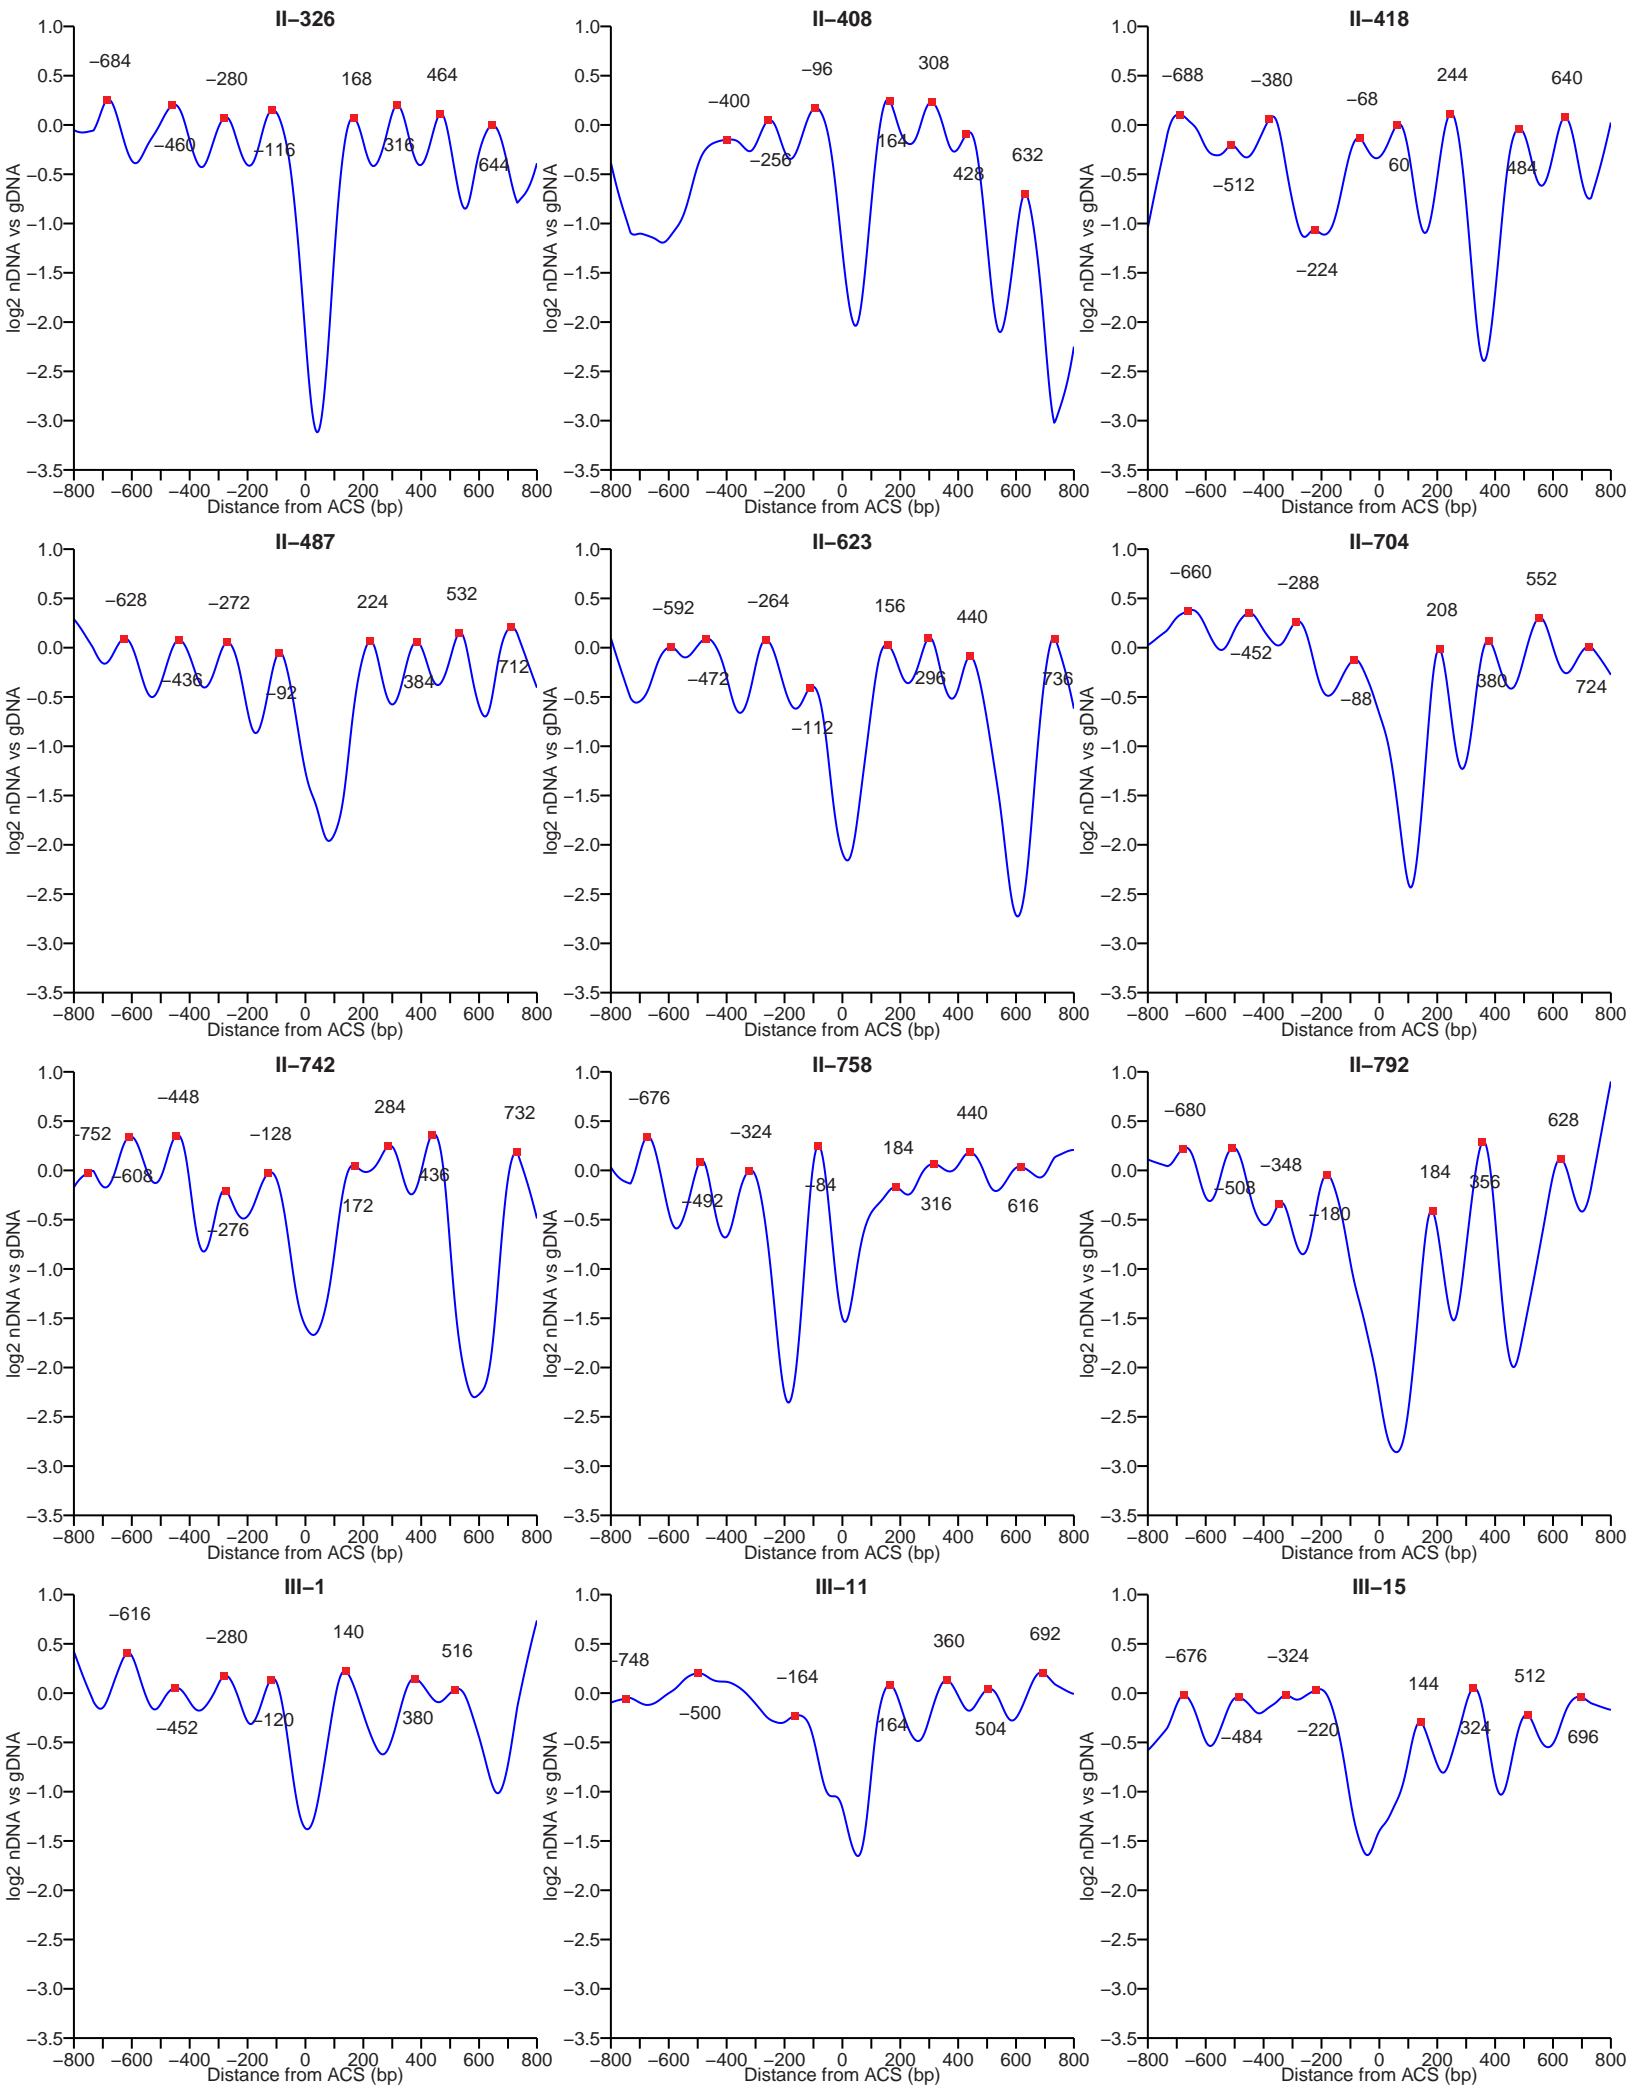

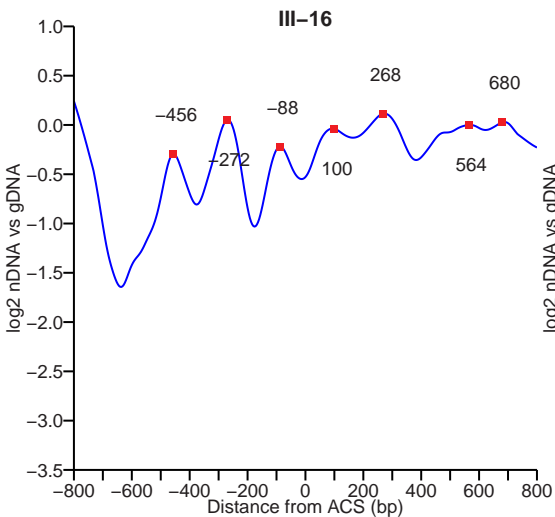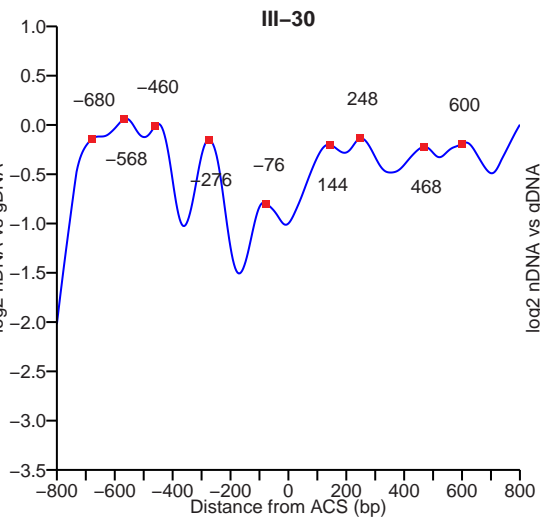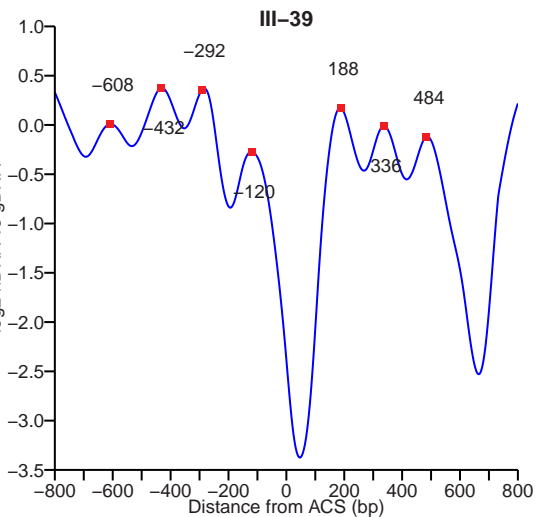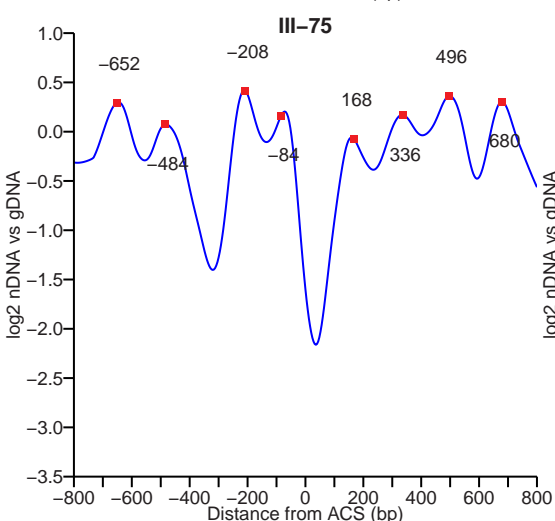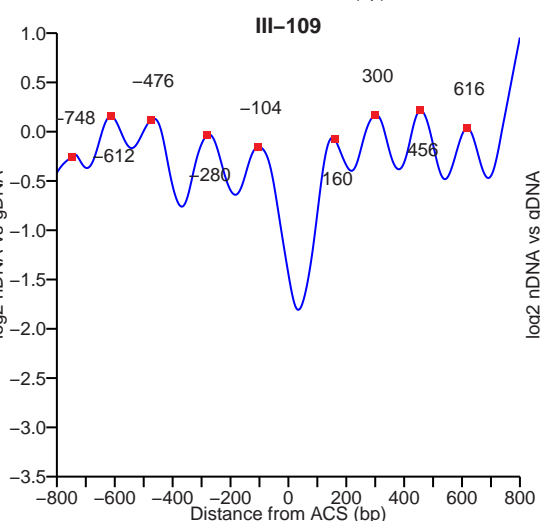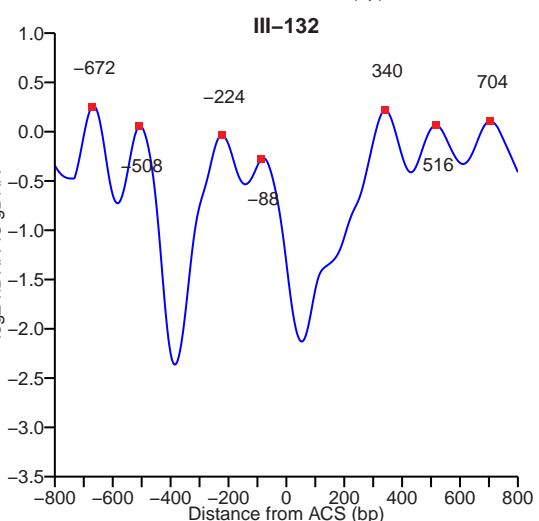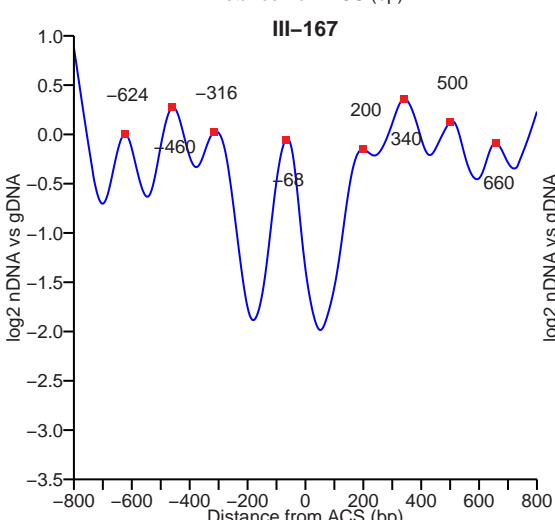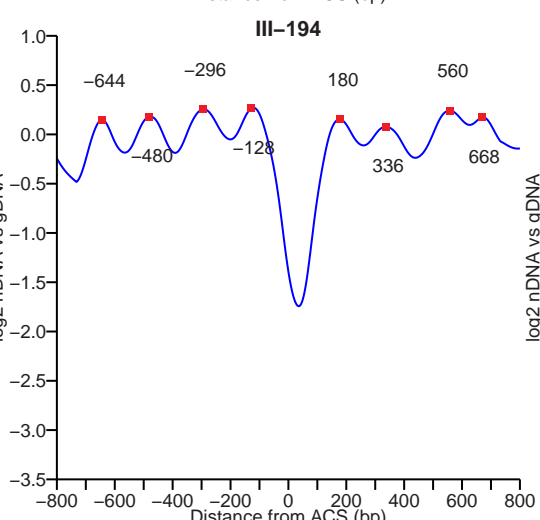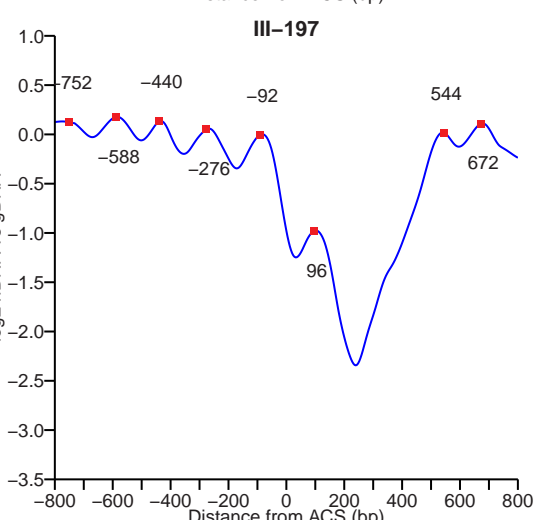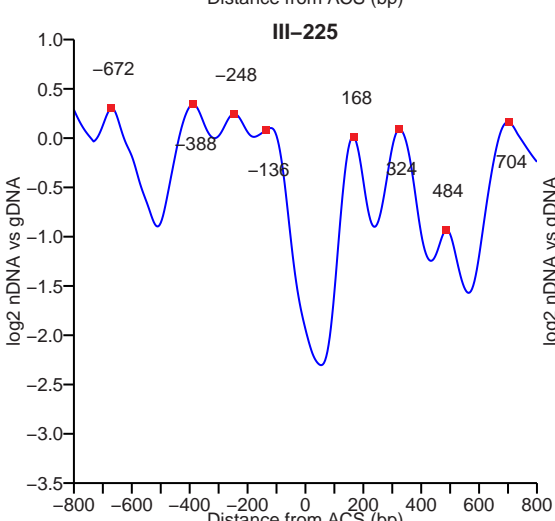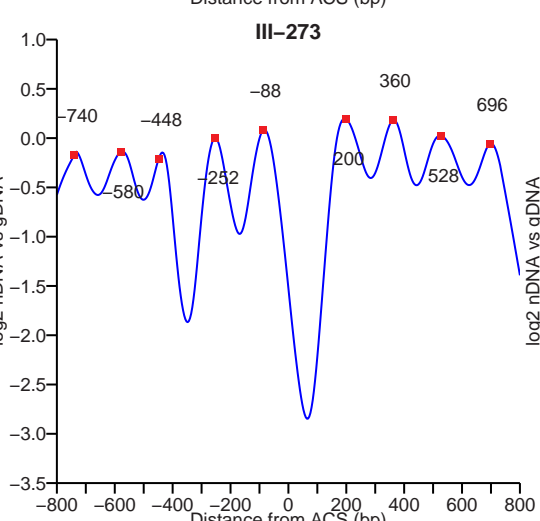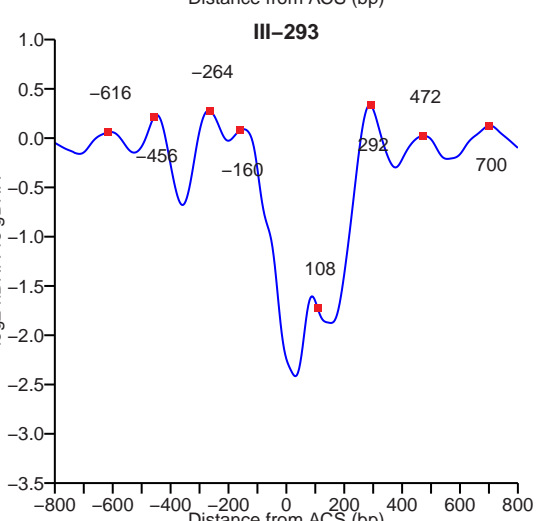

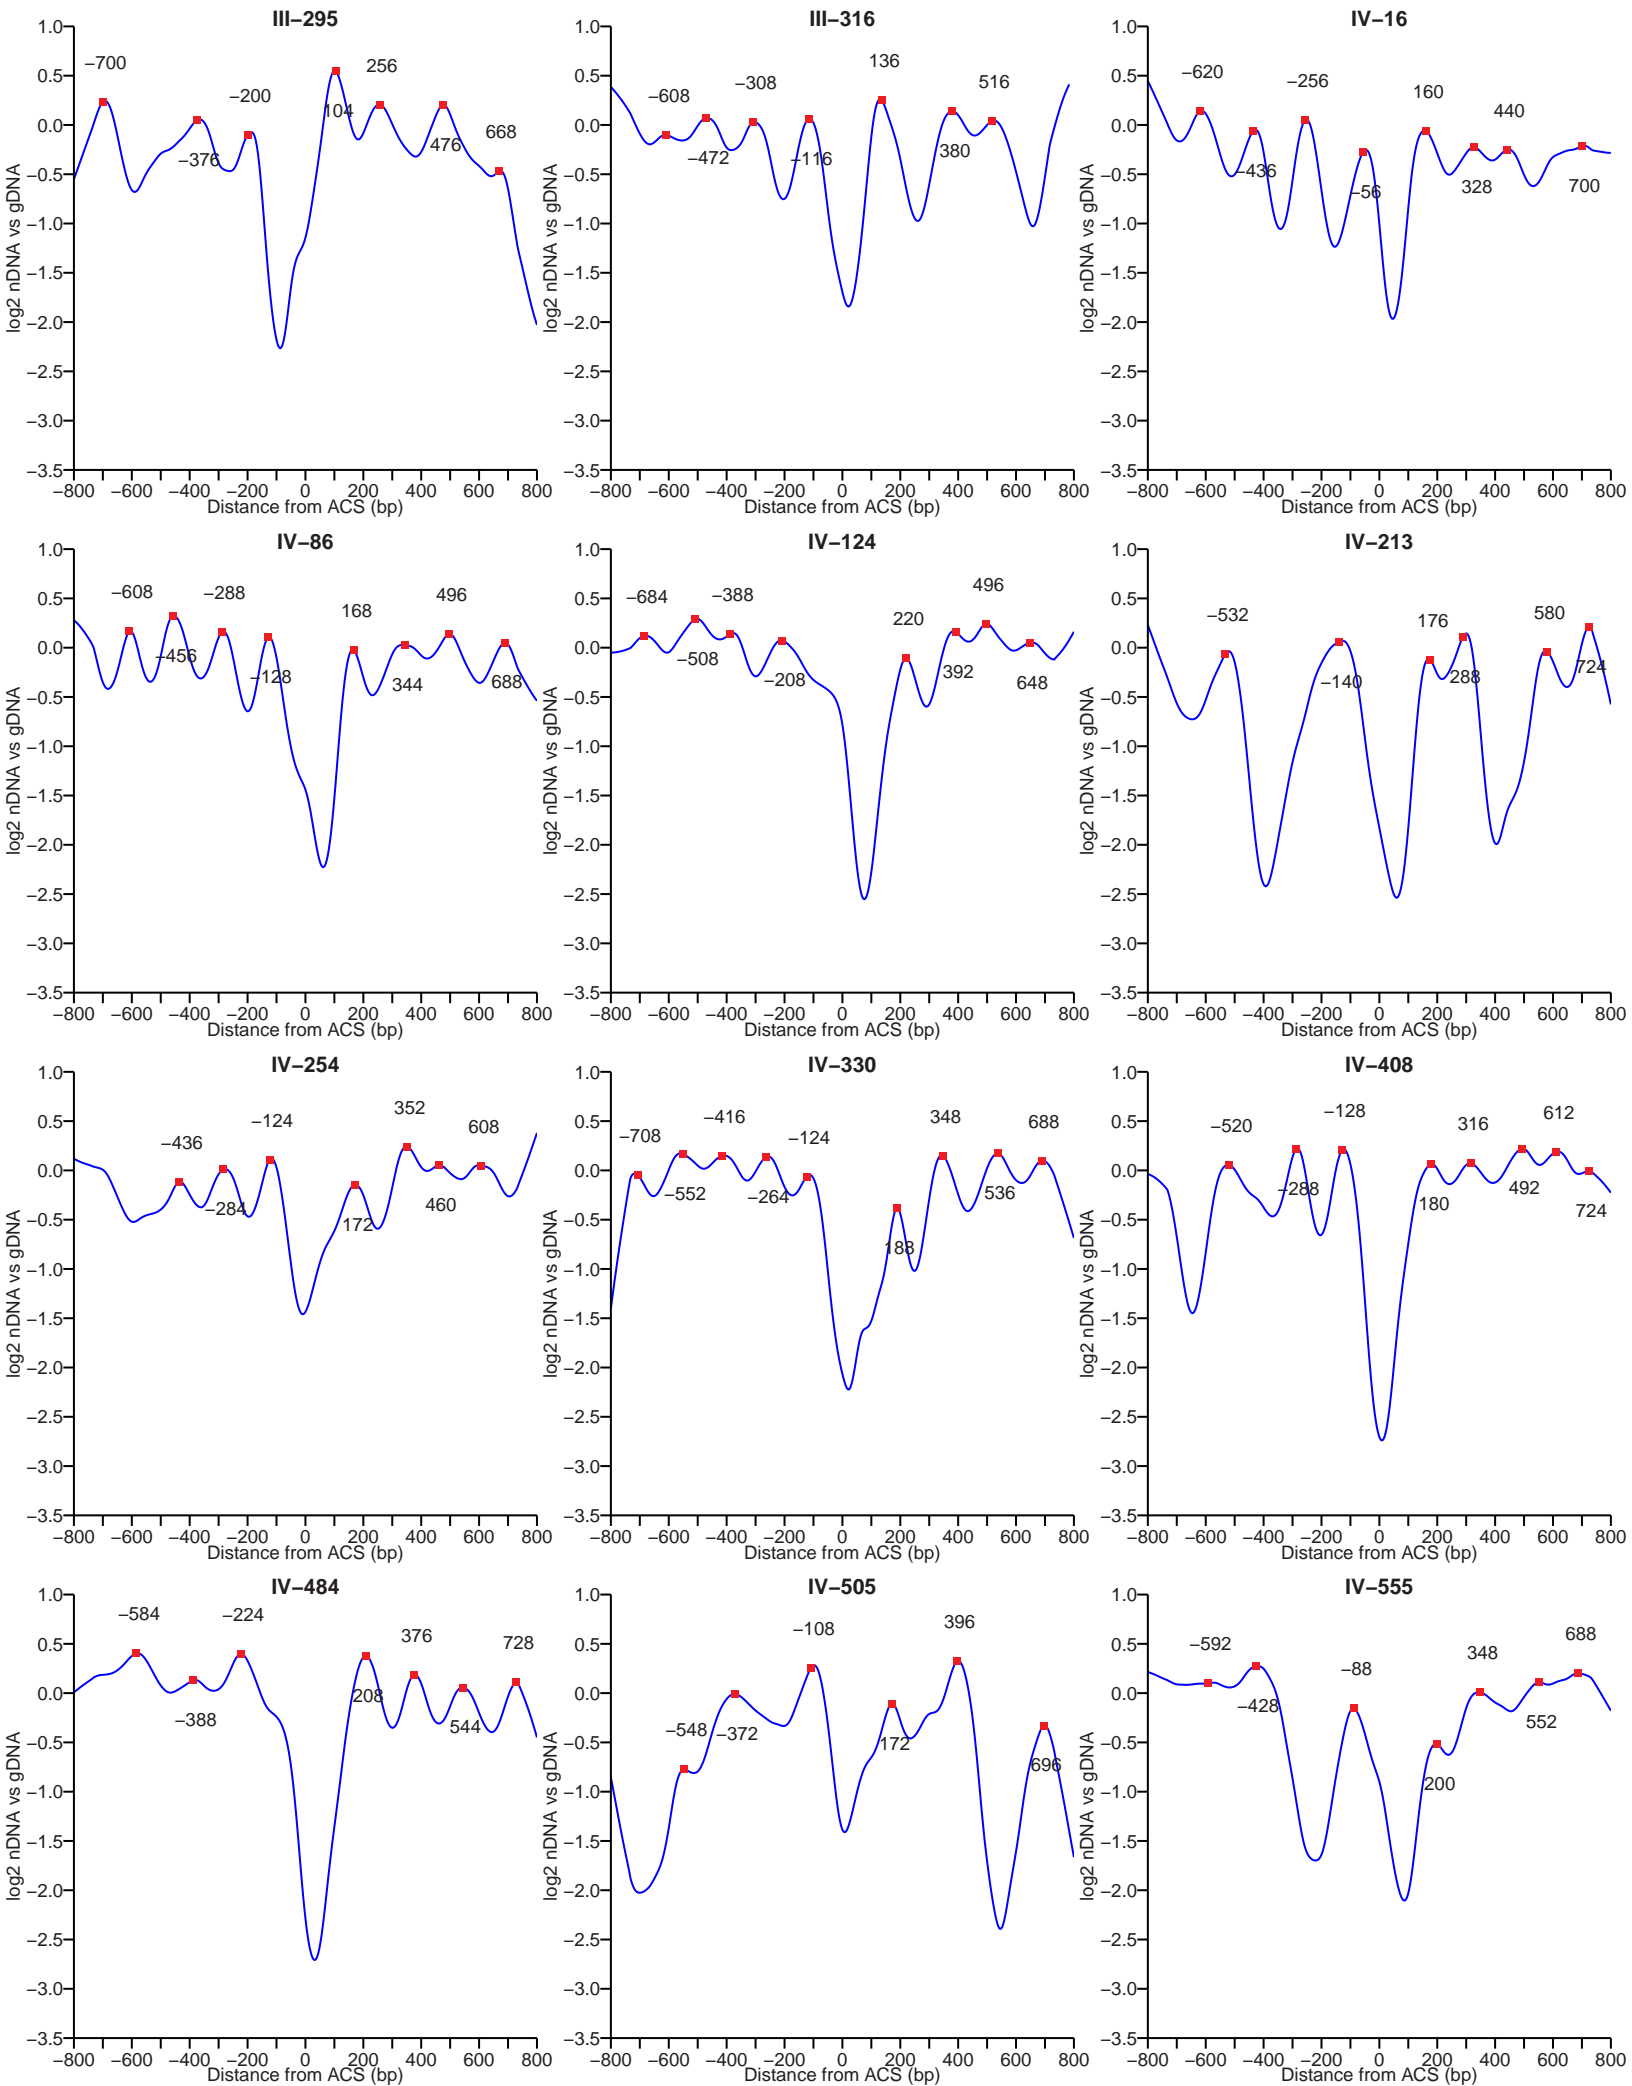

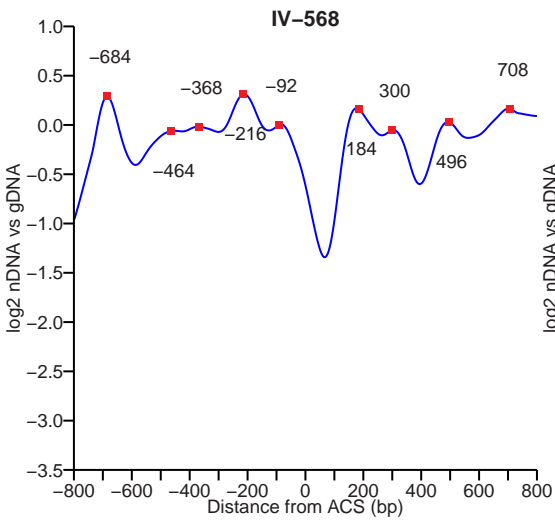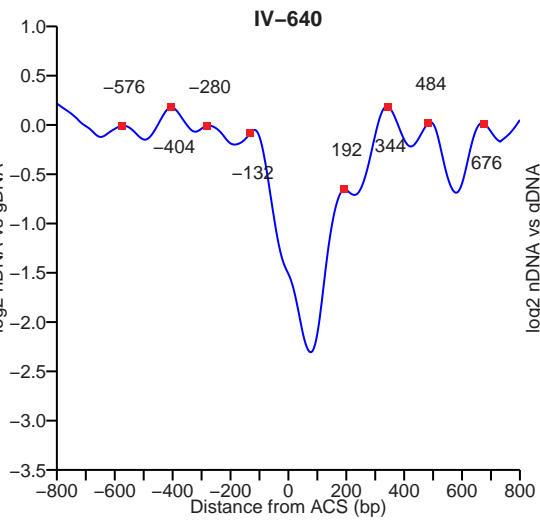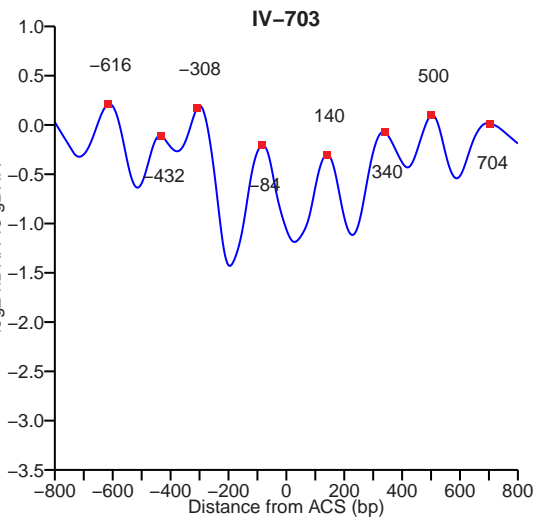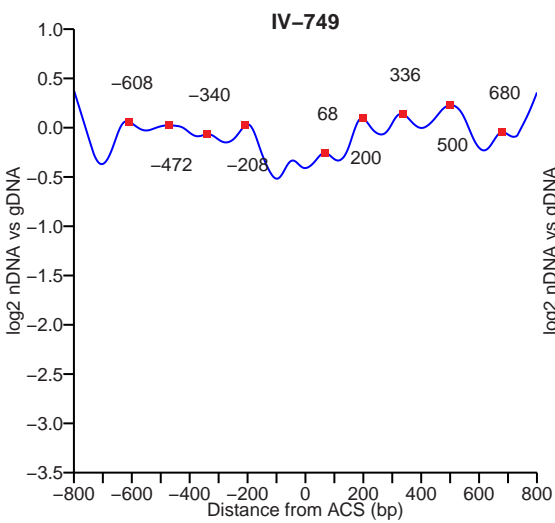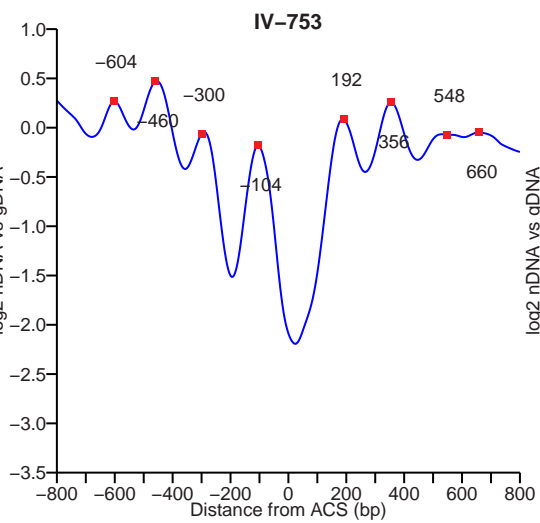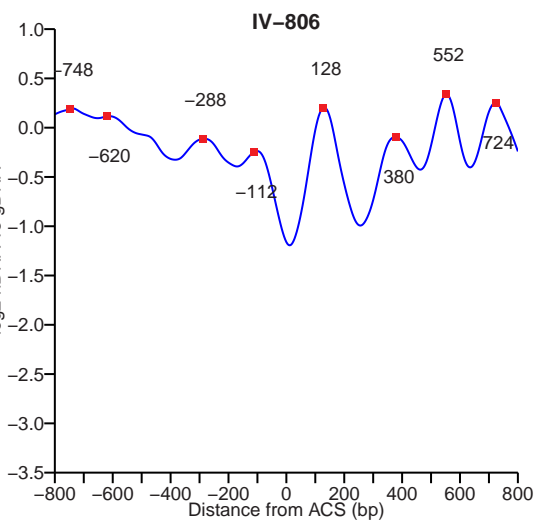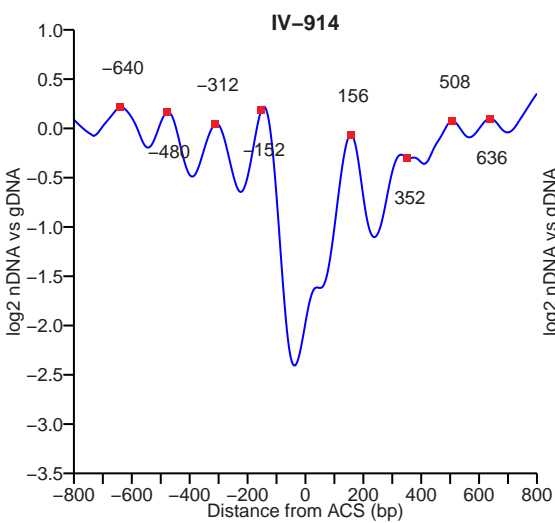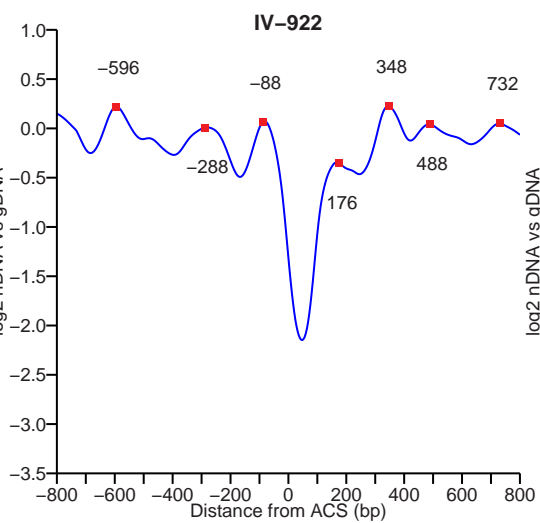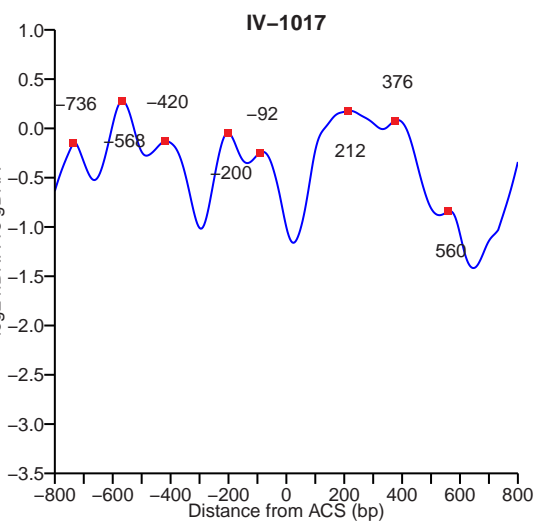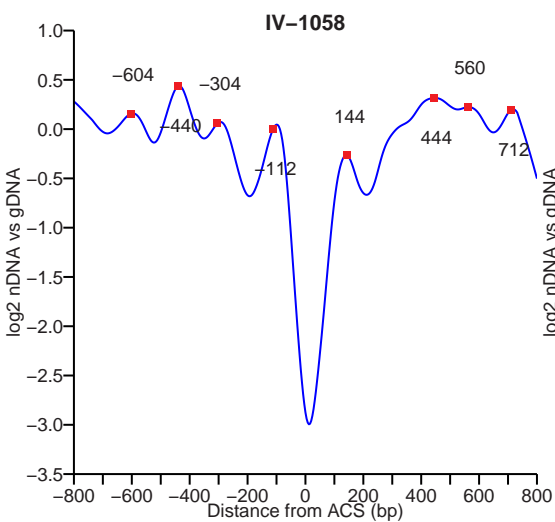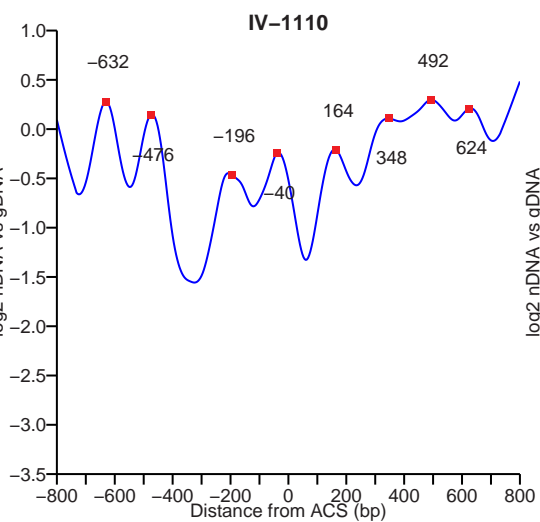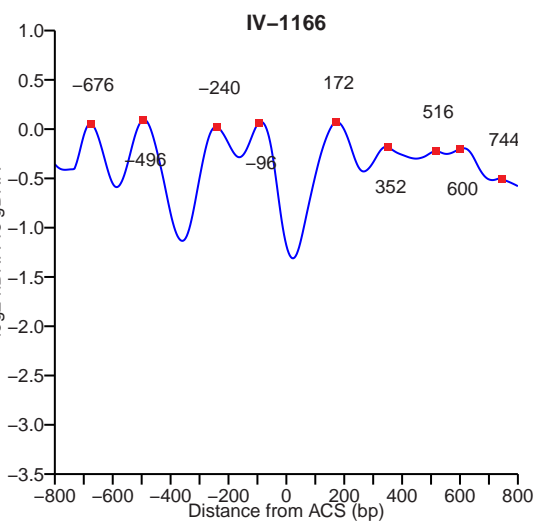

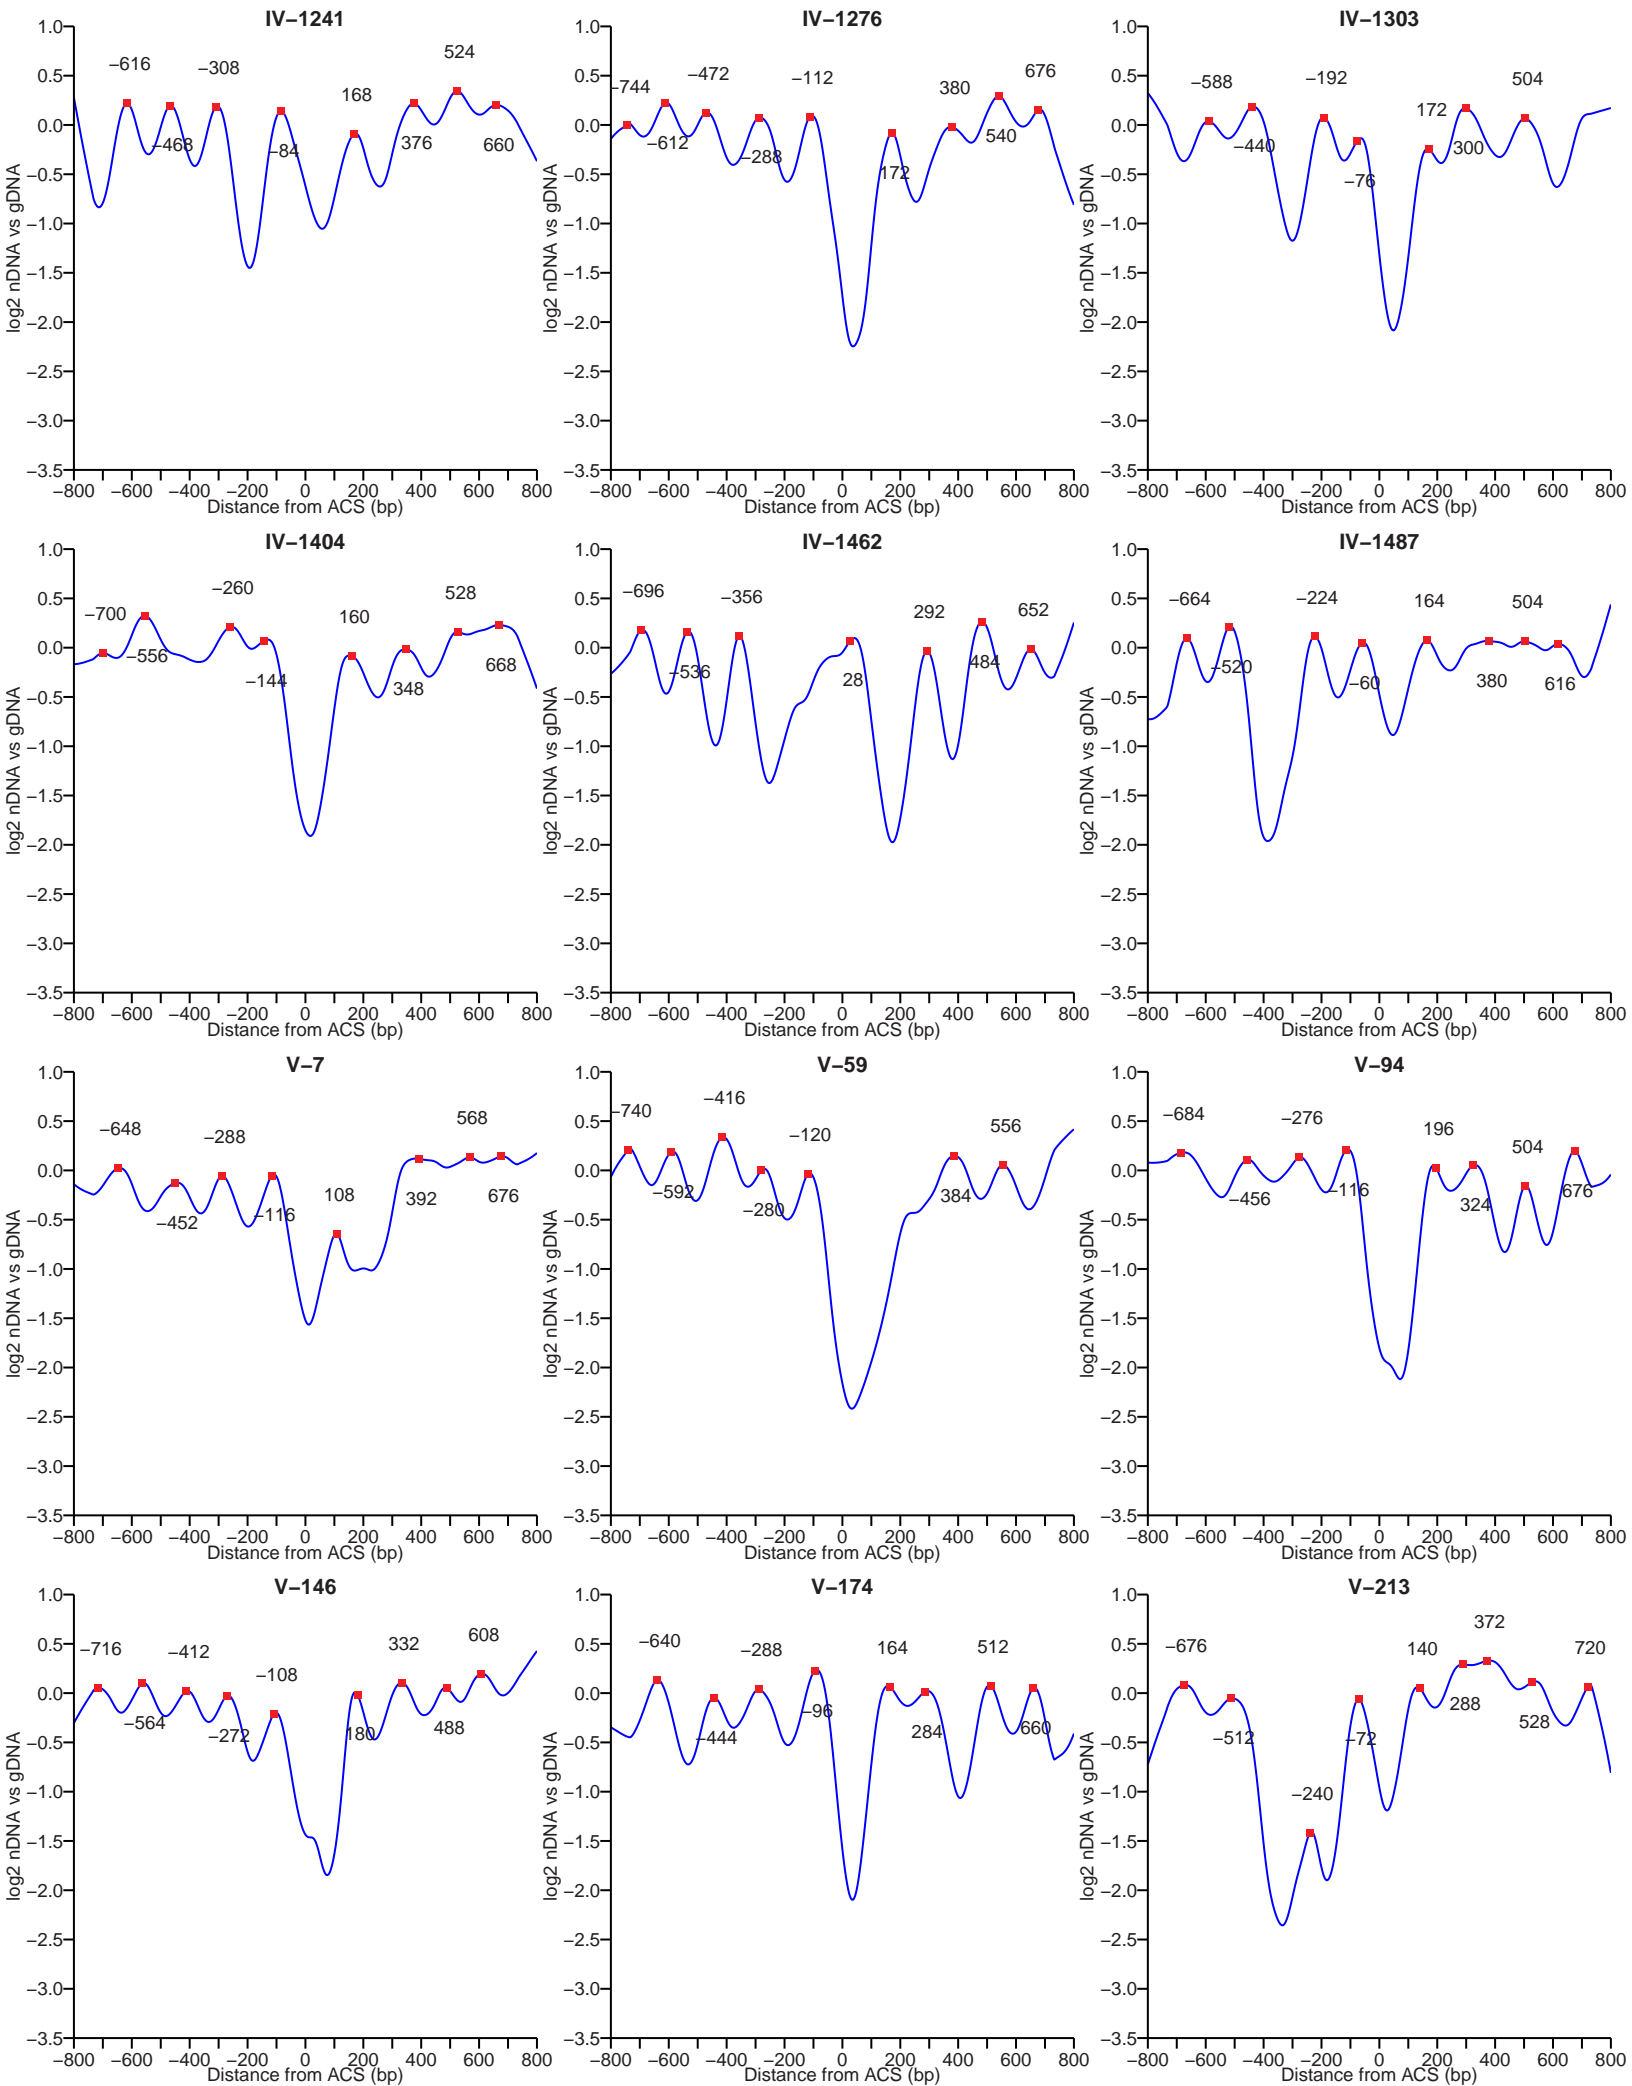

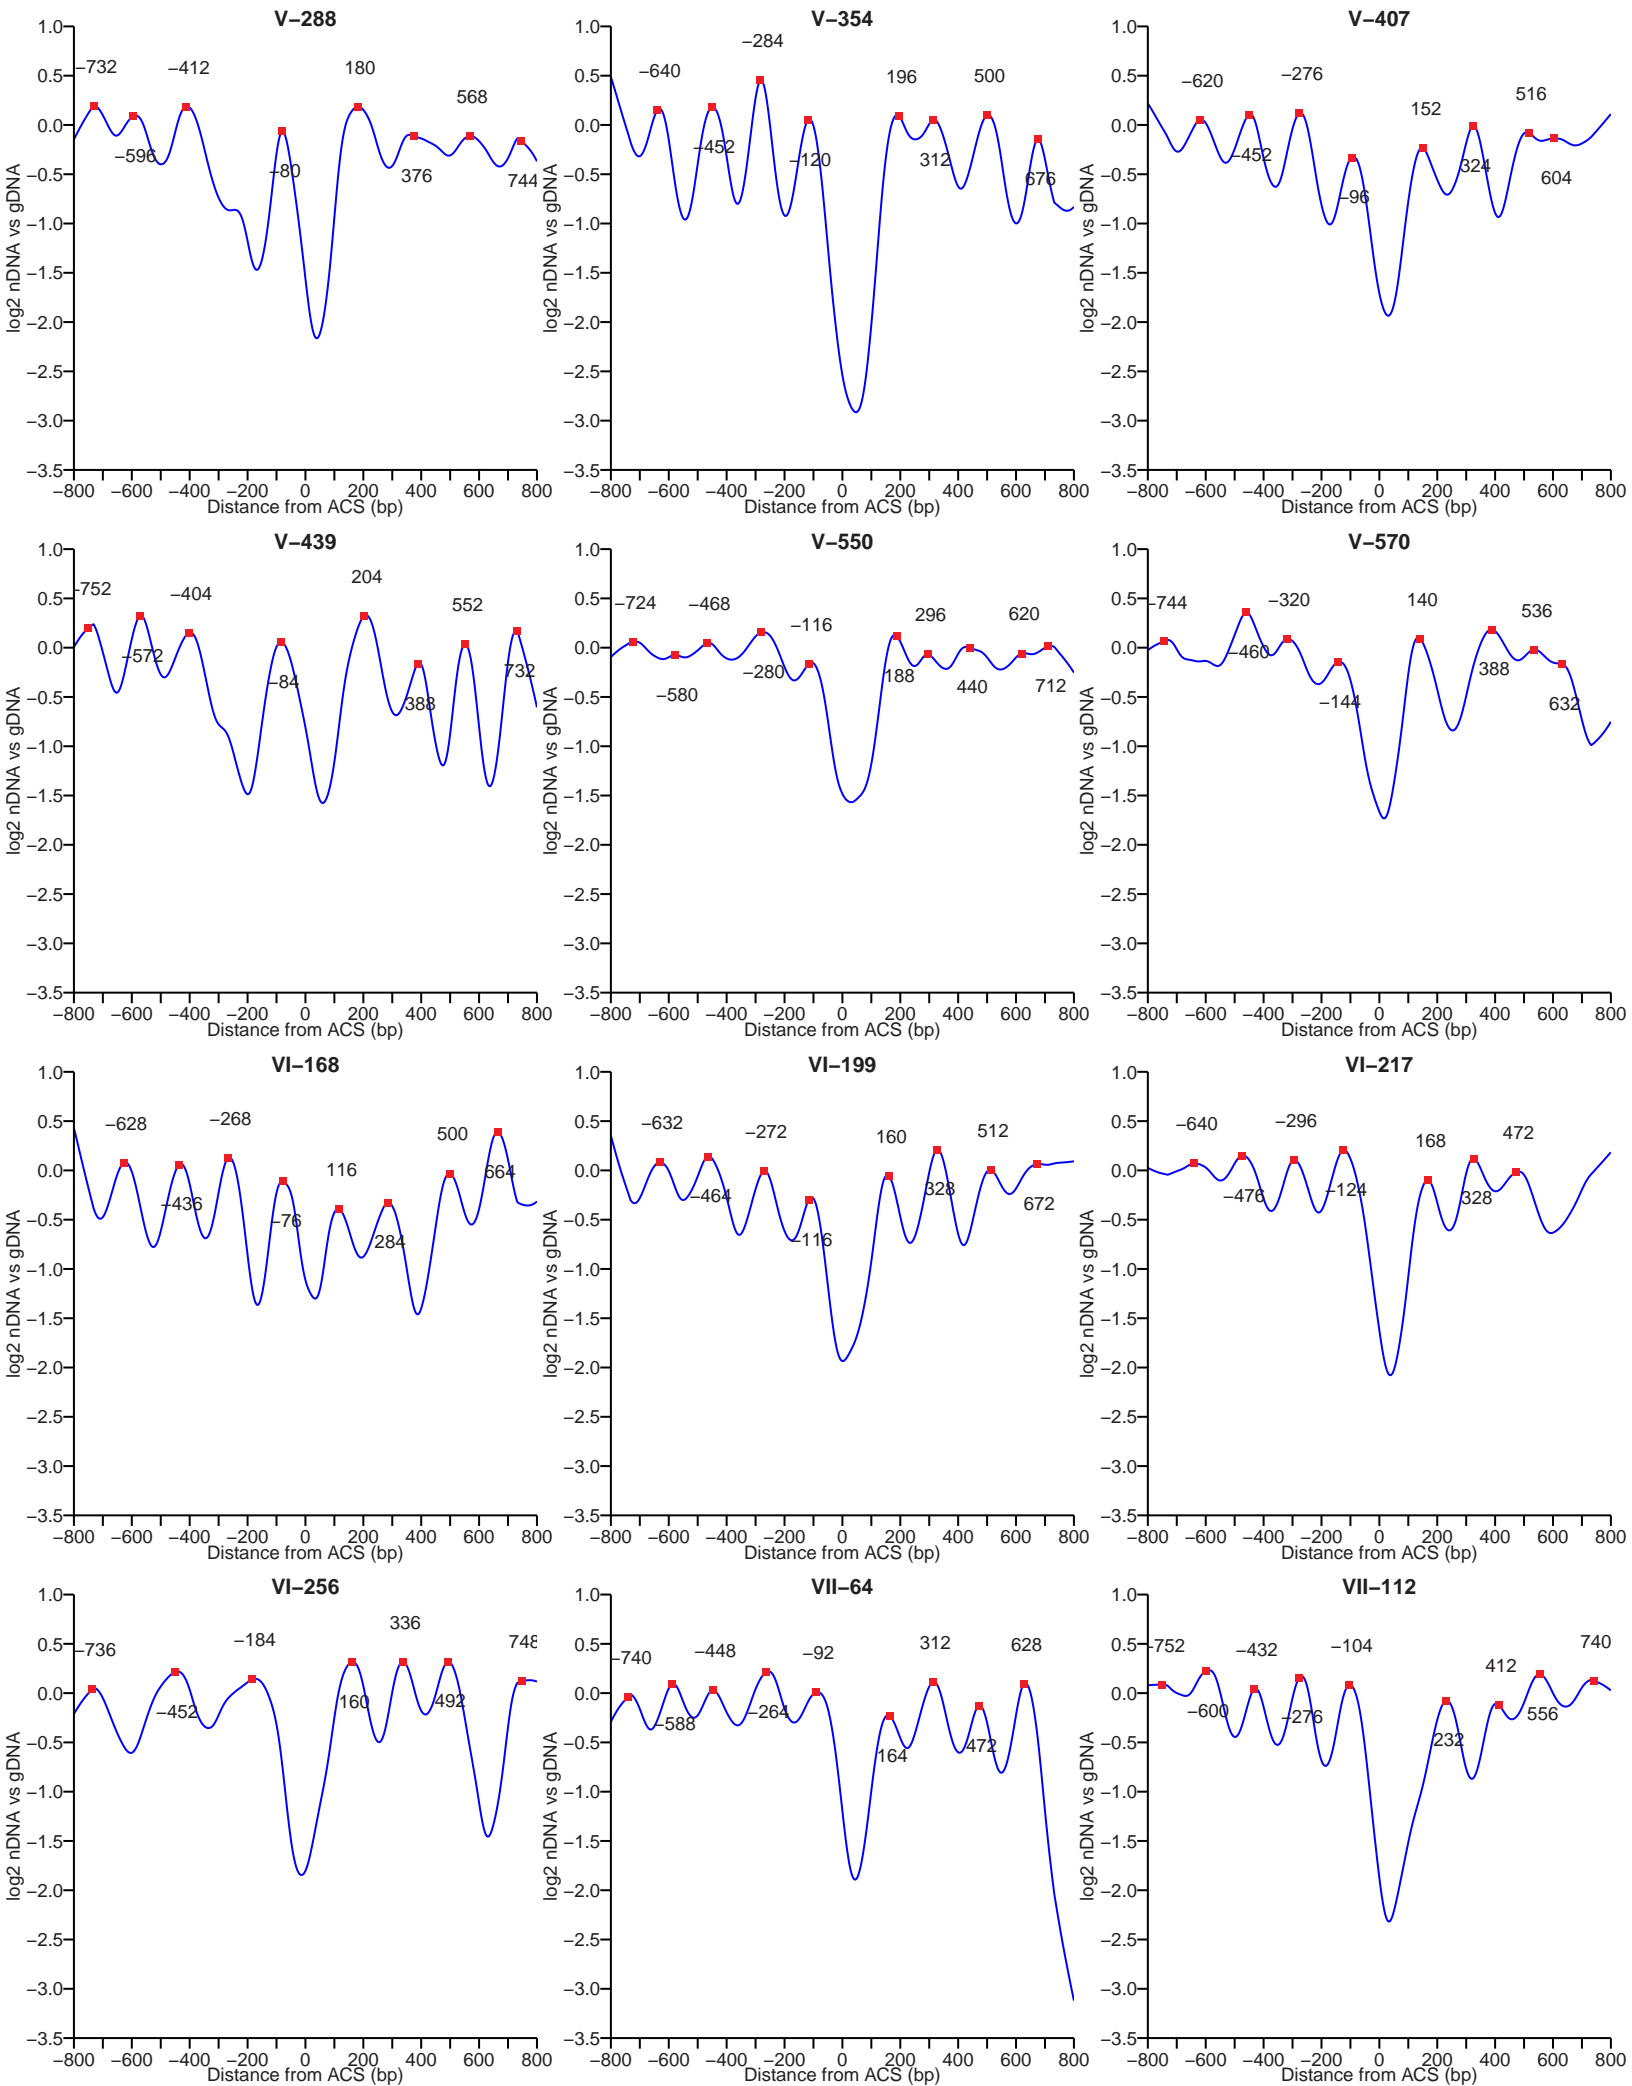

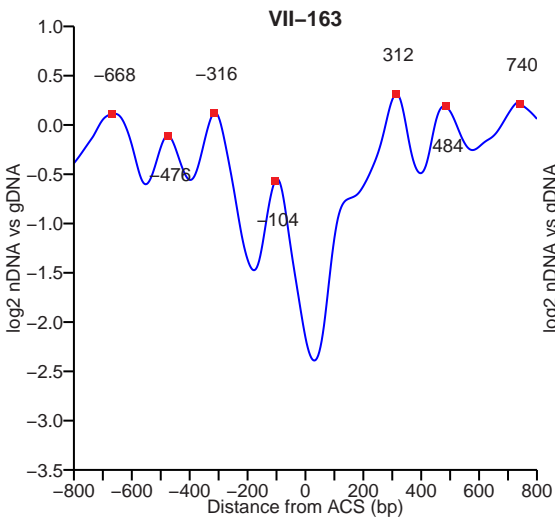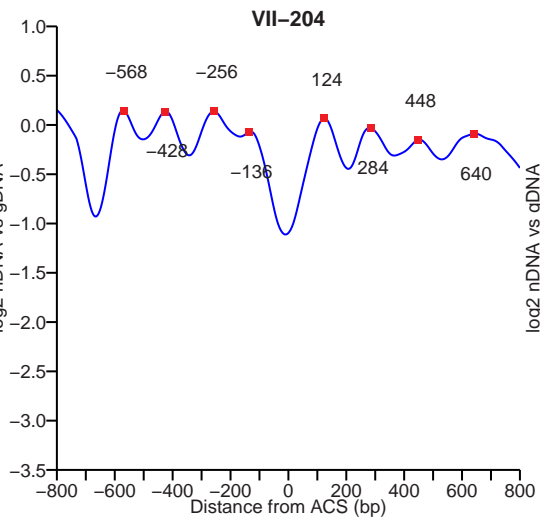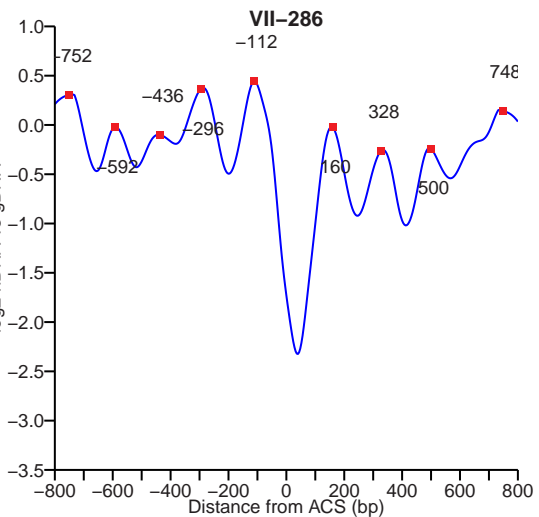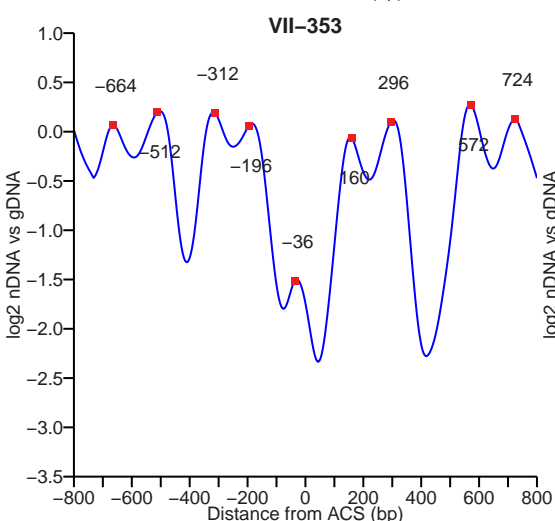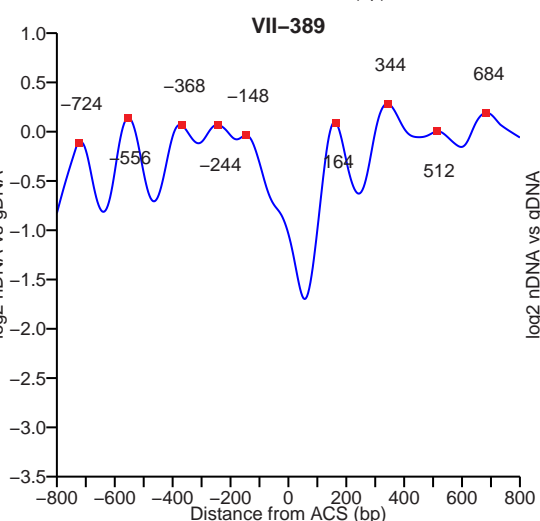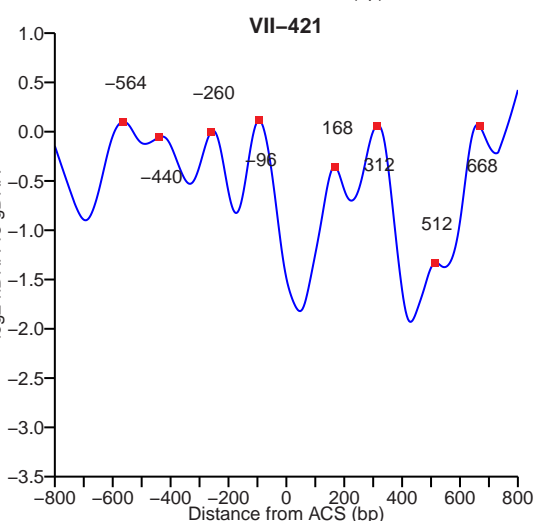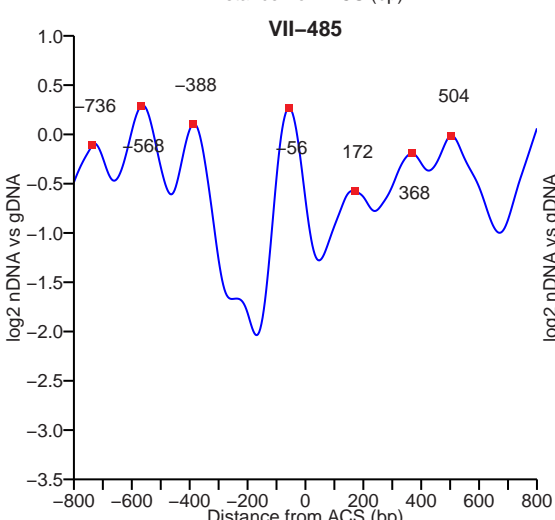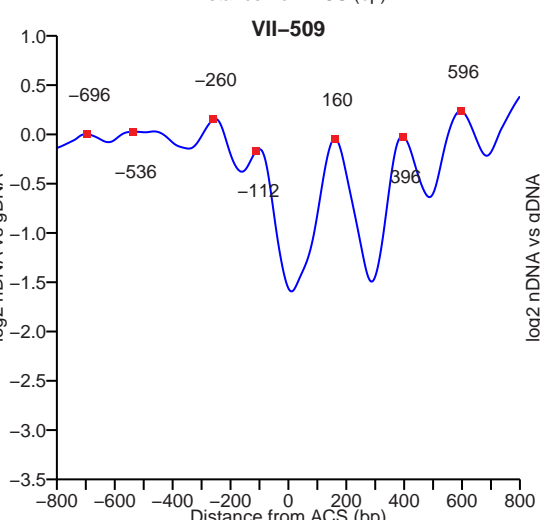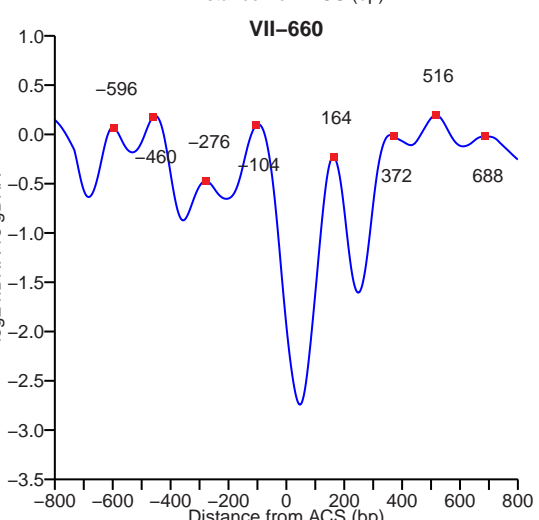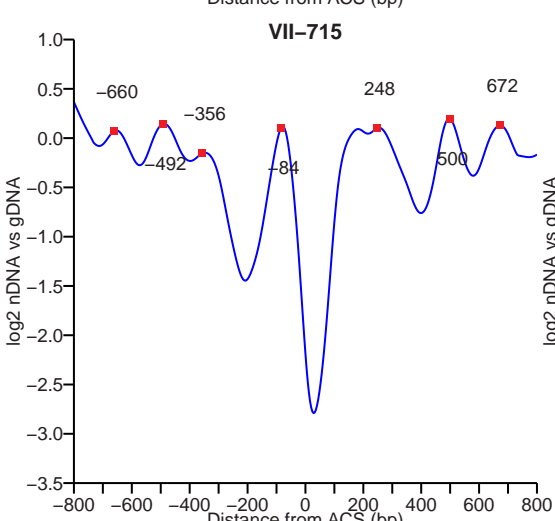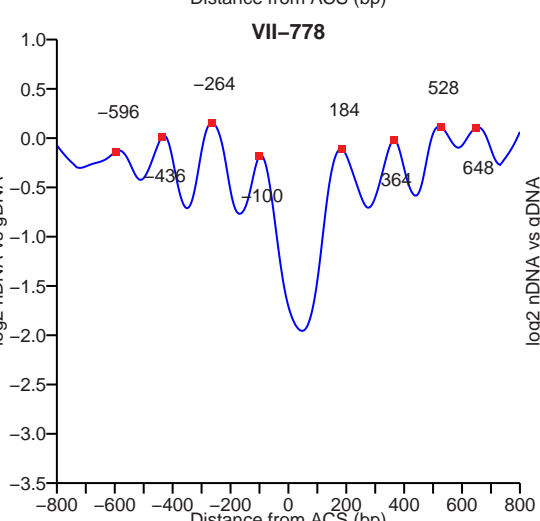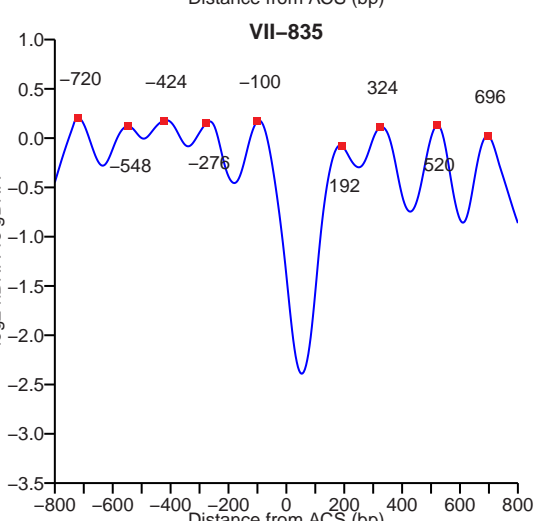



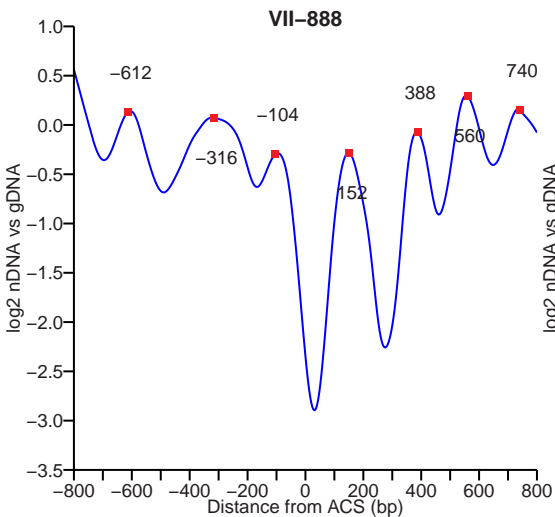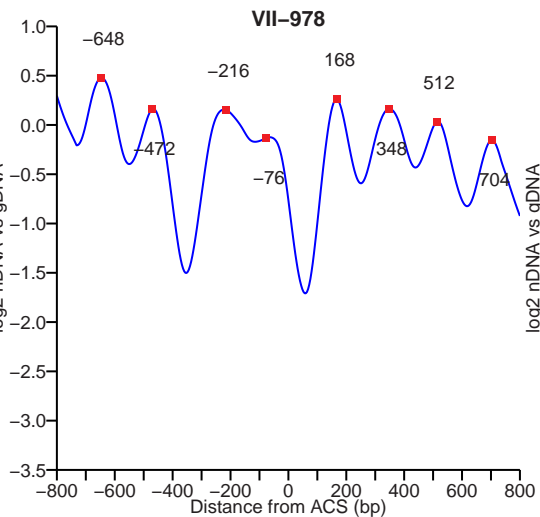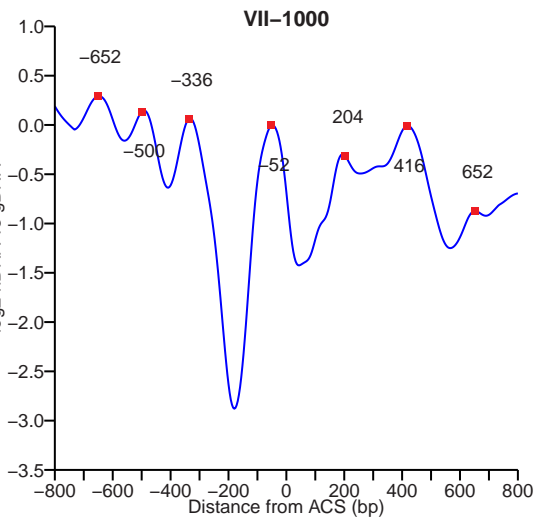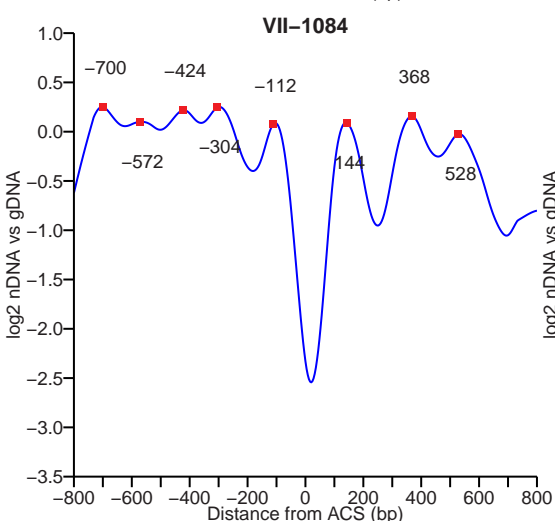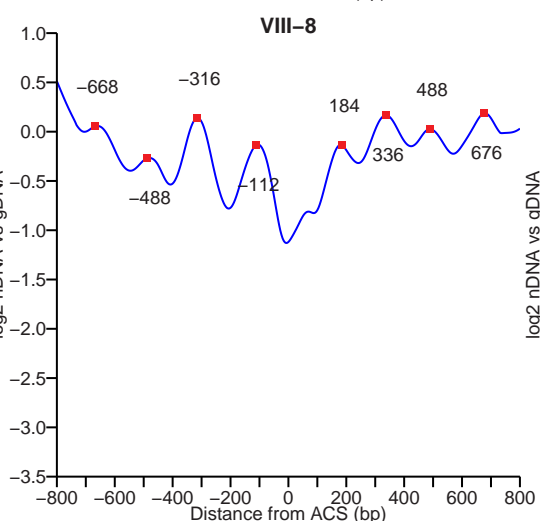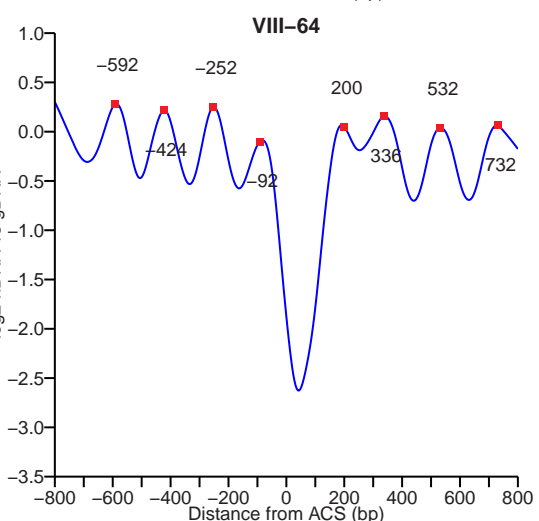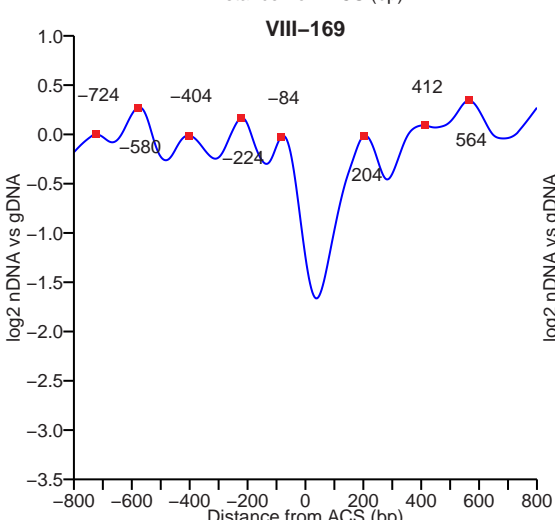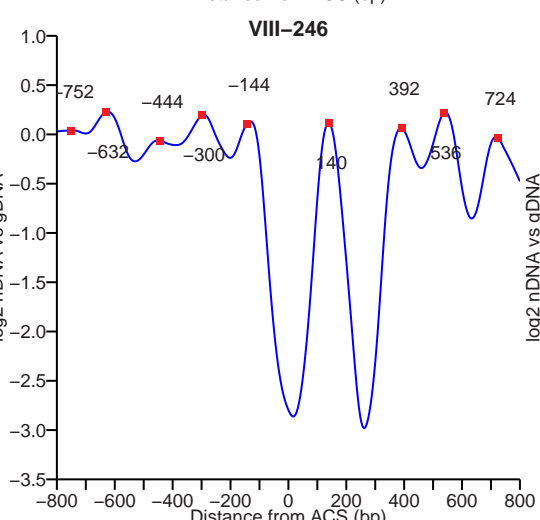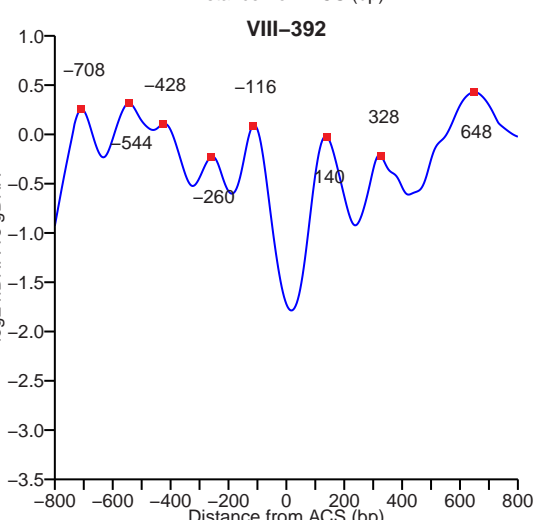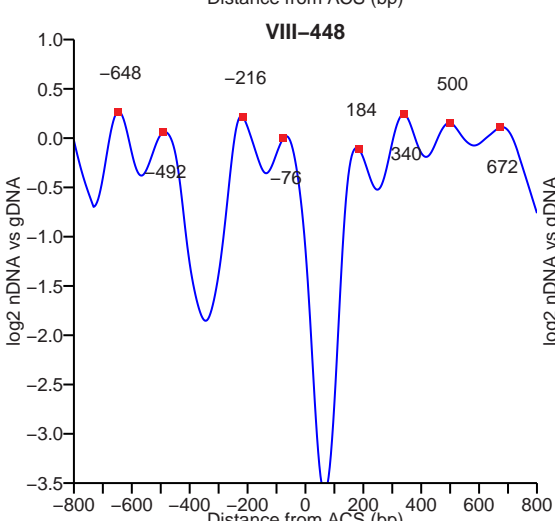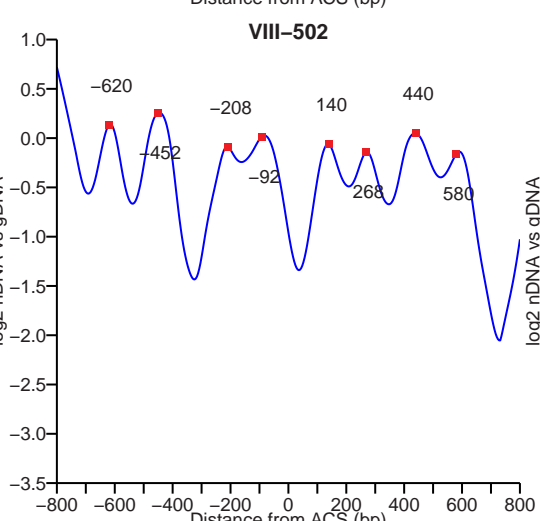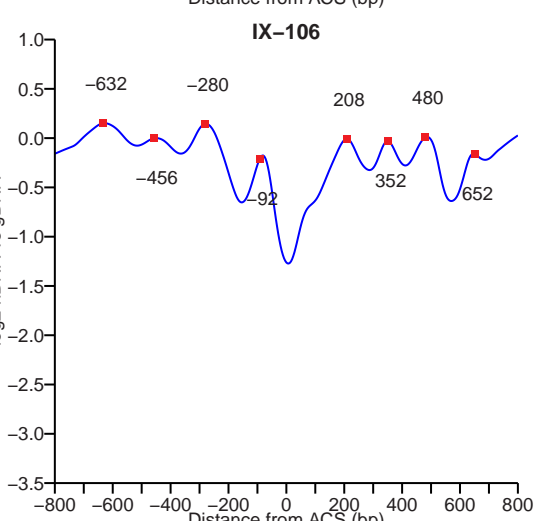

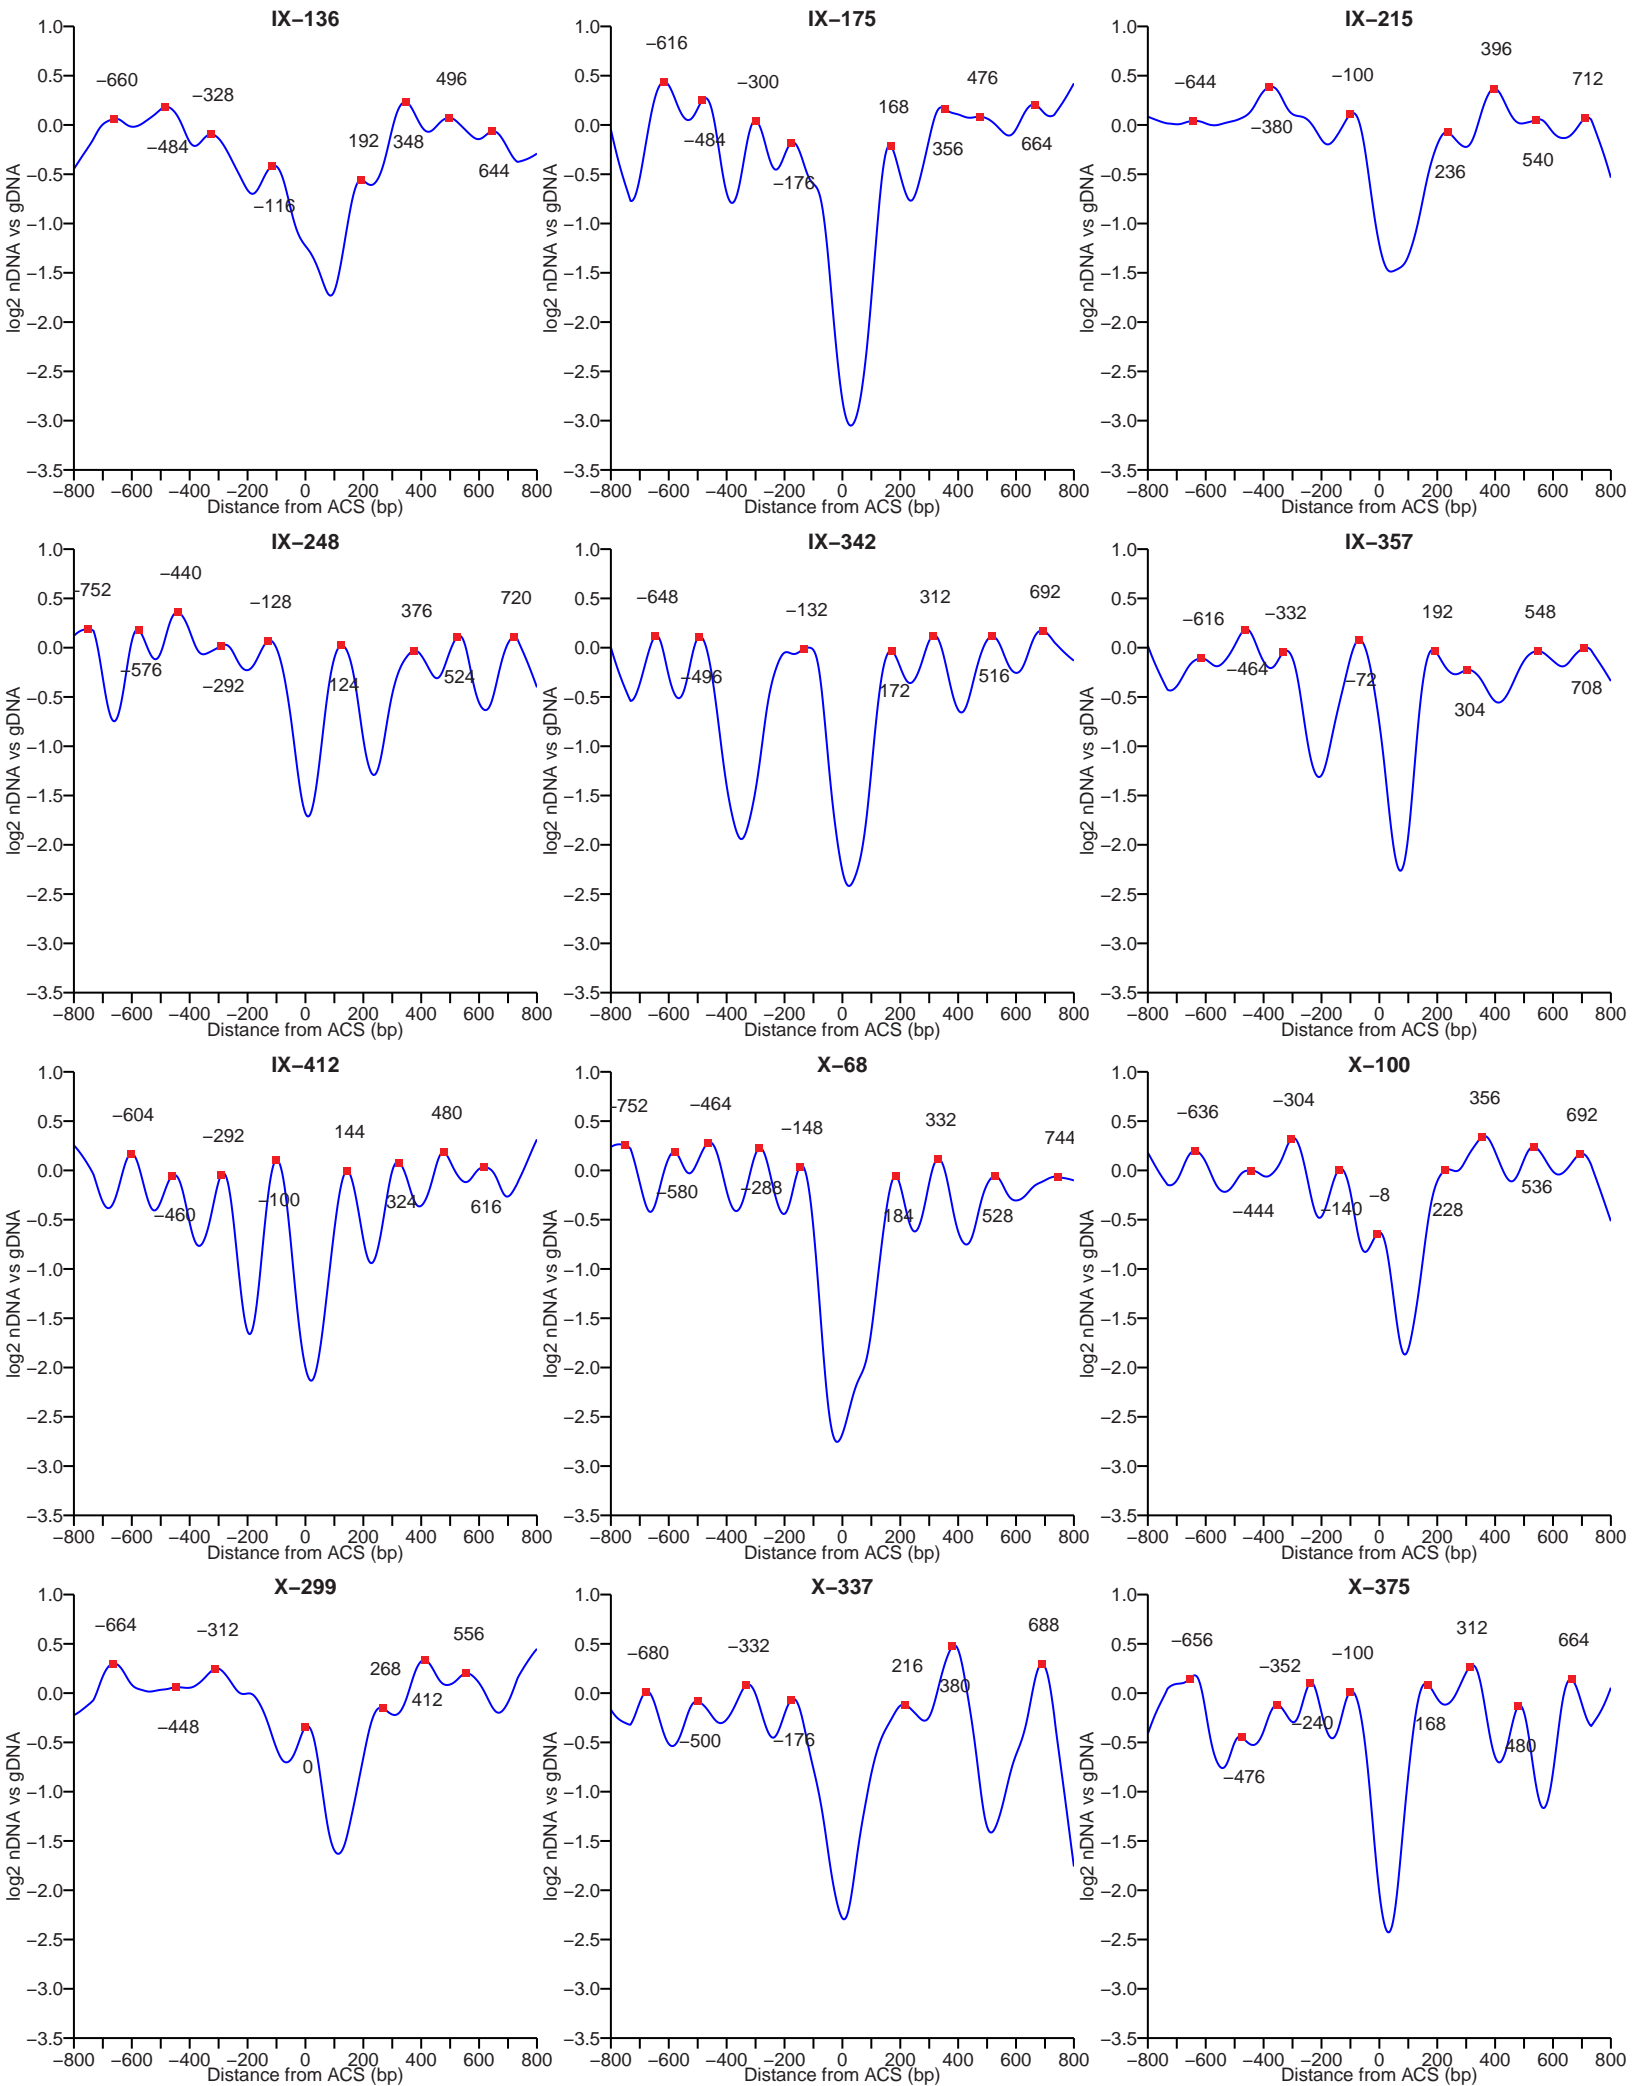

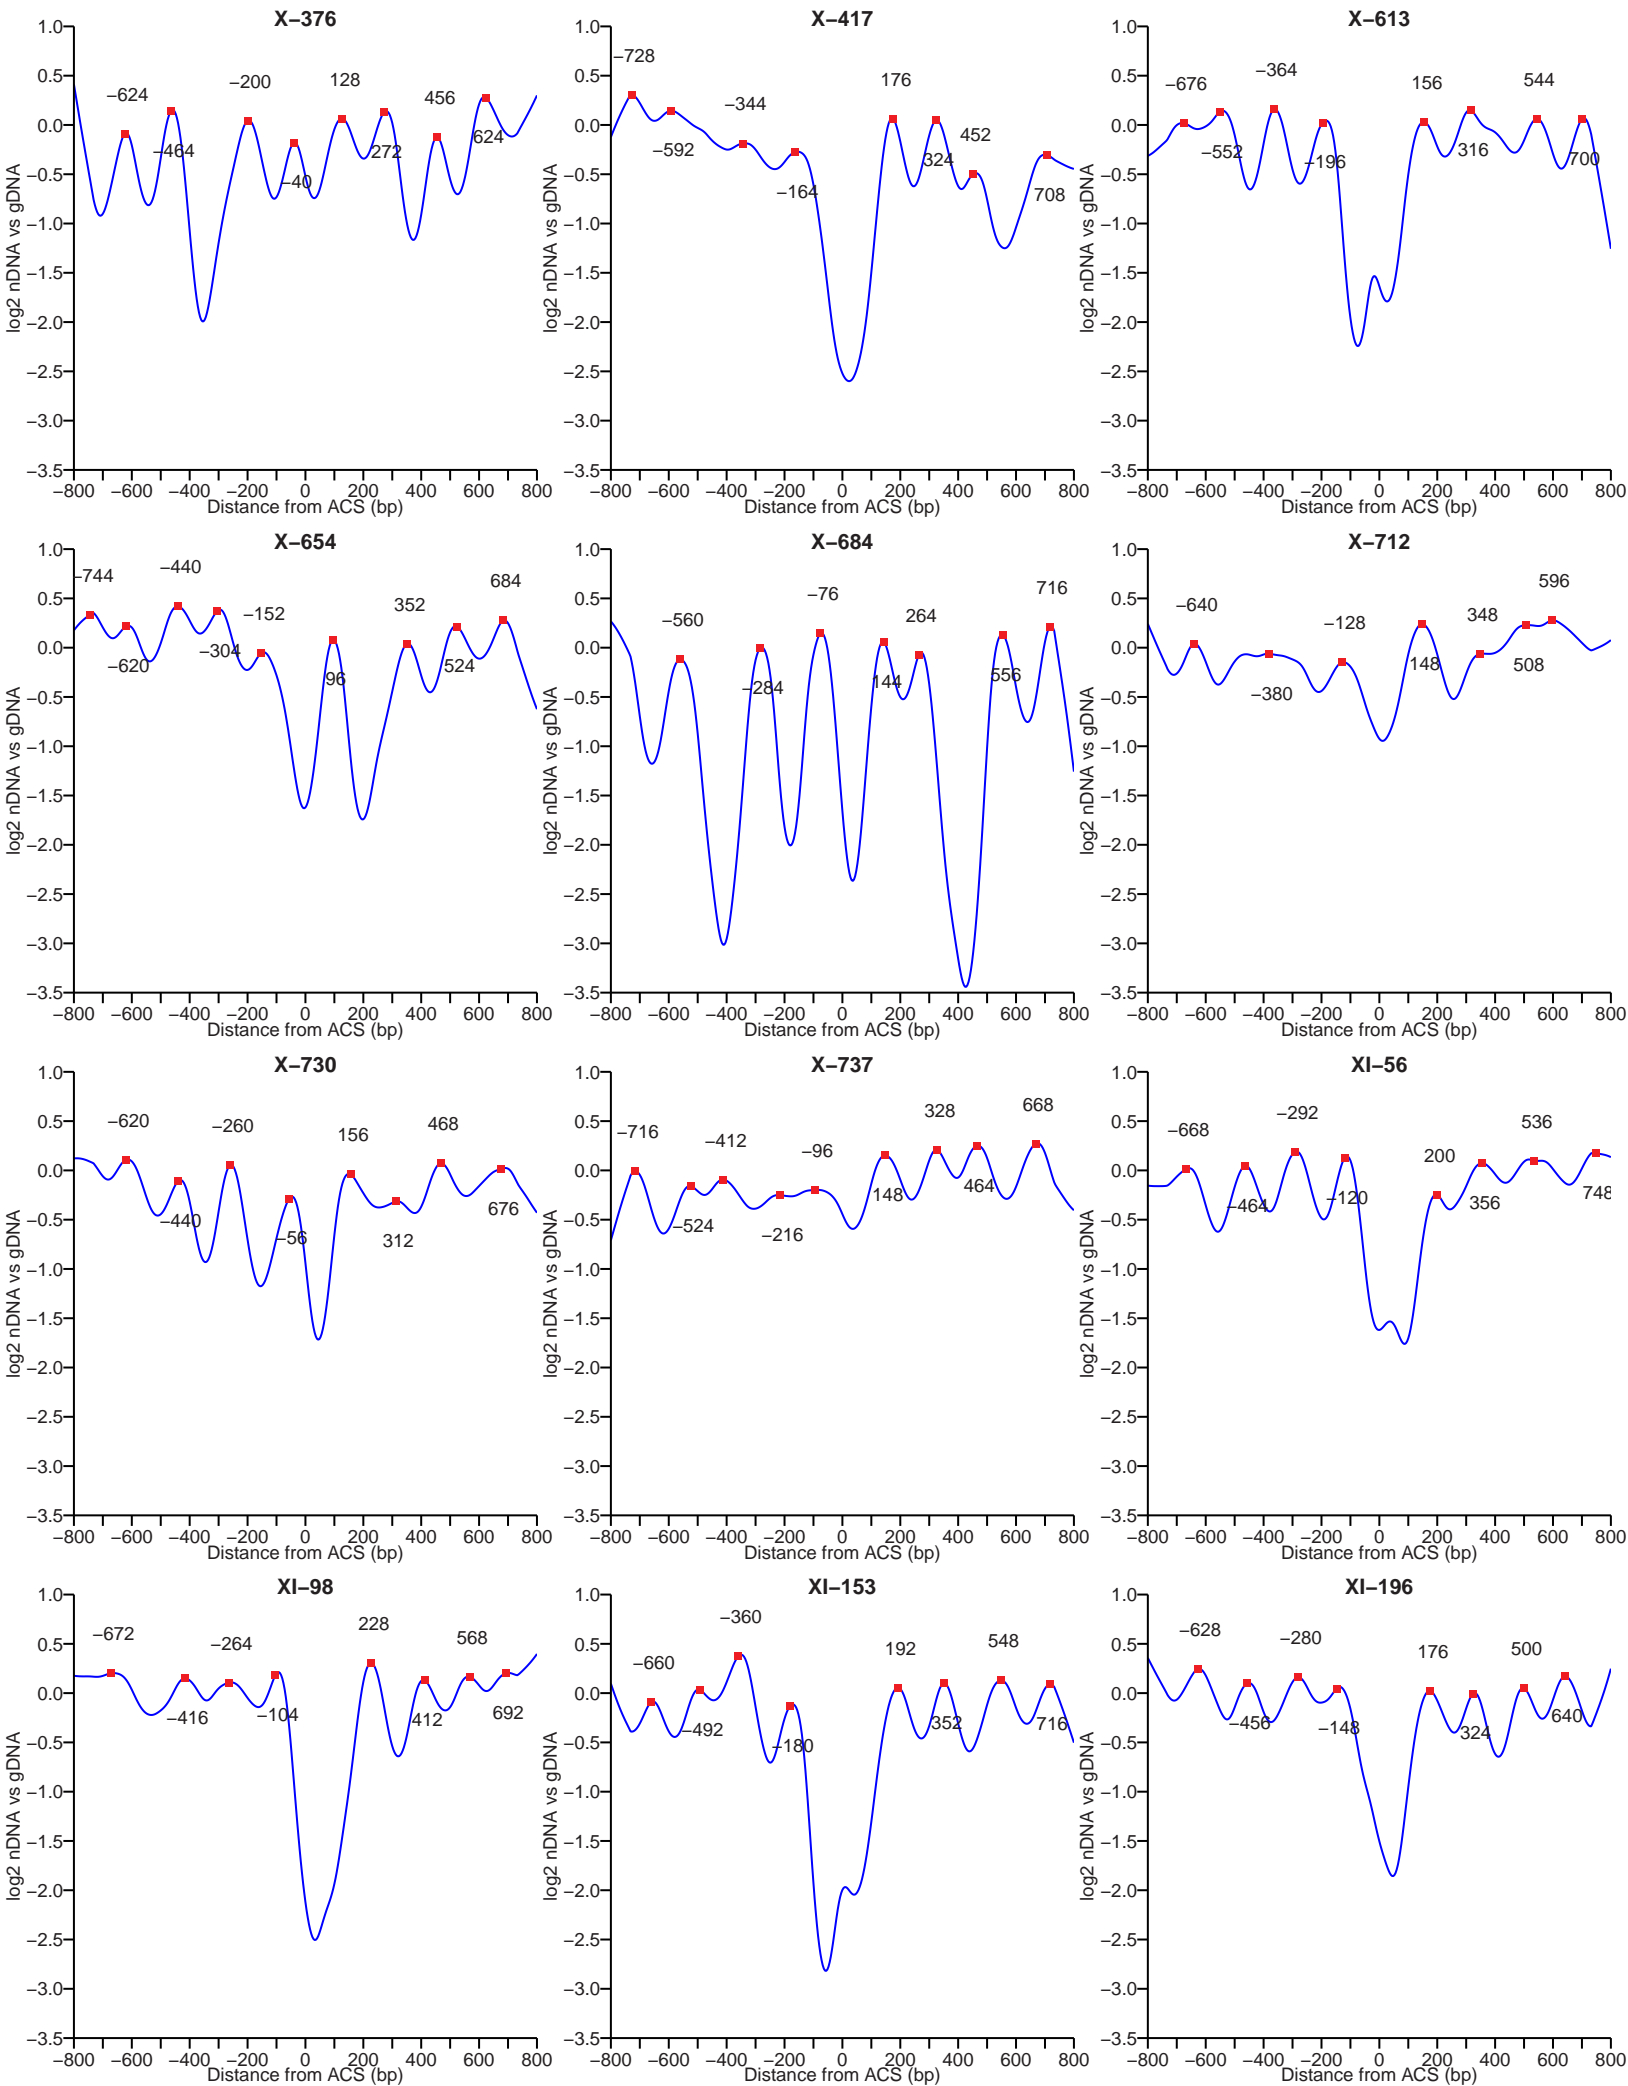

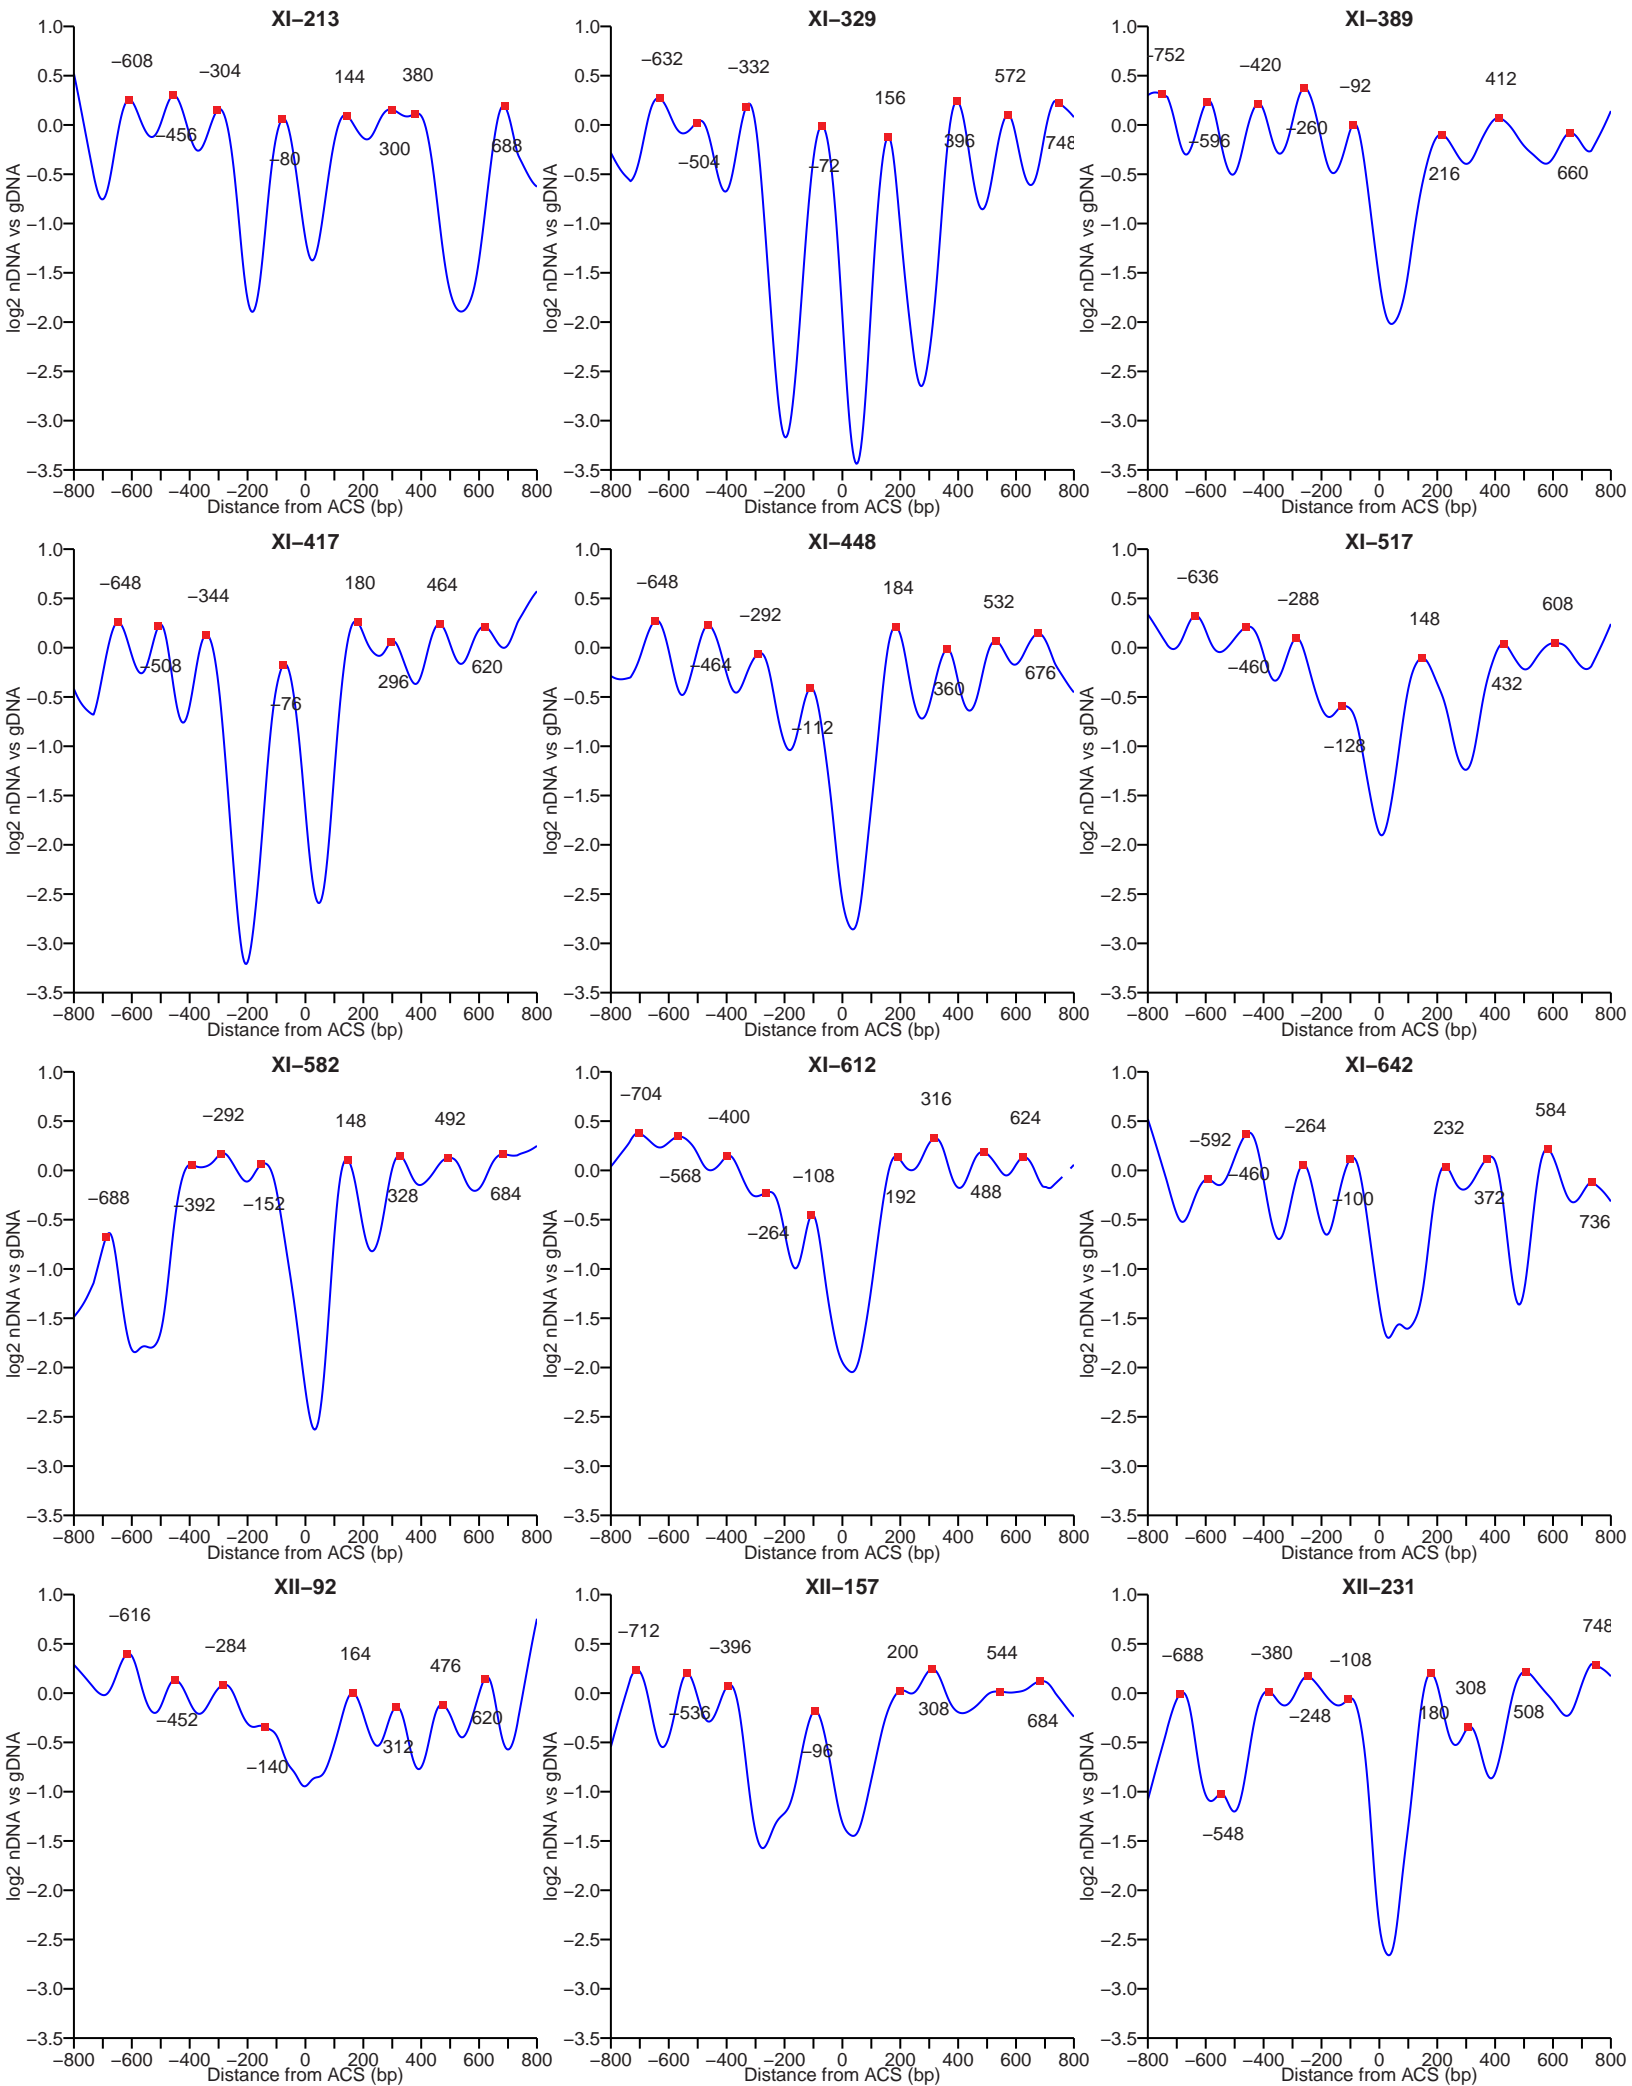

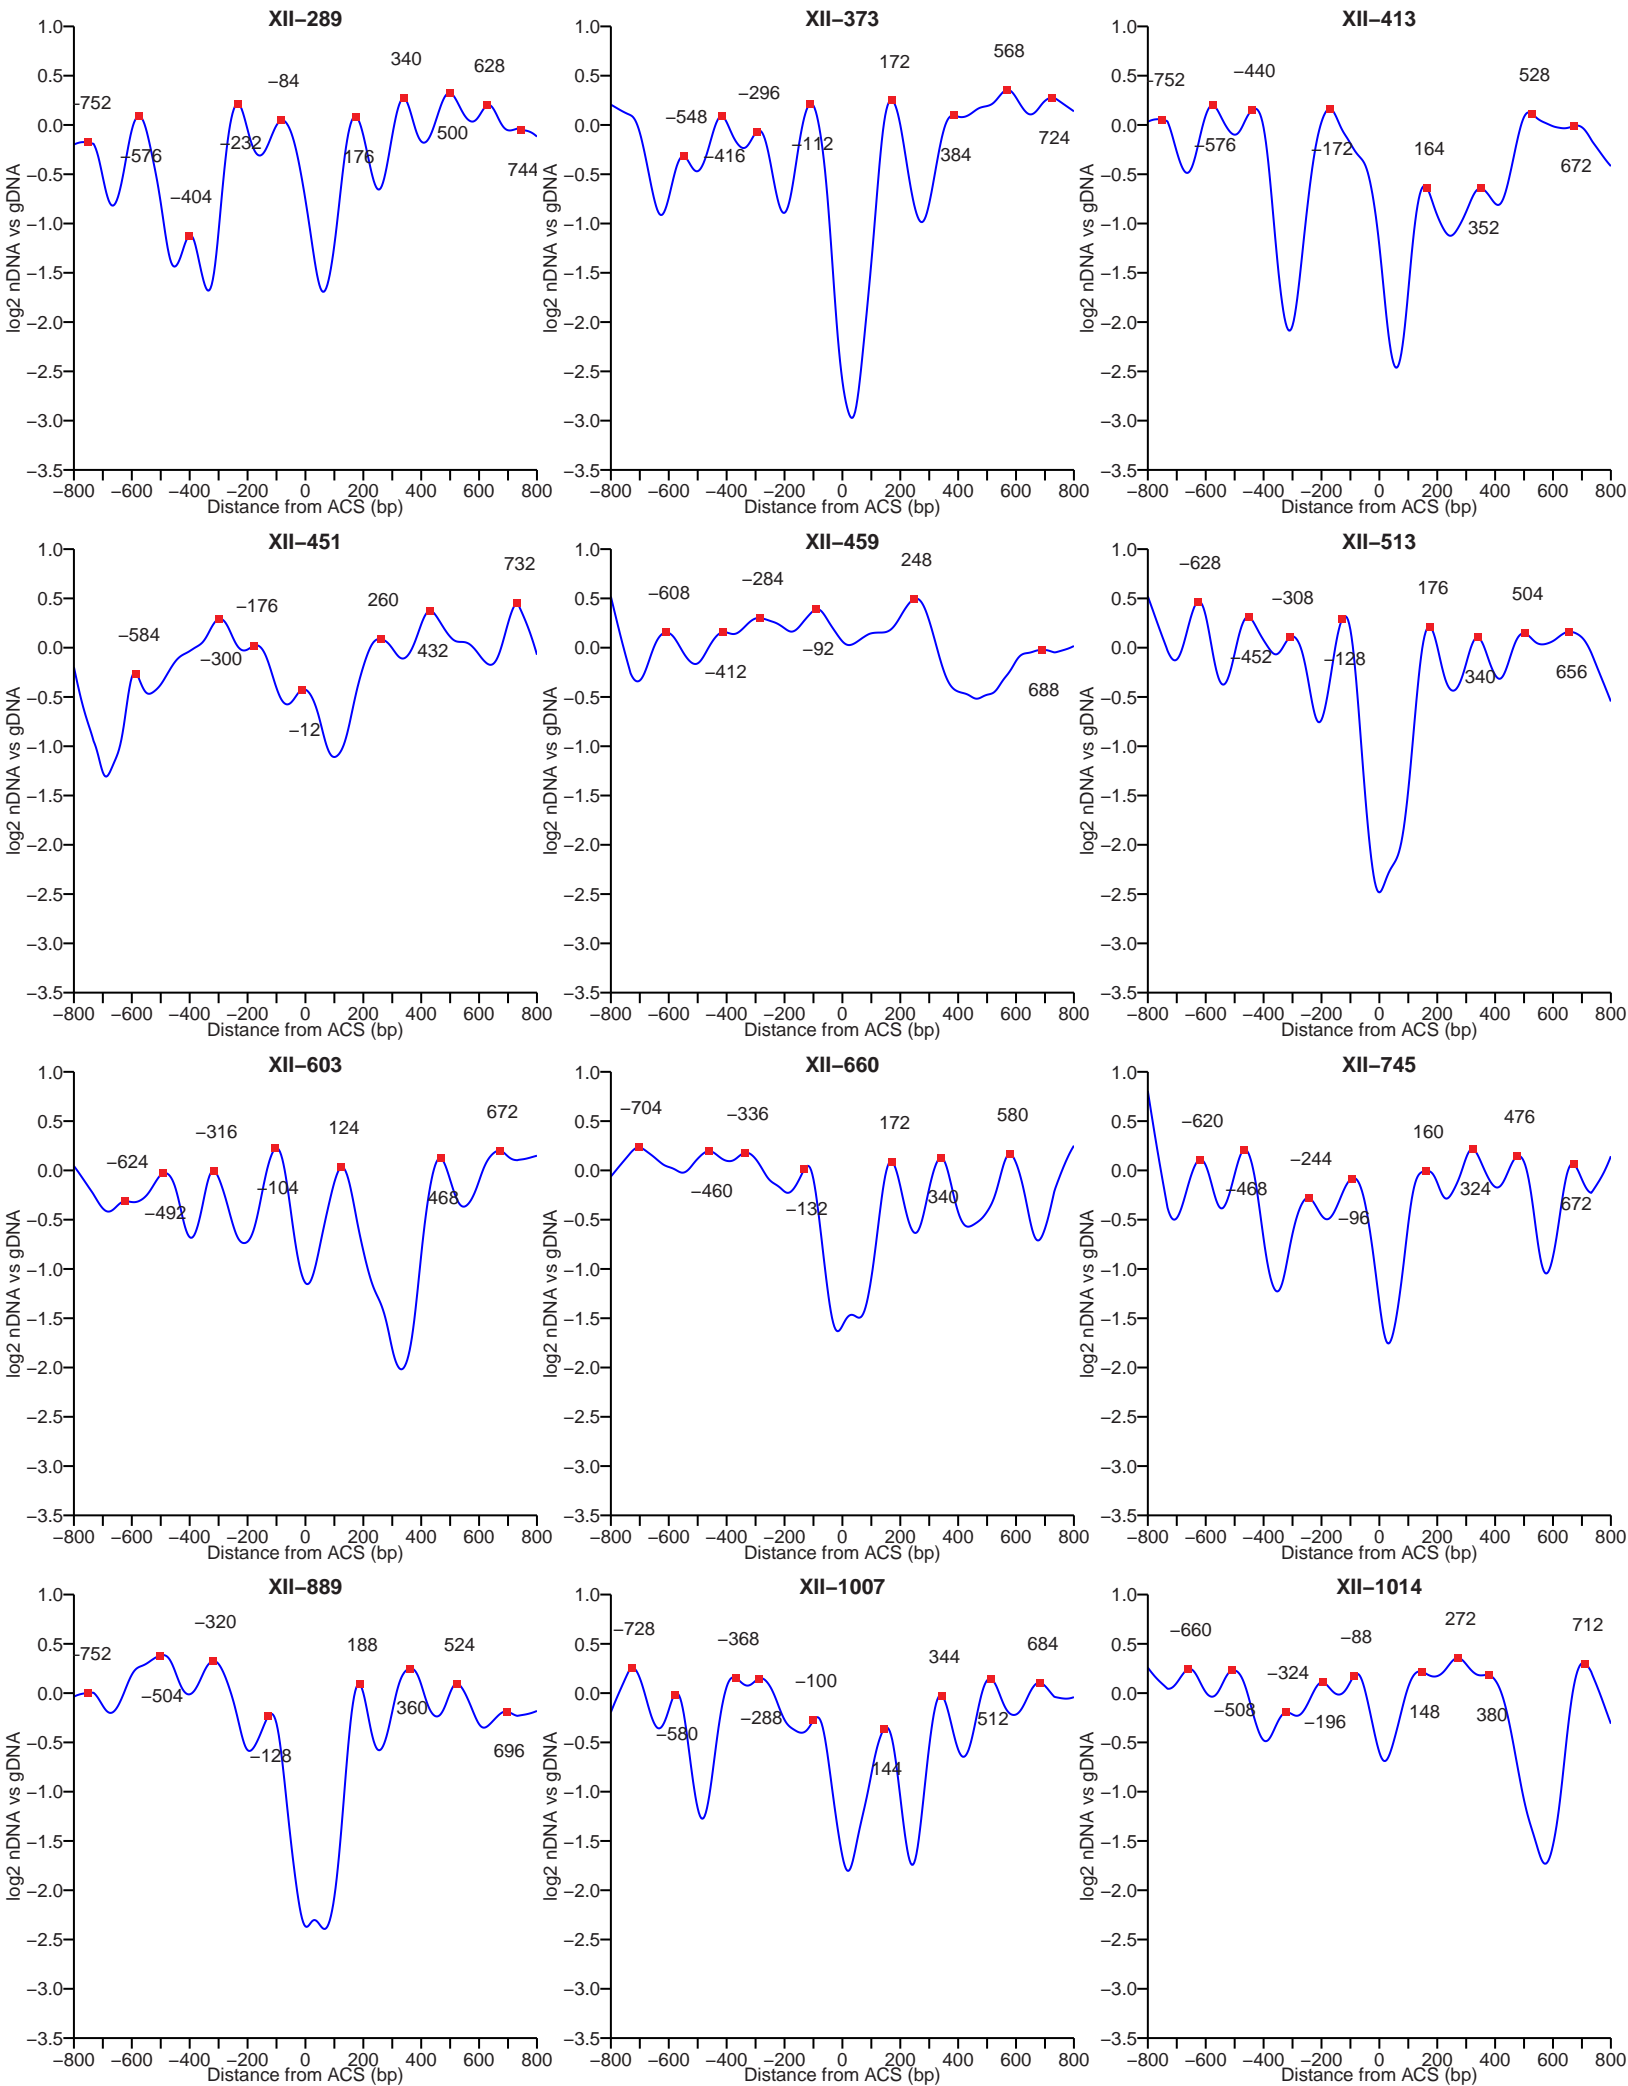

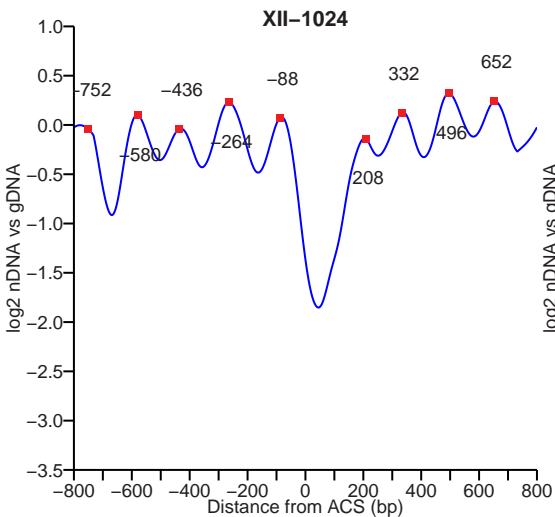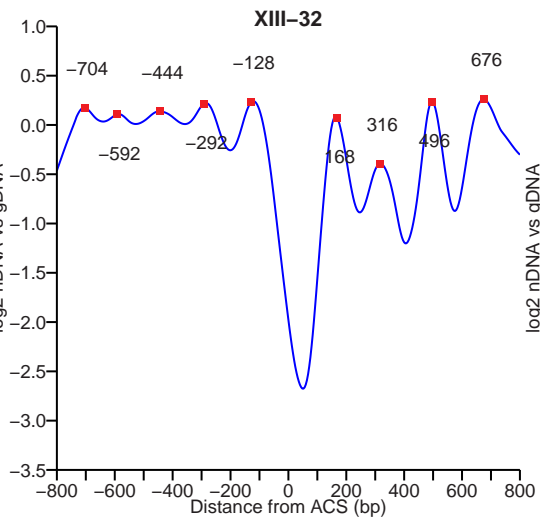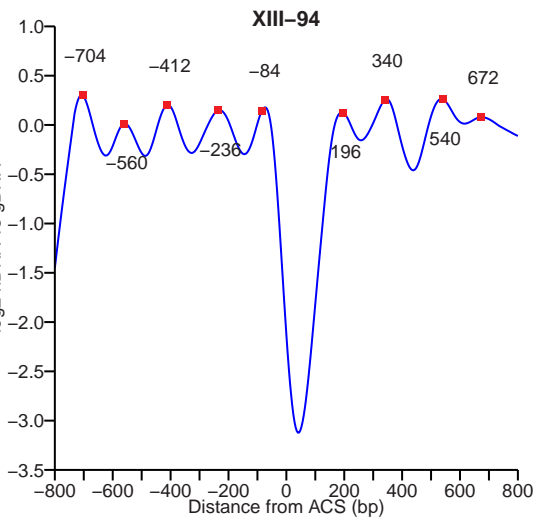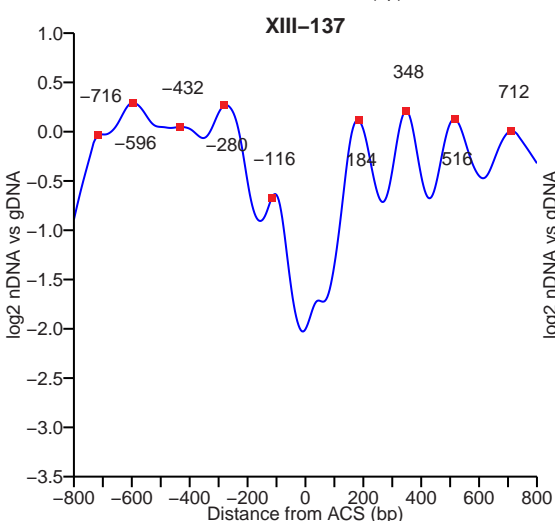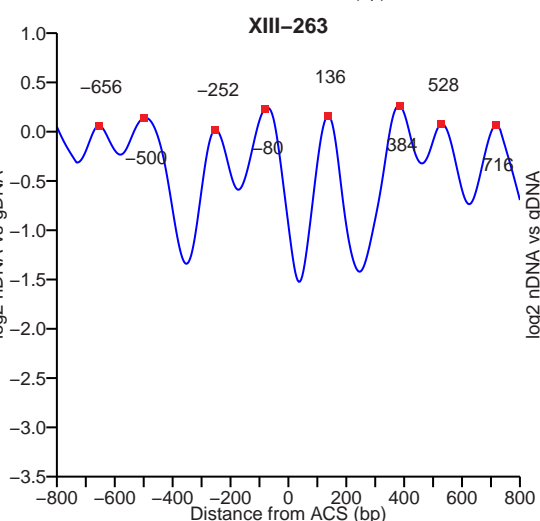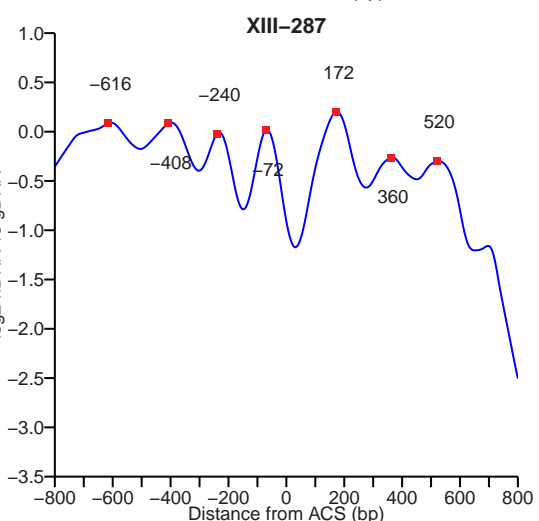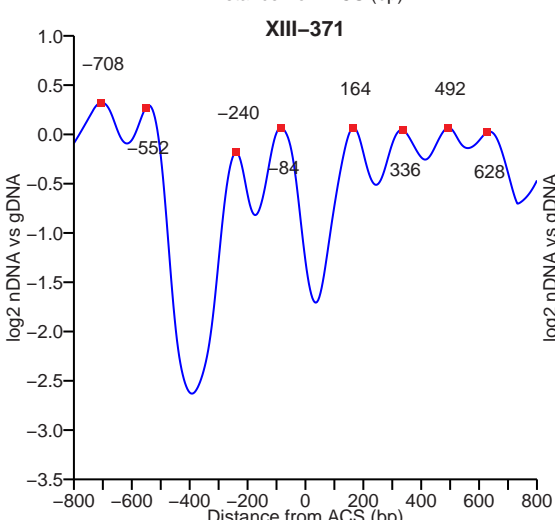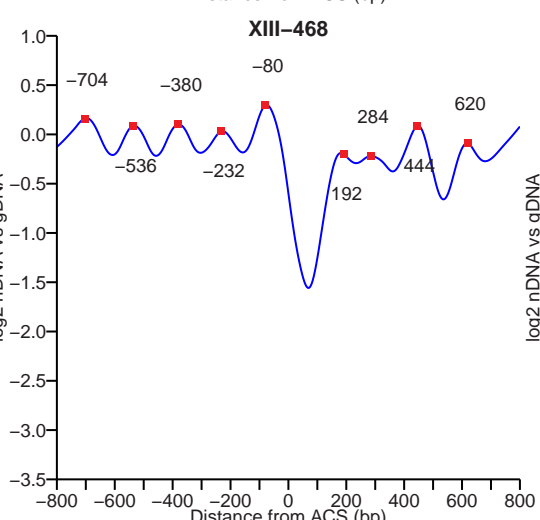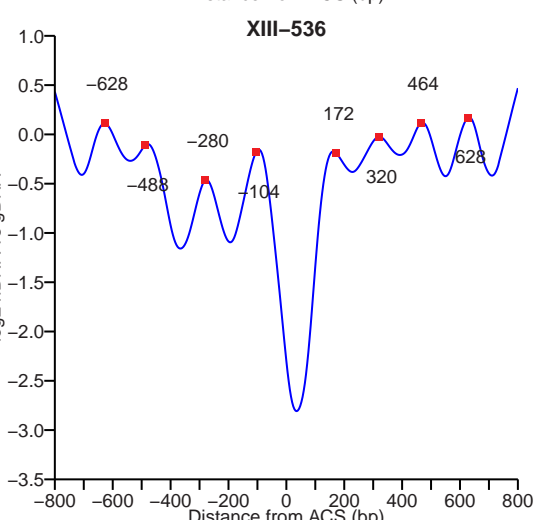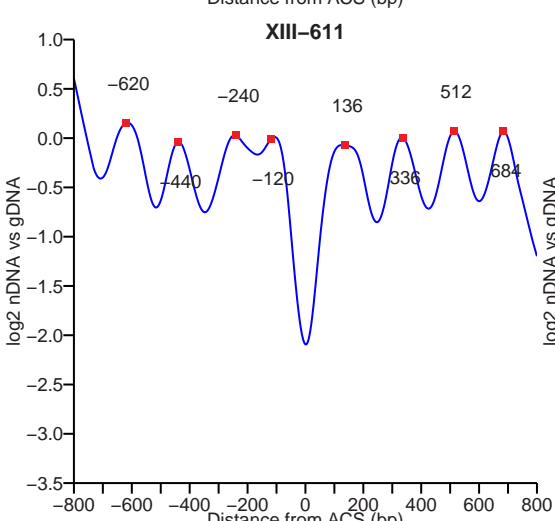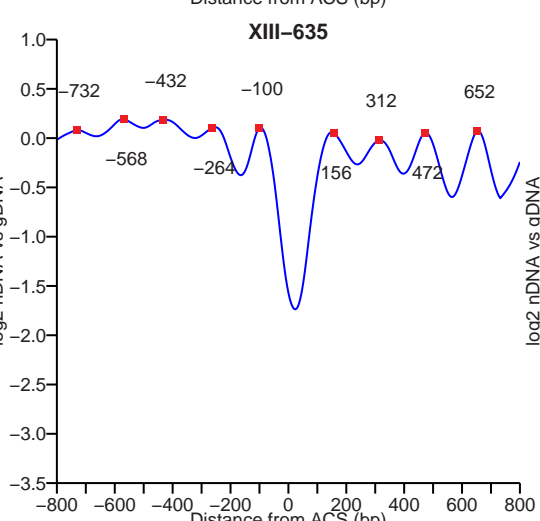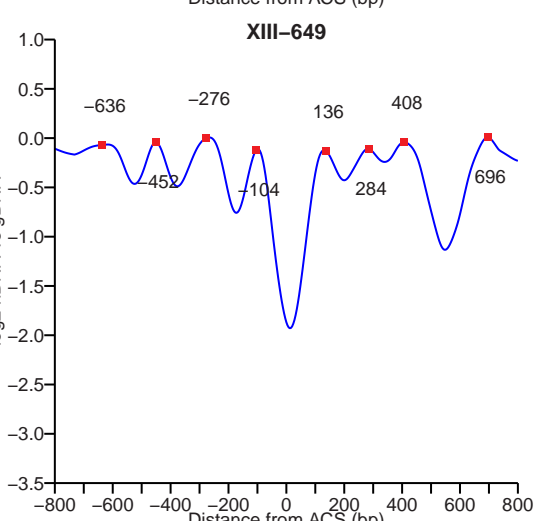

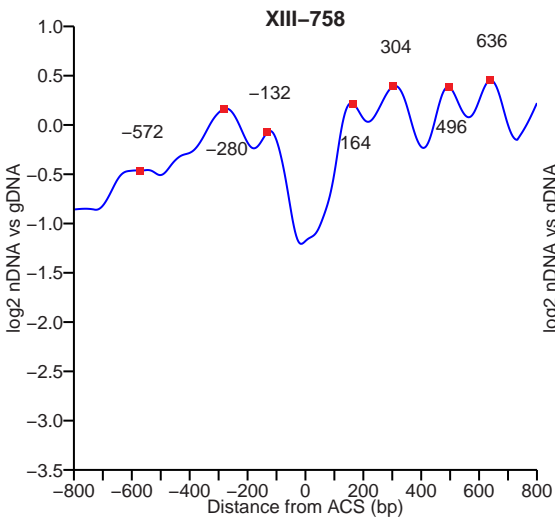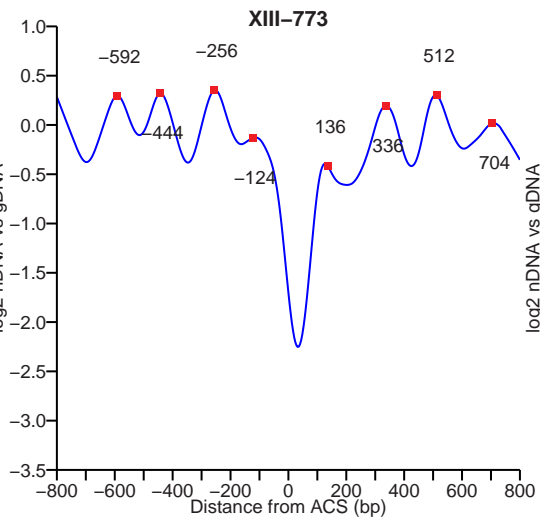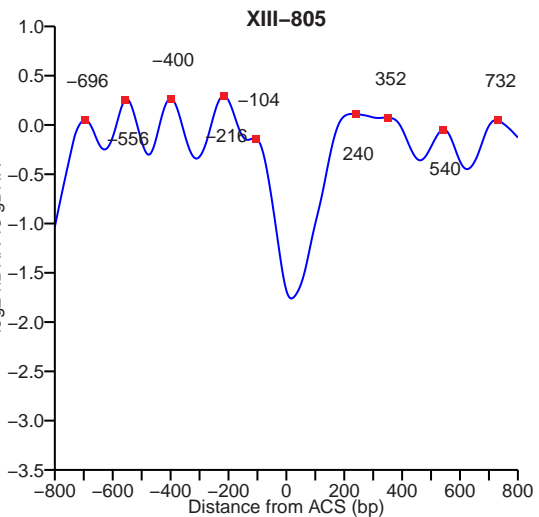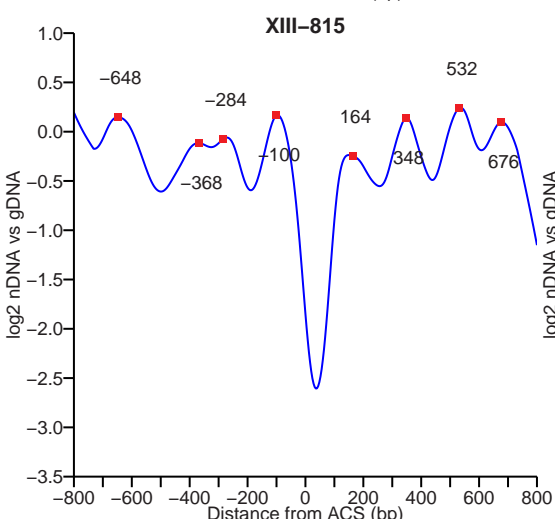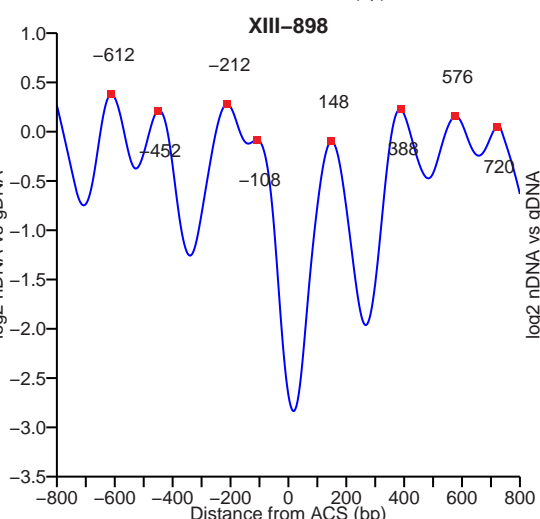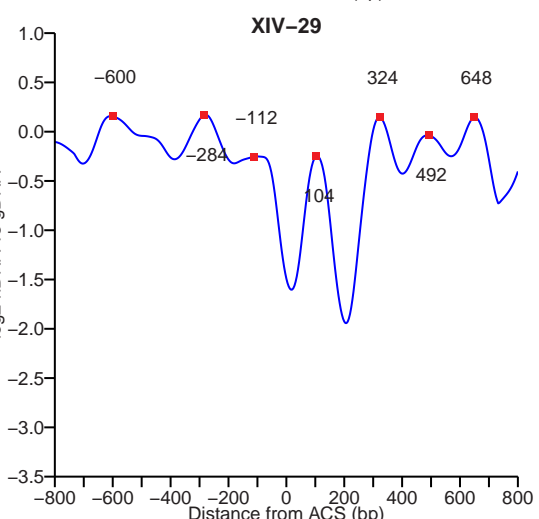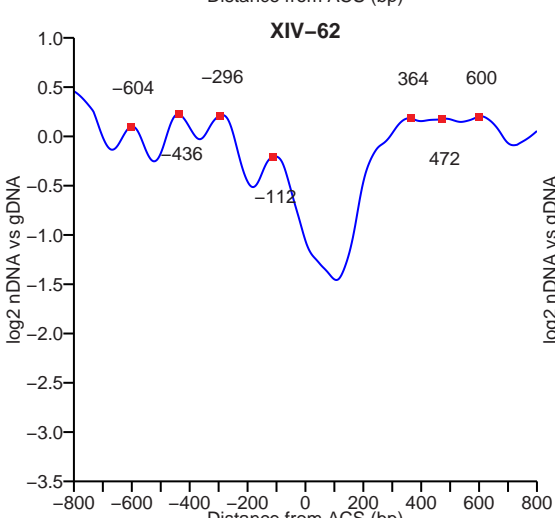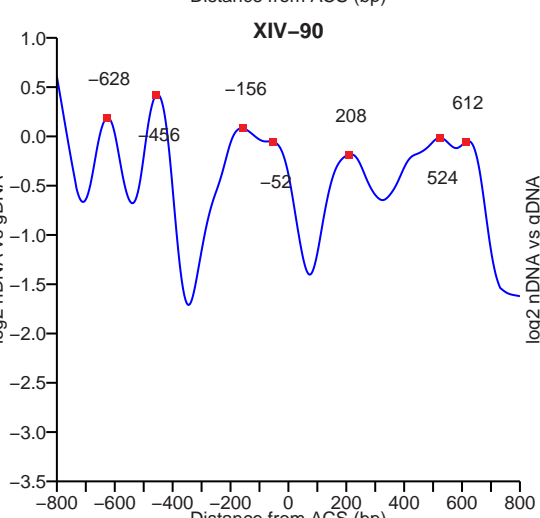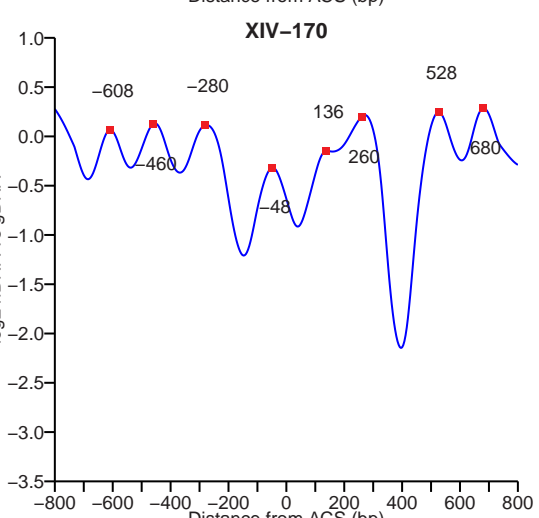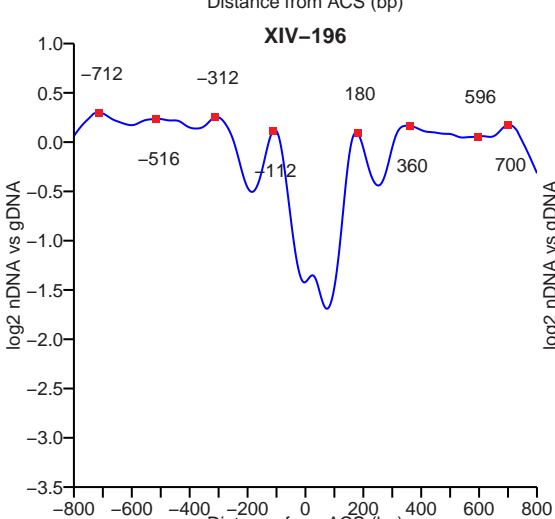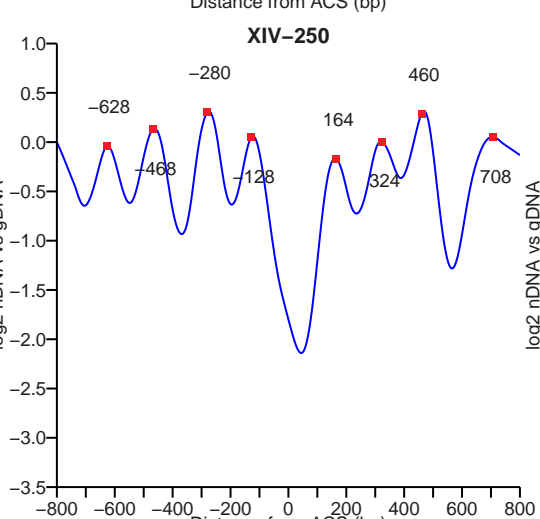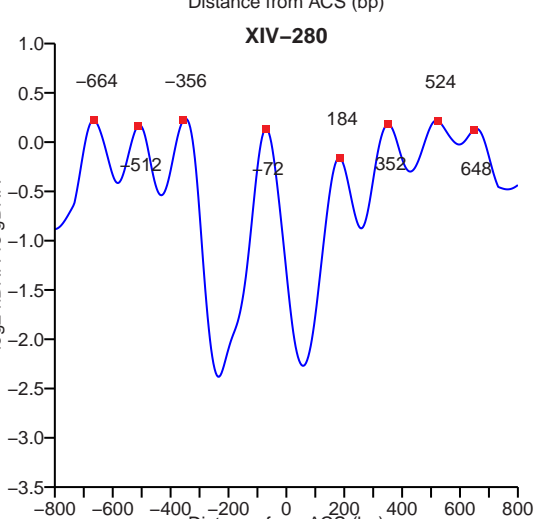

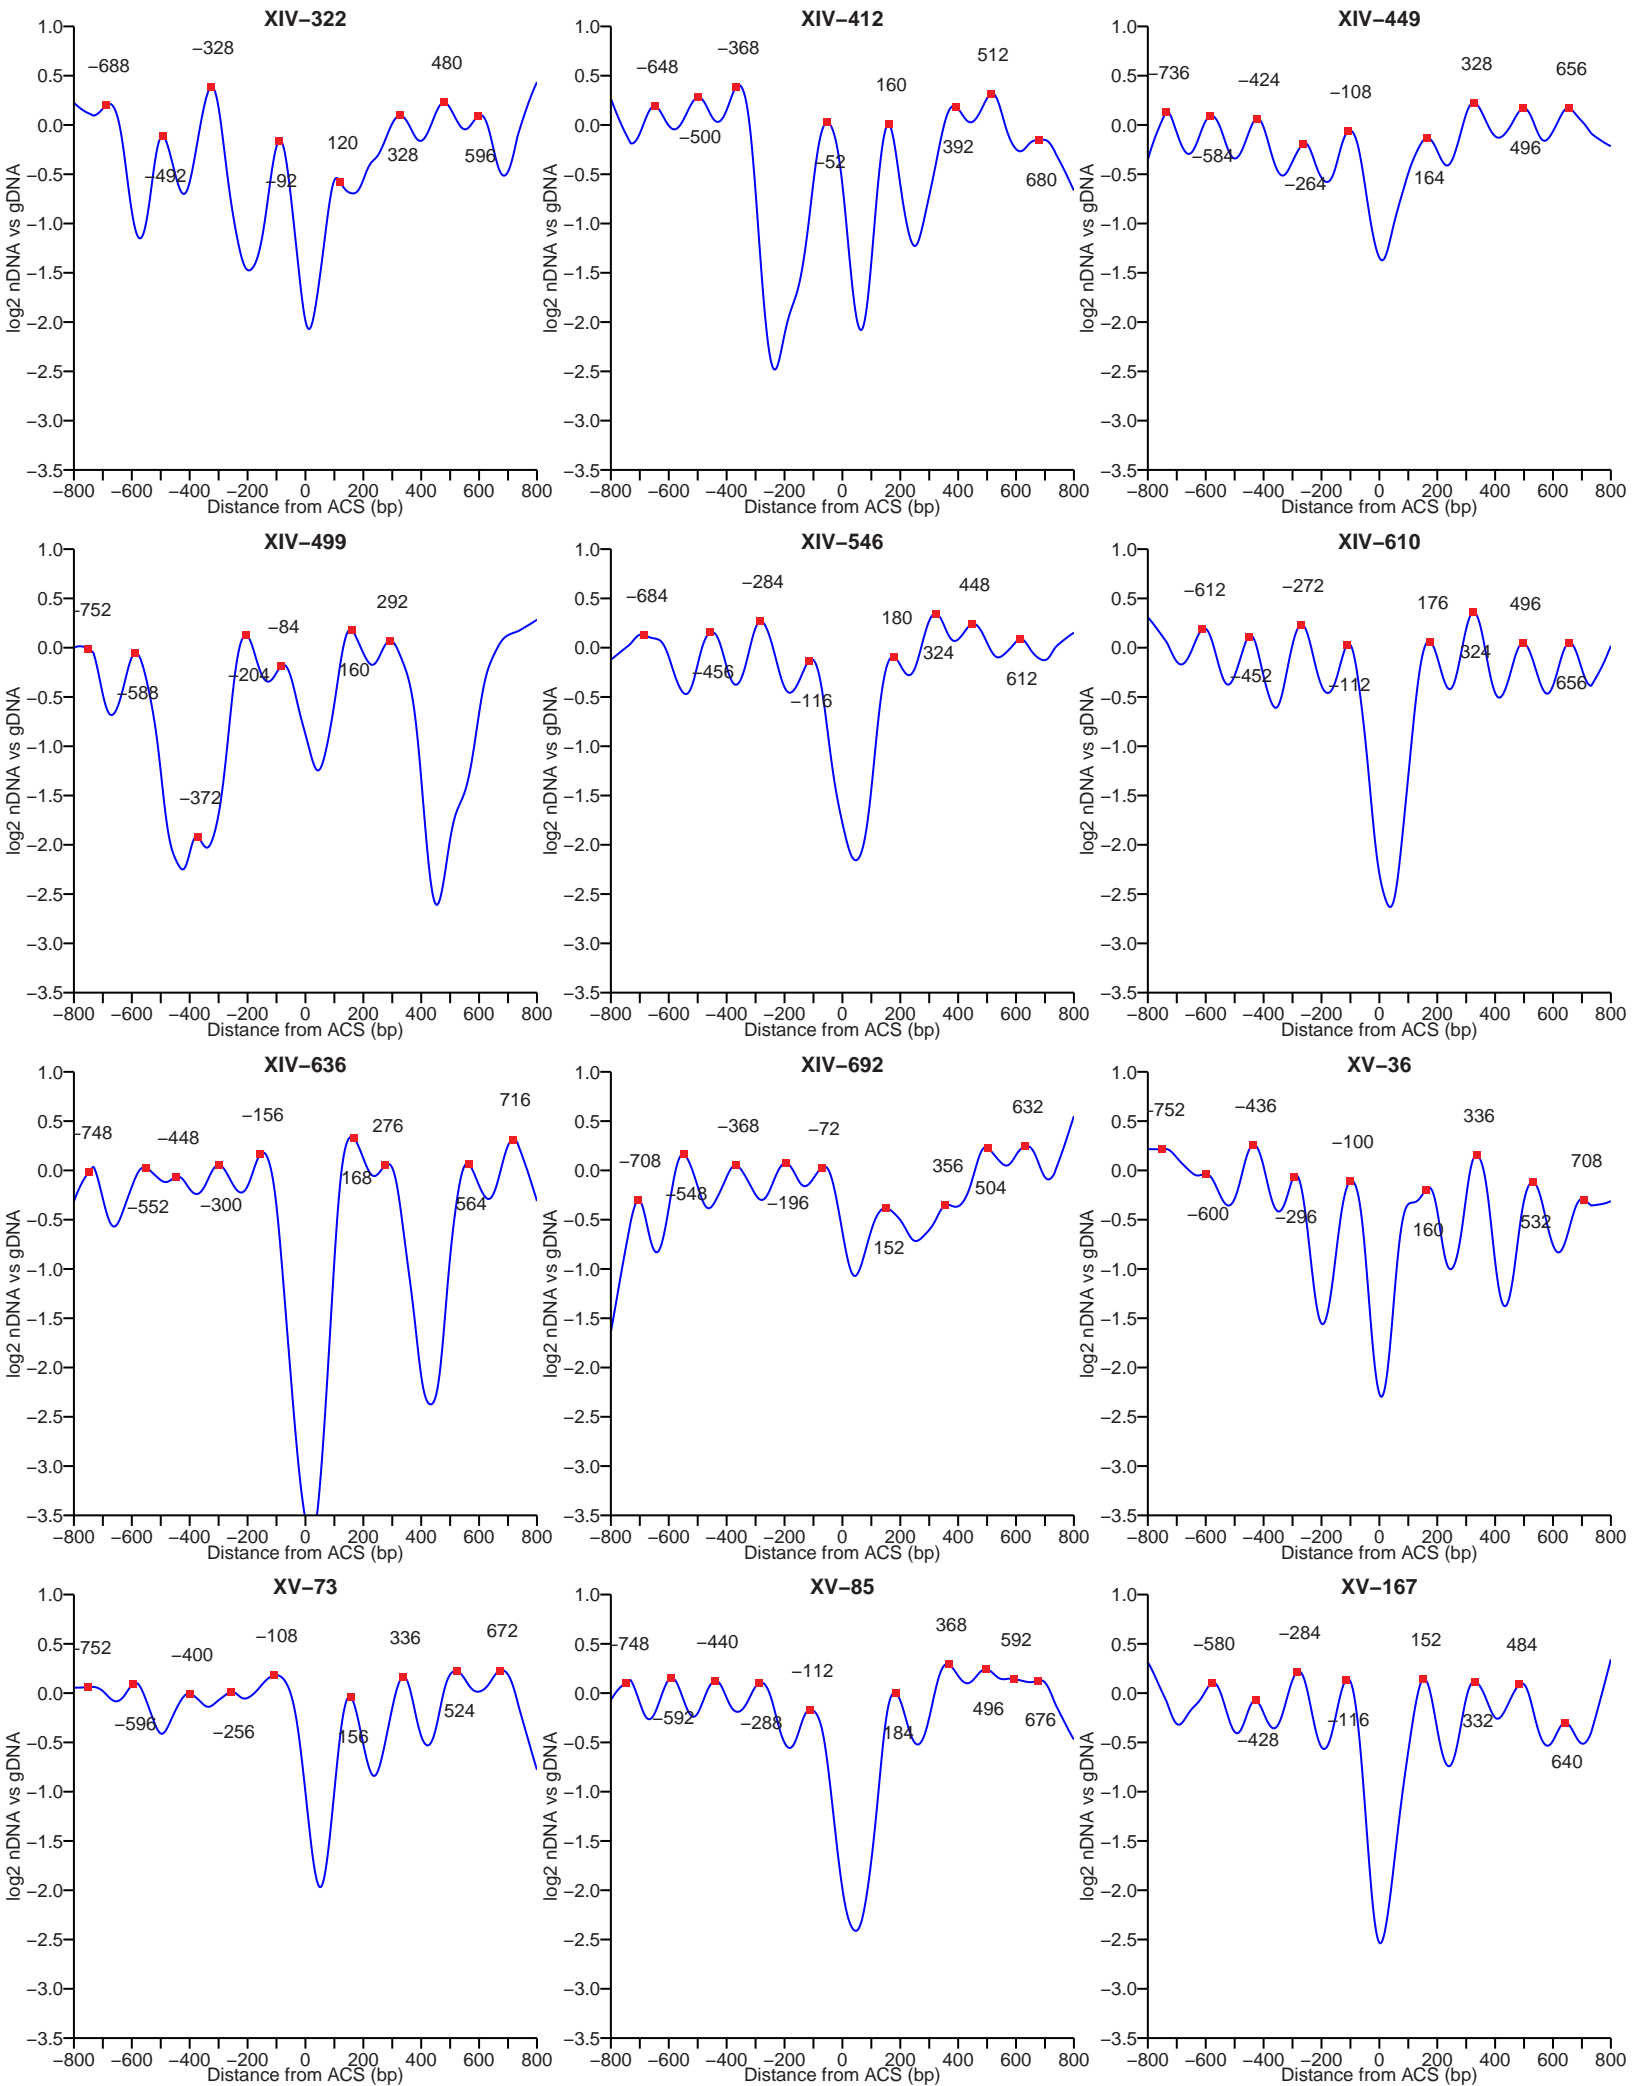



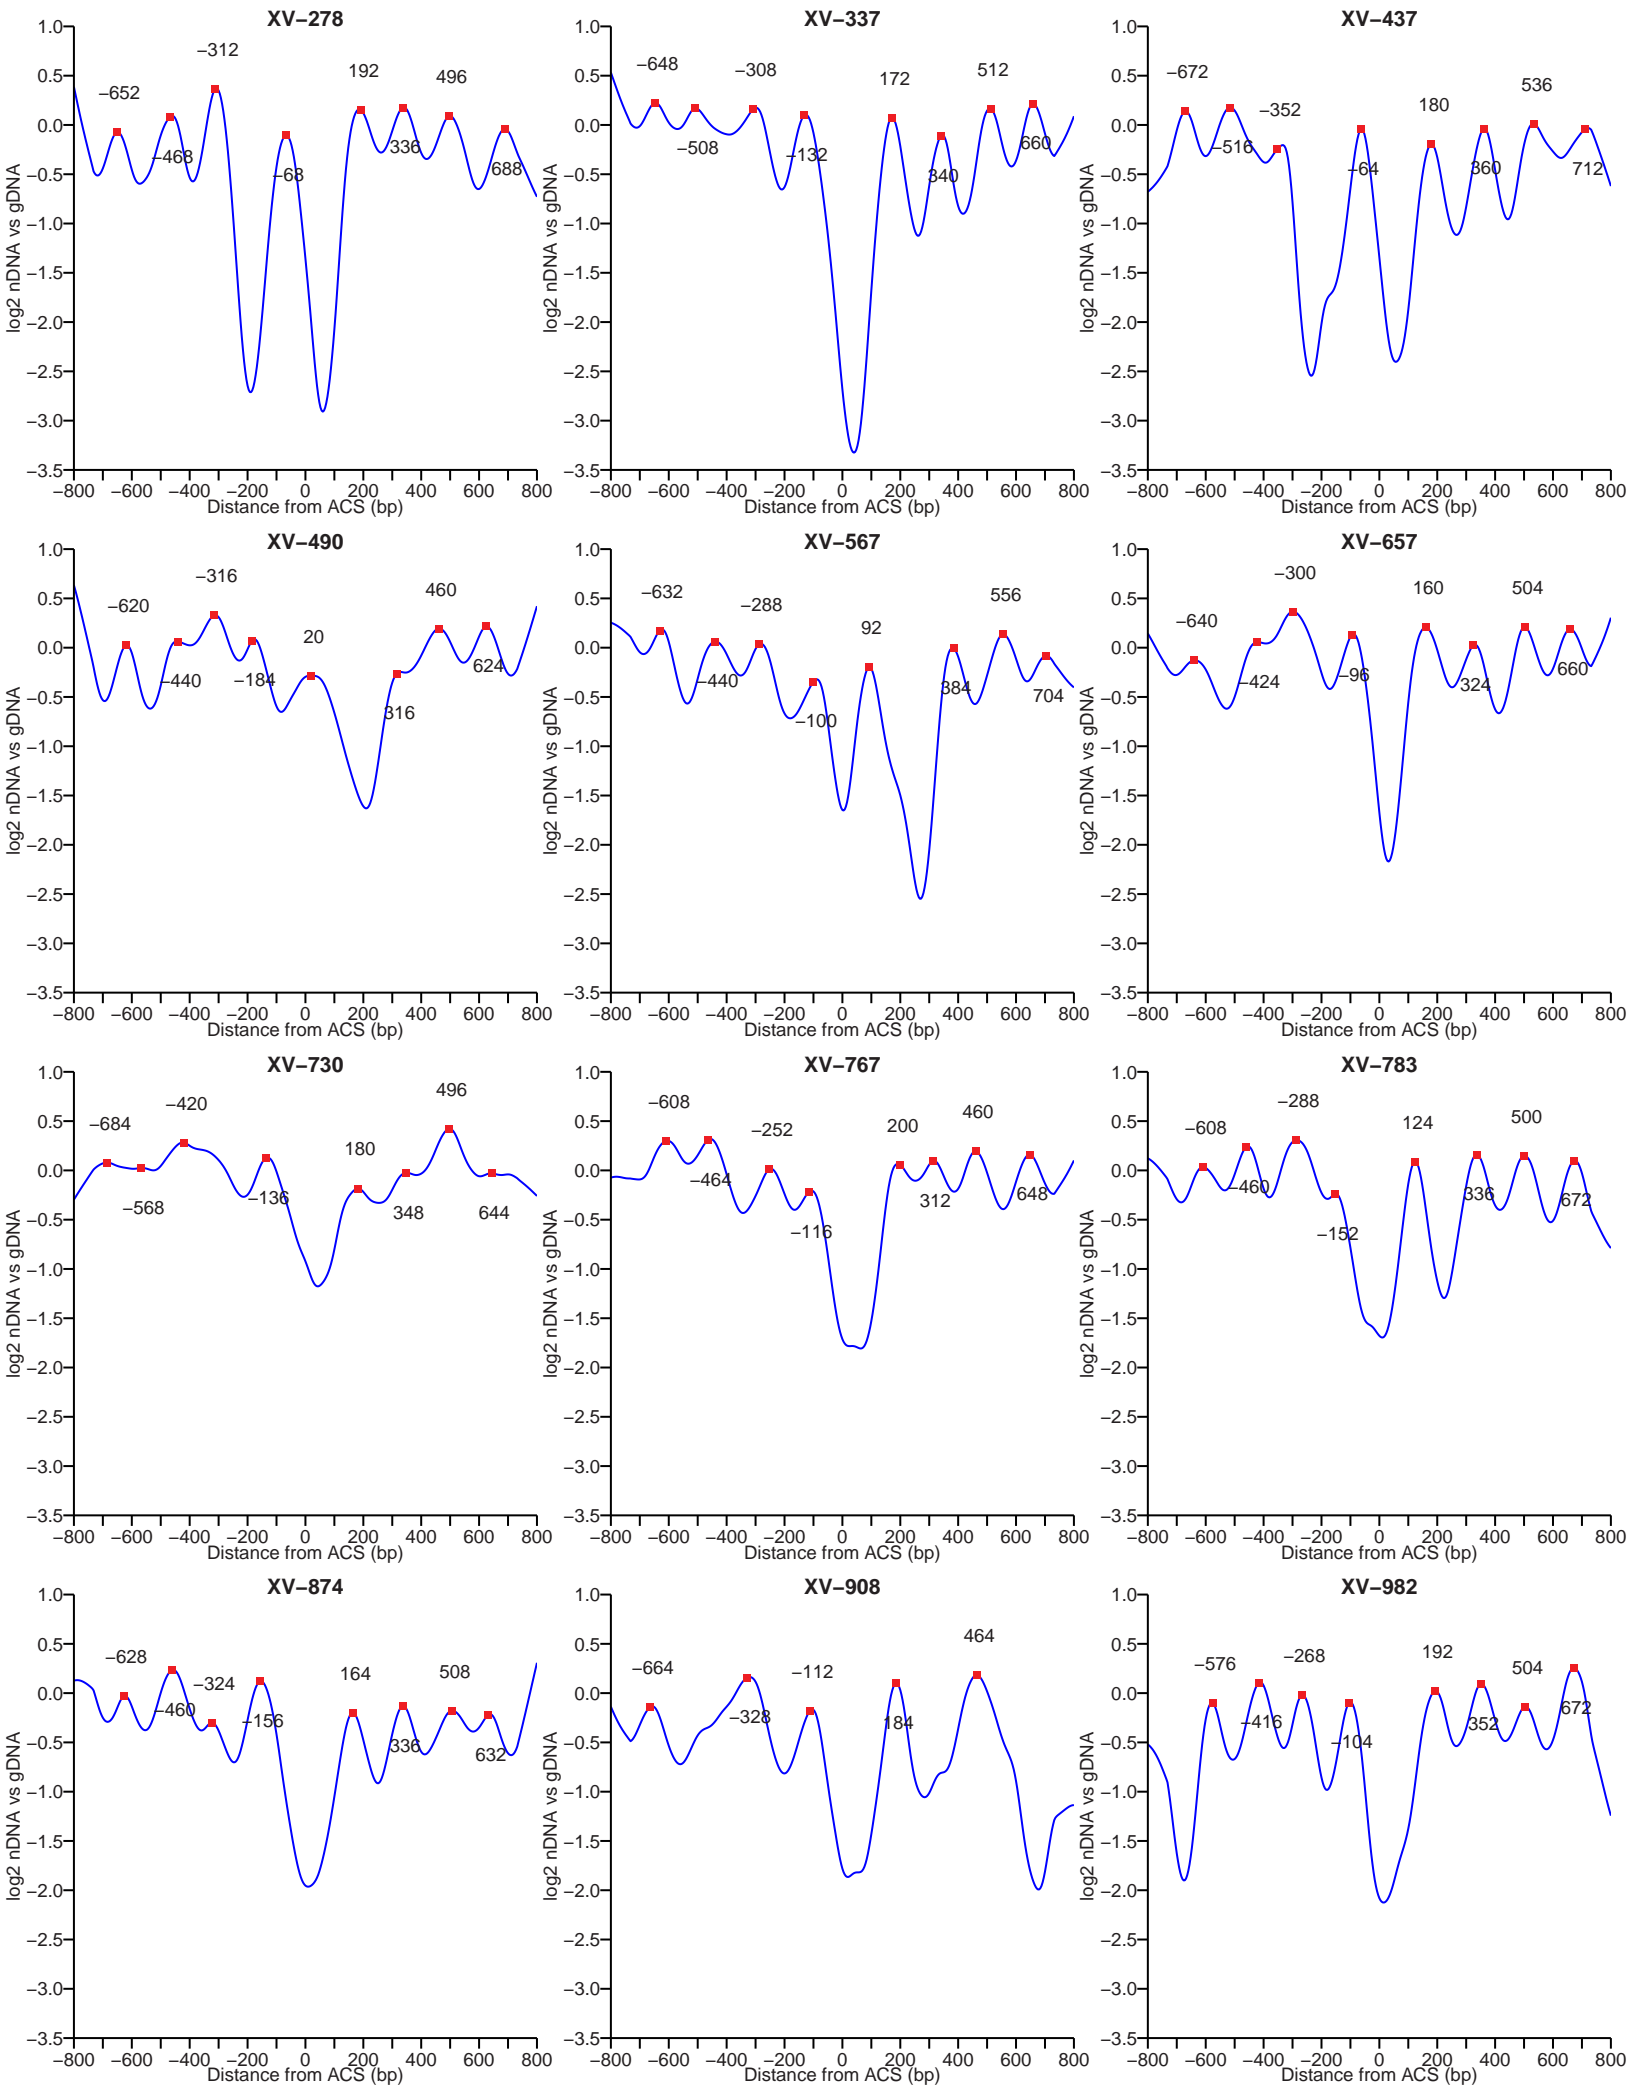

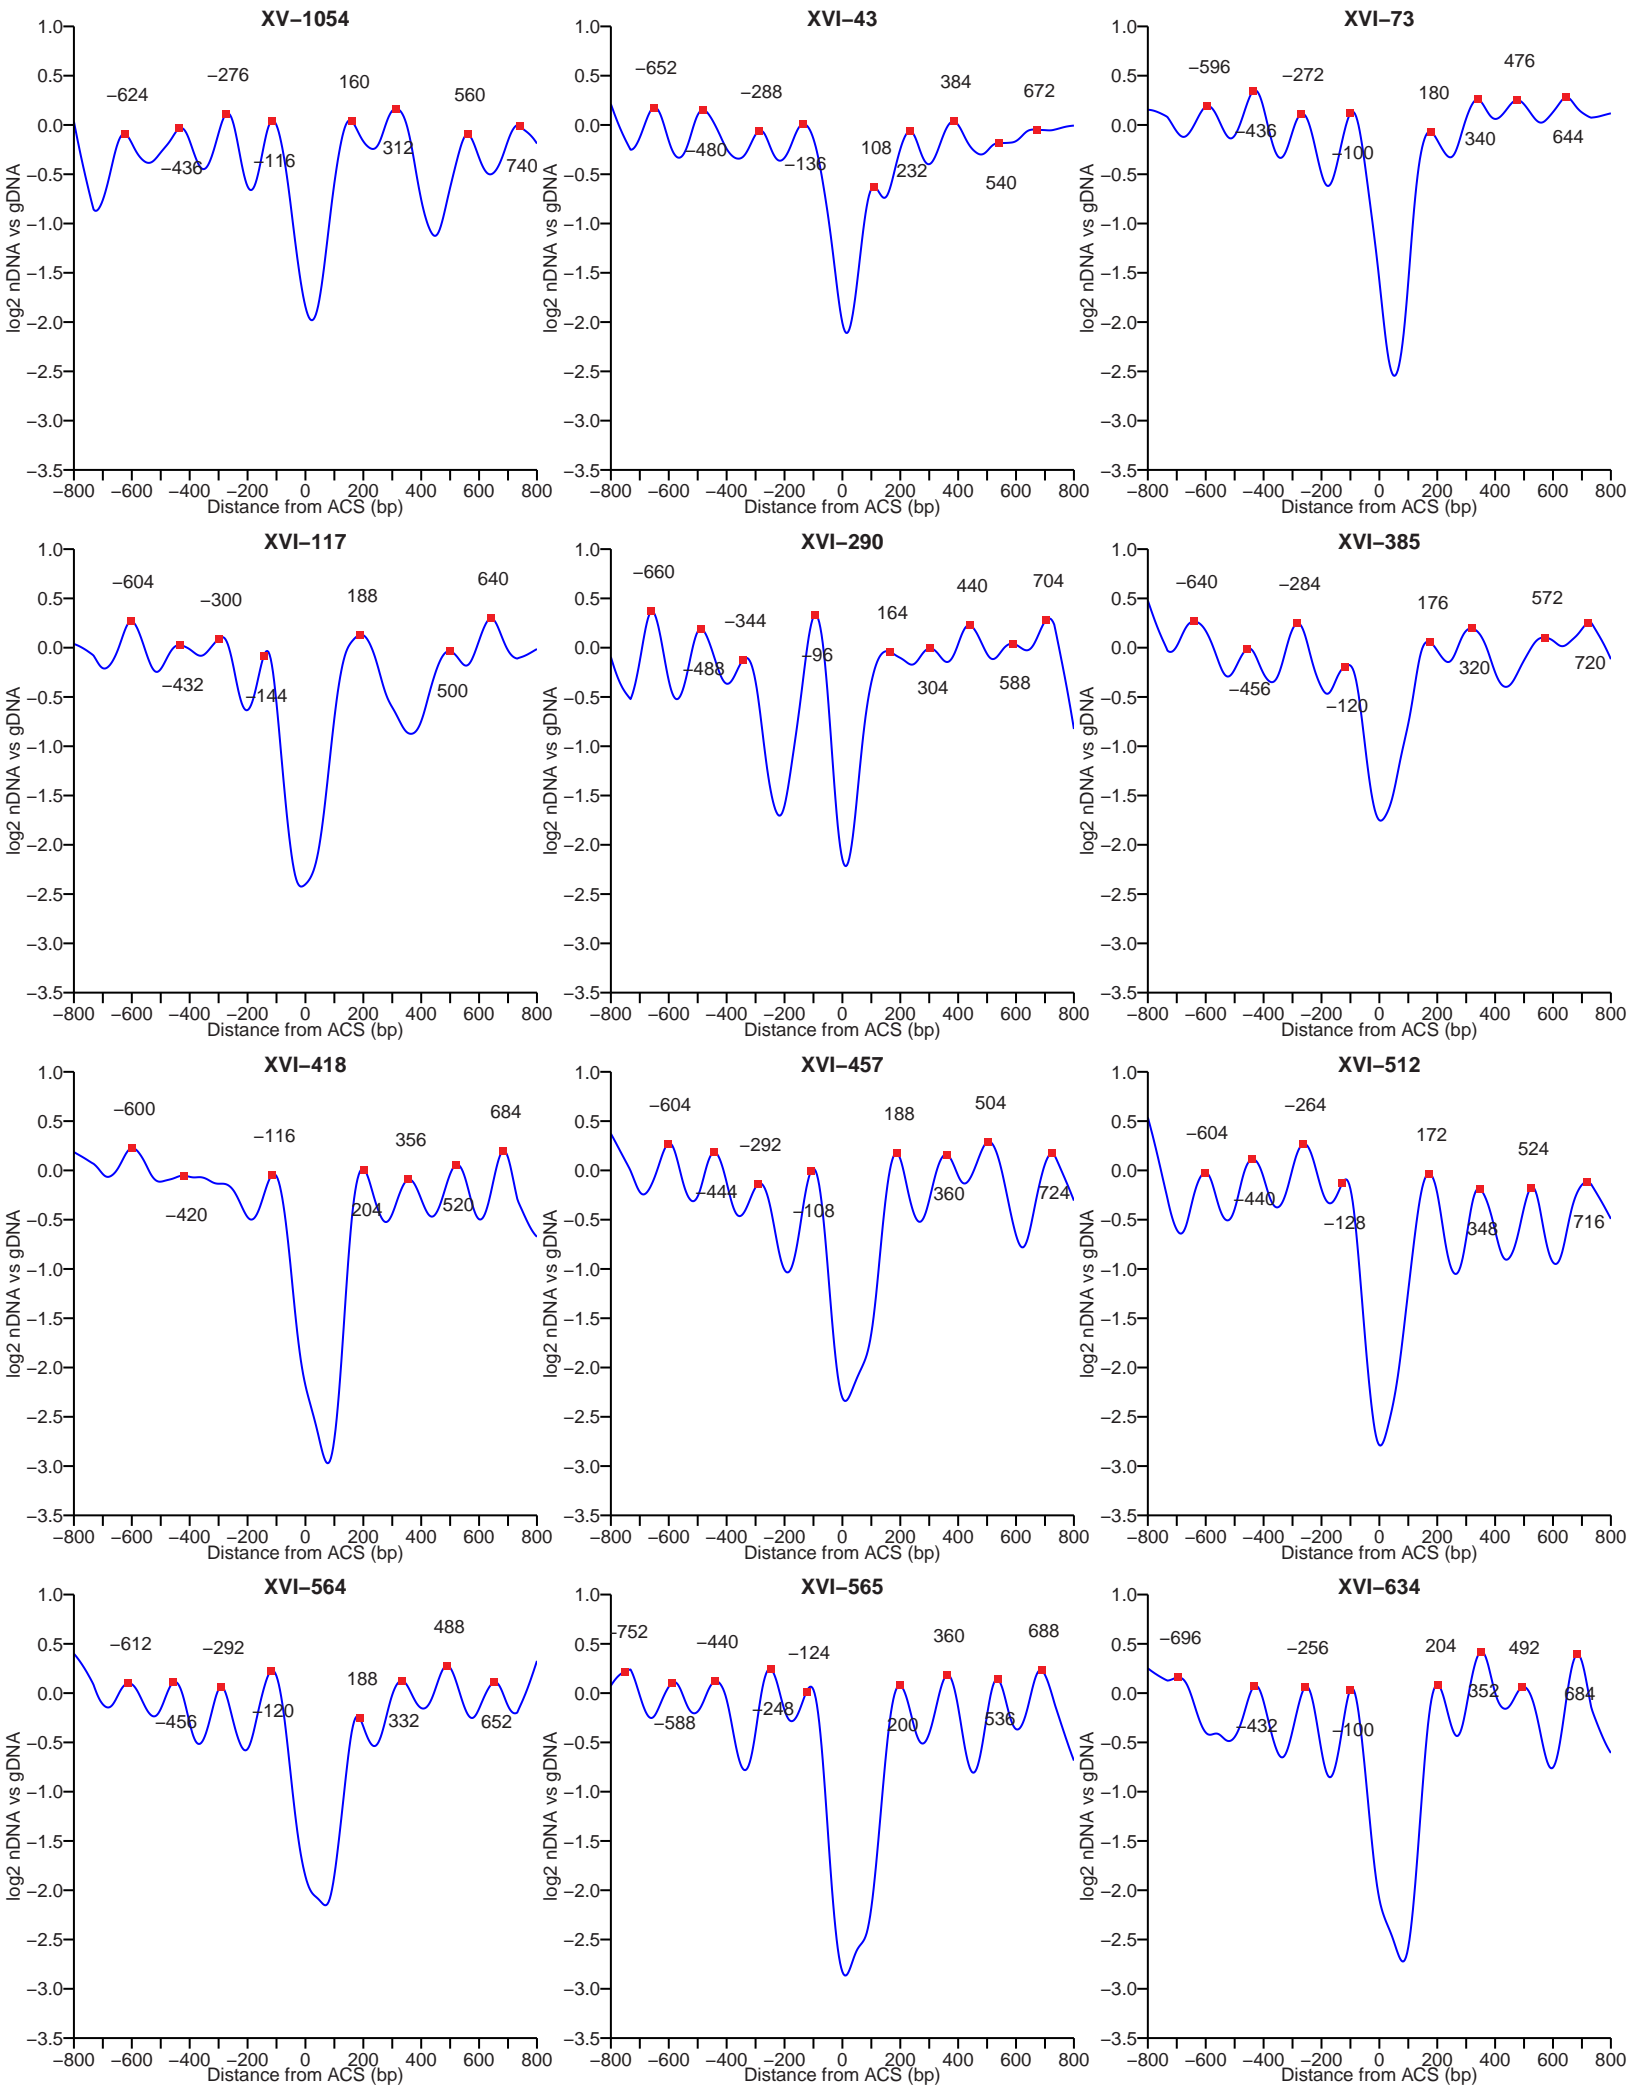

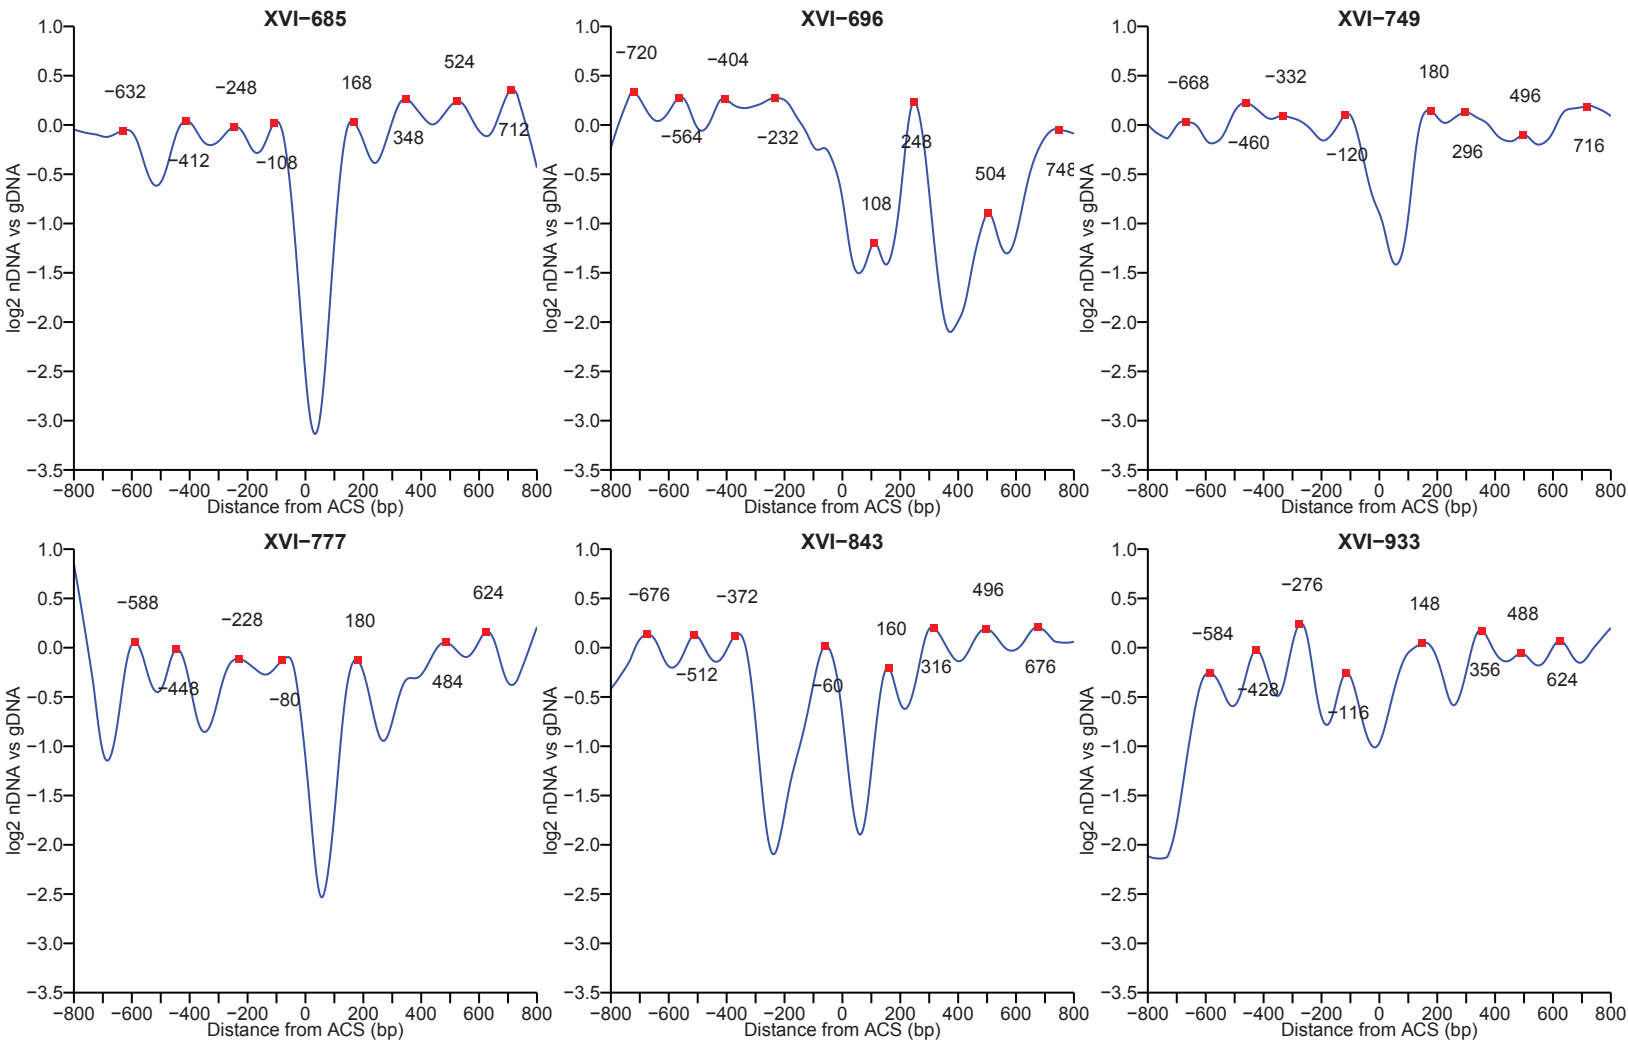

Figure S3. ACS-centered nucleosome profiles for each origin in the wild-type dataset. Individual origins were LOESS smoothed using a span which included 35 probes. The locations of nucleosome midpoints are indicated (■) and their locations relative to the ACS are indicated. Origin names are based on the naming conventions of OriDB [9].
