# Supplementary material for: Diversity of Eukaryotic DNA Replication Origins Revealed by Genome-Wide Analysis of Chromatin Structure
Source: PubMed Central journal article supplement (PMC2932696; doi:10.1371/journal.pgen.1001092), 2010-09-02
Supplement: pgen.1001092.s004.pdf [file pgen.1001092.s004.pdf]

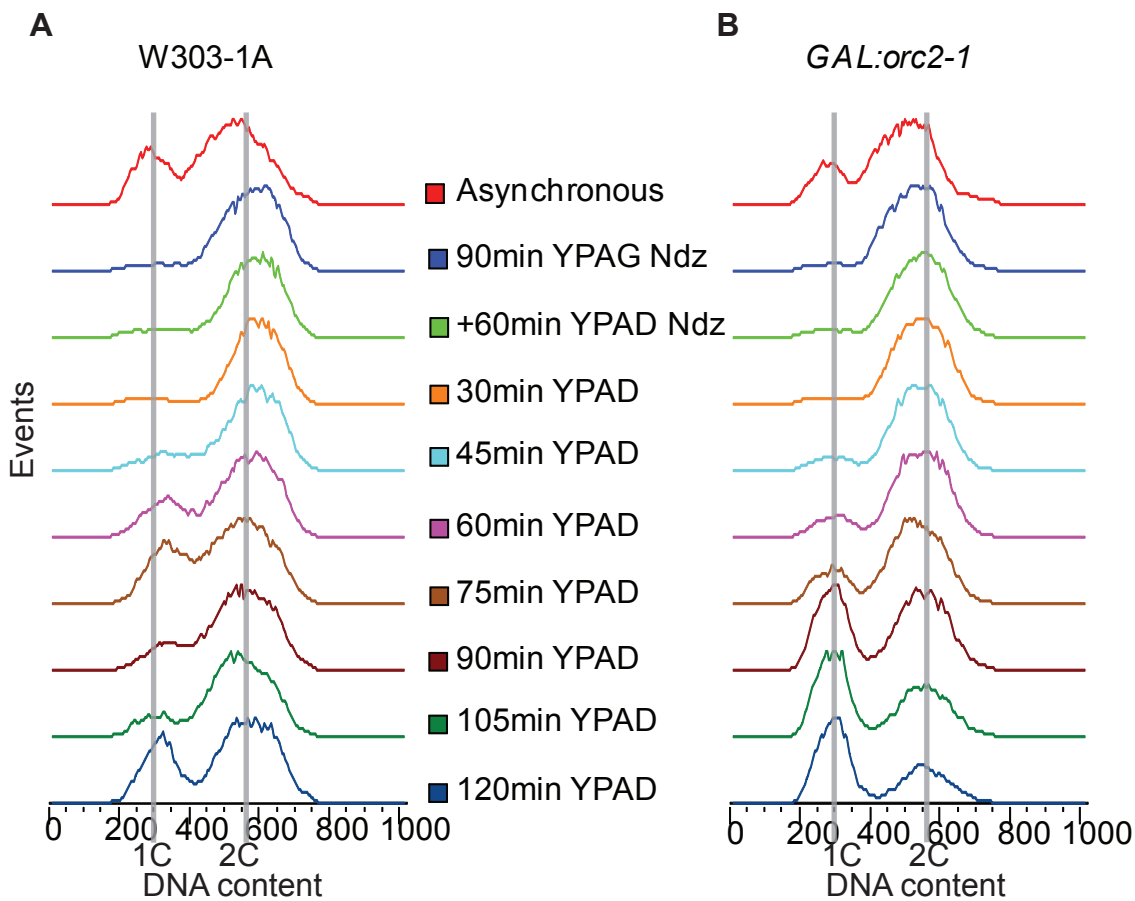

Figure S4. Flow cytometric analysis of DNA content during Orc2 depletion. A. The wild type control strain. B. The *Orc2* depletion strain. Both strains were arrested in G2 in nocodazole (NDZ) in galactose medium (YPAG) to allow expression of *Orc2*. Glucose was added (YPAD) to shut off *Orc2*. After 60 minutes cells were released into the cell cycle in glucose to continually repress *Orc2* expression. The wild type cells enter mitosis between 45 and 60 minutes post-release, as evidenced by the appearance of 1C cells (corresponding to G1 cells). They then progress rapidly through S phase, arriving at a 2C (G2) DNA content by 90 to 105 minutes. By contrast, after passing through mitosis, the *GAL:orc2-1* cells accumulate in G1, indicating that they are unable to enter S phase due to the absence of *Orc2*. Cells were cross-linked at 120 minutes post-release for preparation of nucleosomal DNA.
