# Supplementary material for: Diversity of Eukaryotic DNA Replication Origins Revealed by Genome-Wide Analysis of Chromatin Structure
Source: PubMed Central journal article supplement (PMC2932696; doi:10.1371/journal.pgen.1001092), 2010-09-02
Supplement: pgen.1001092.s006.pdf [file pgen.1001092.s006.pdf]

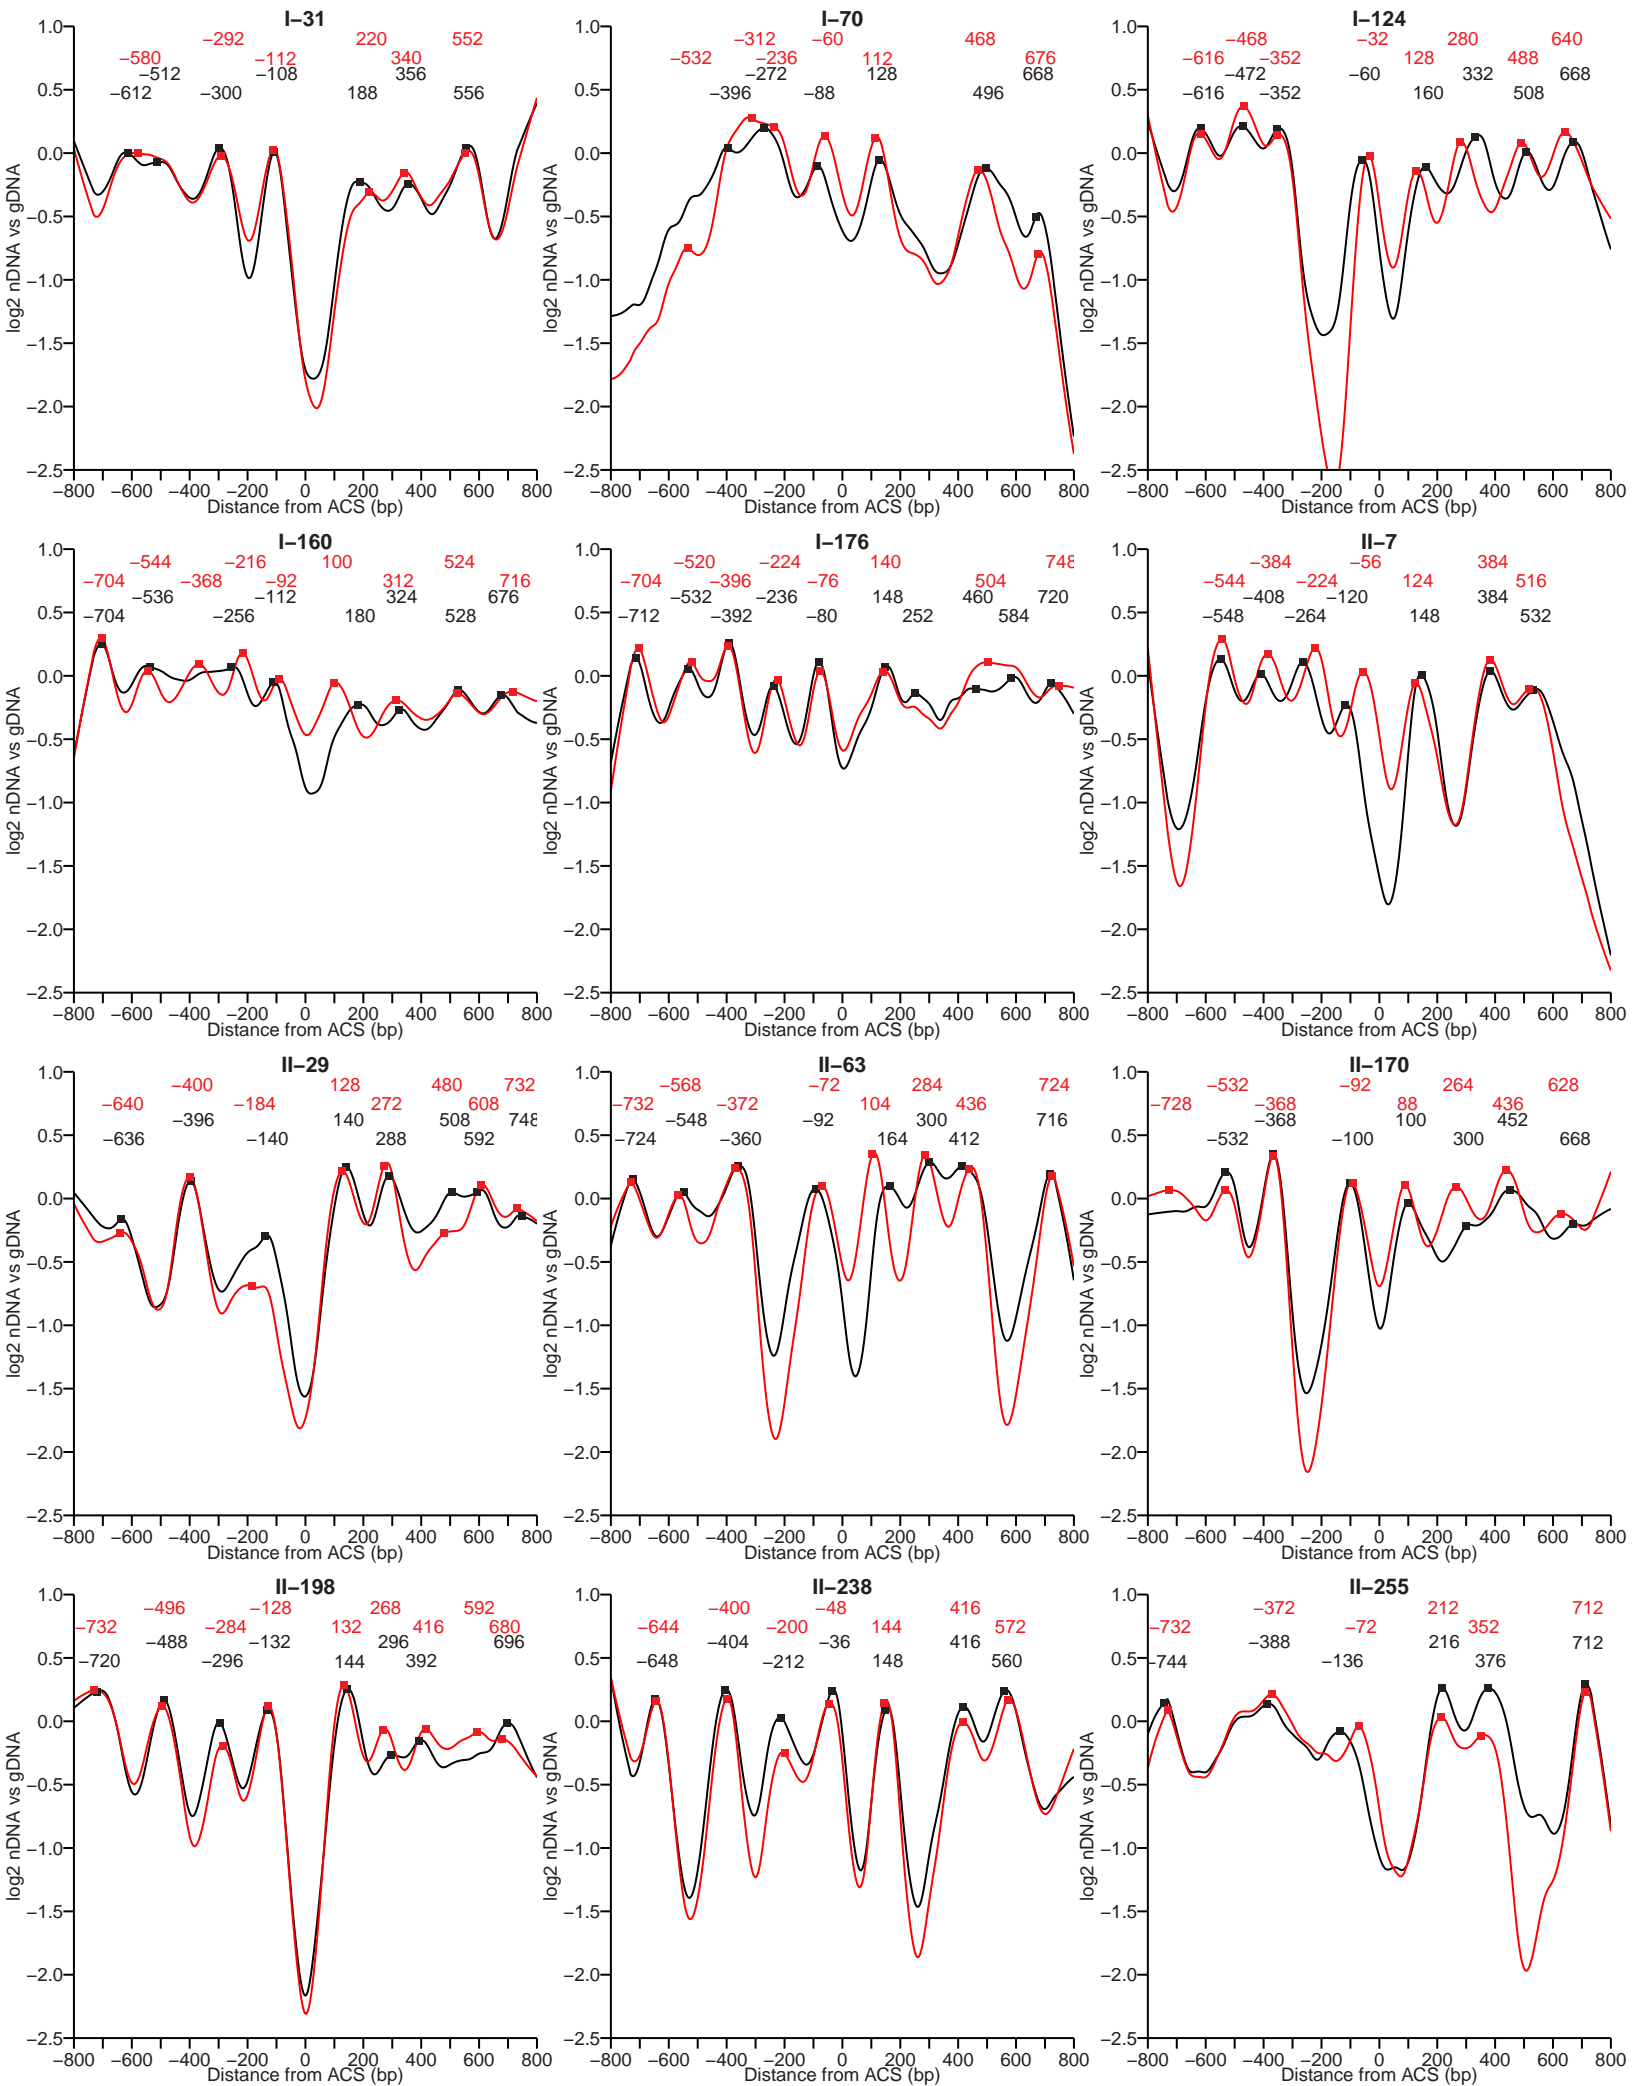

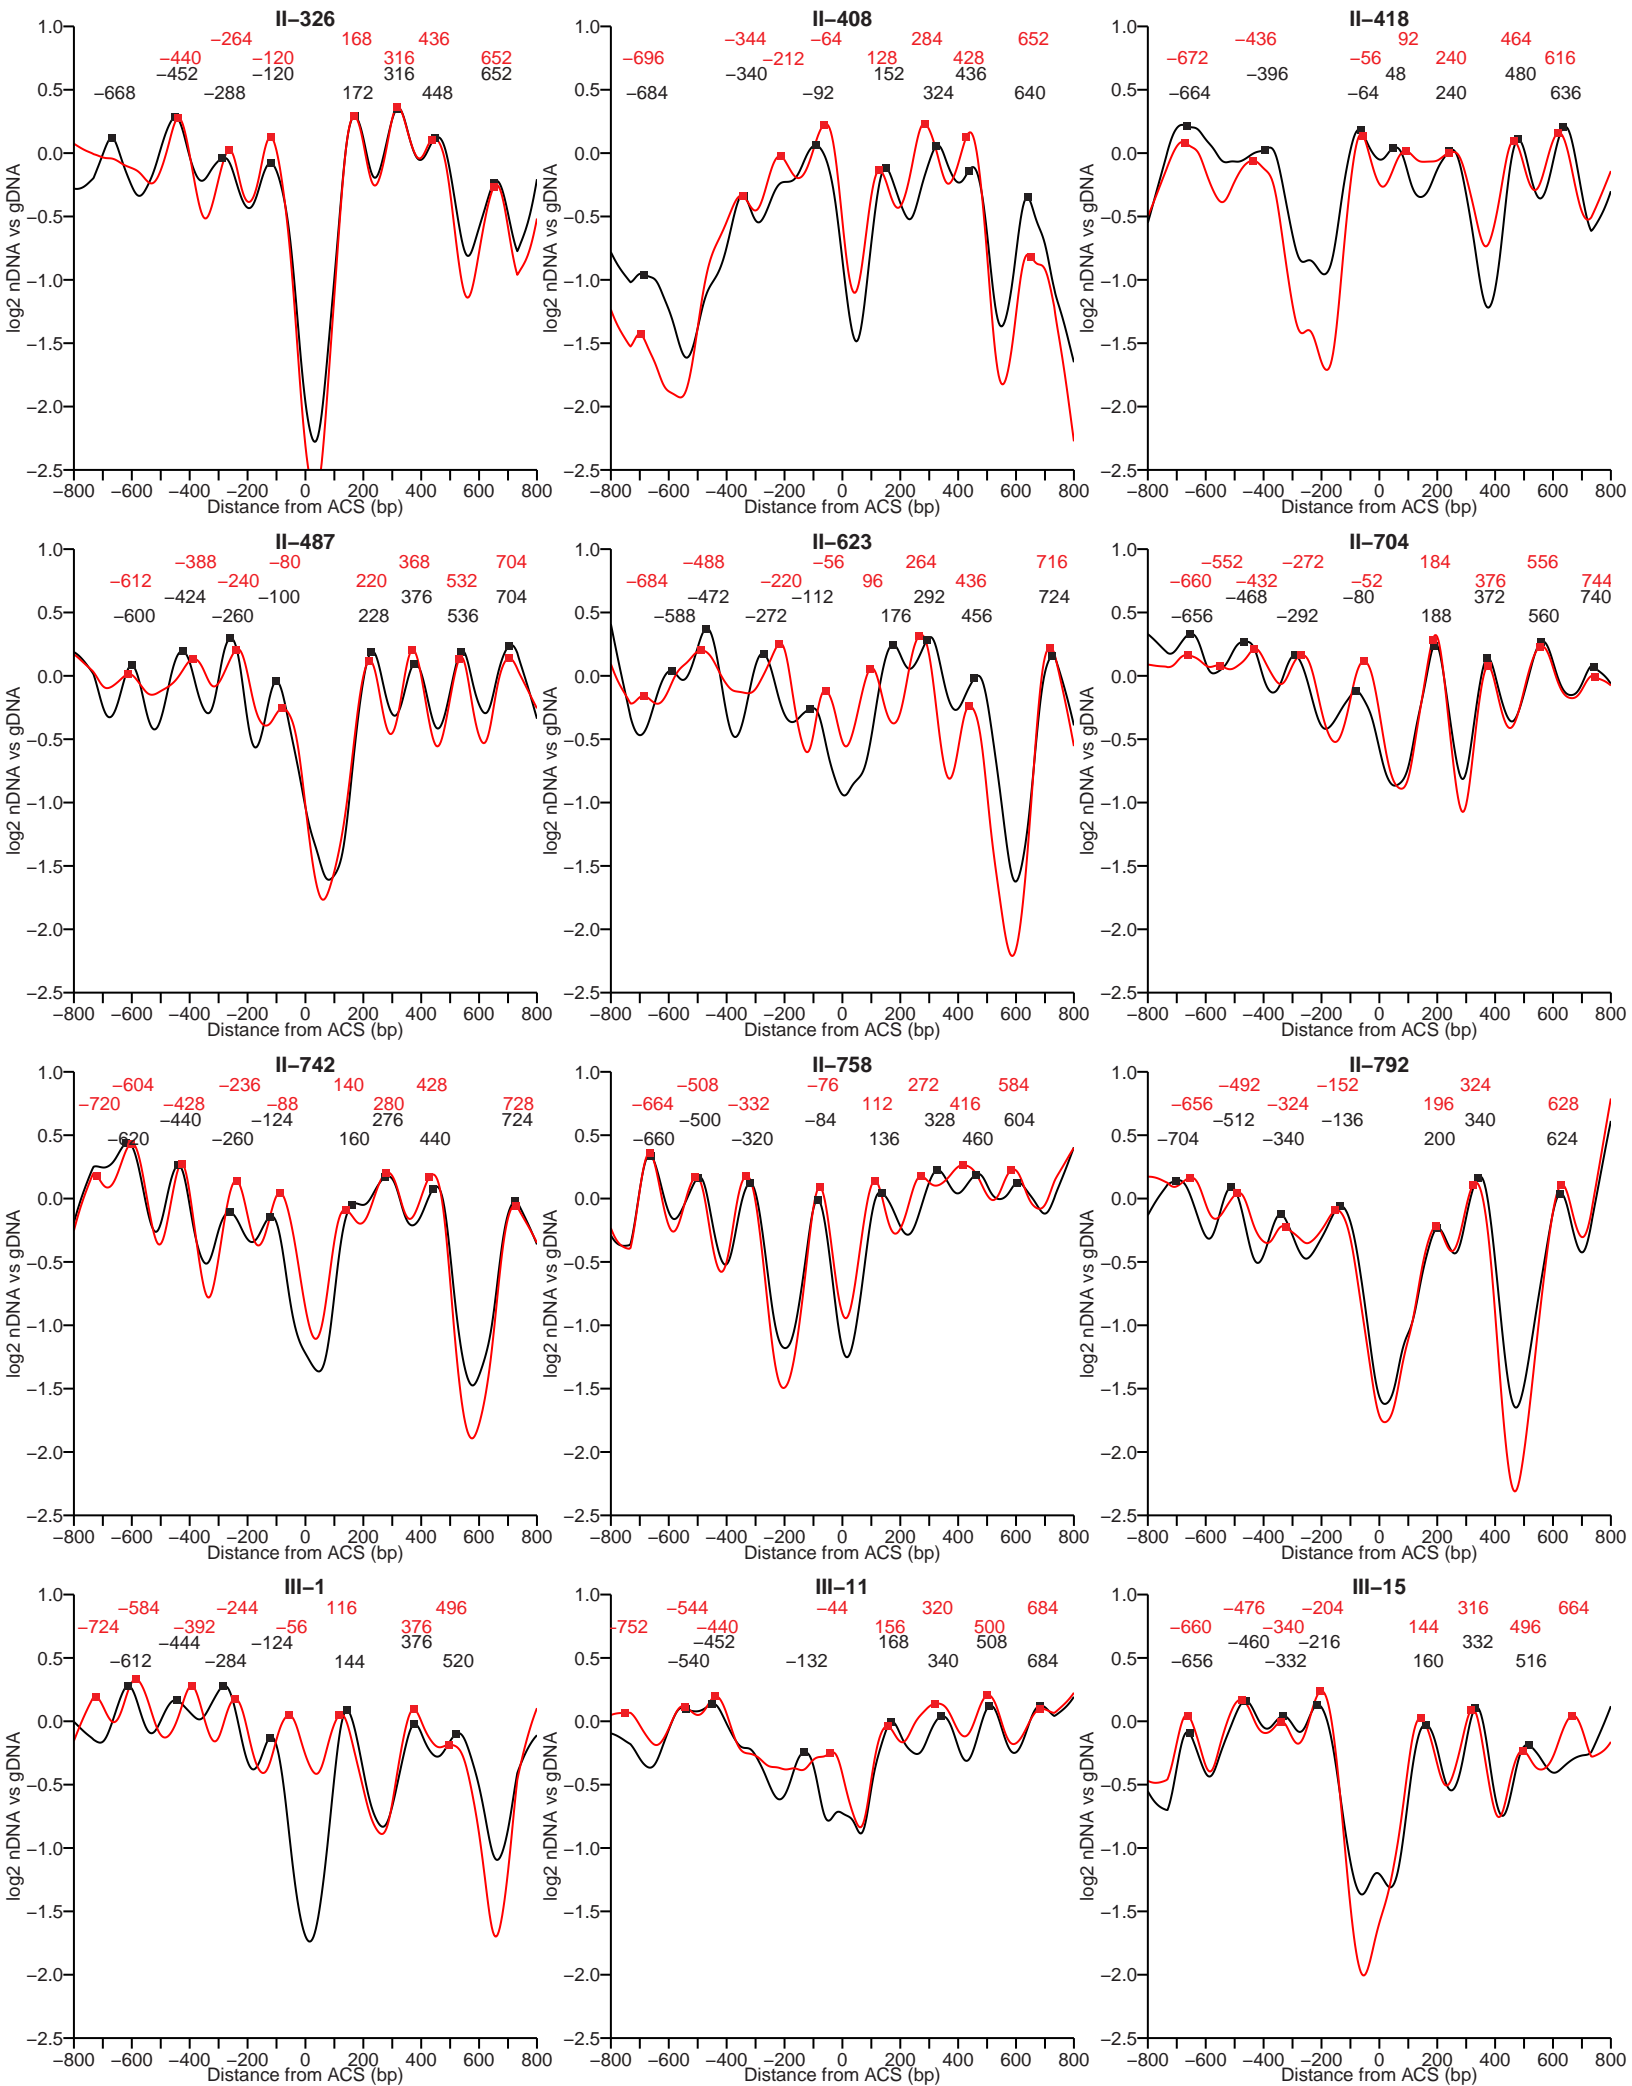

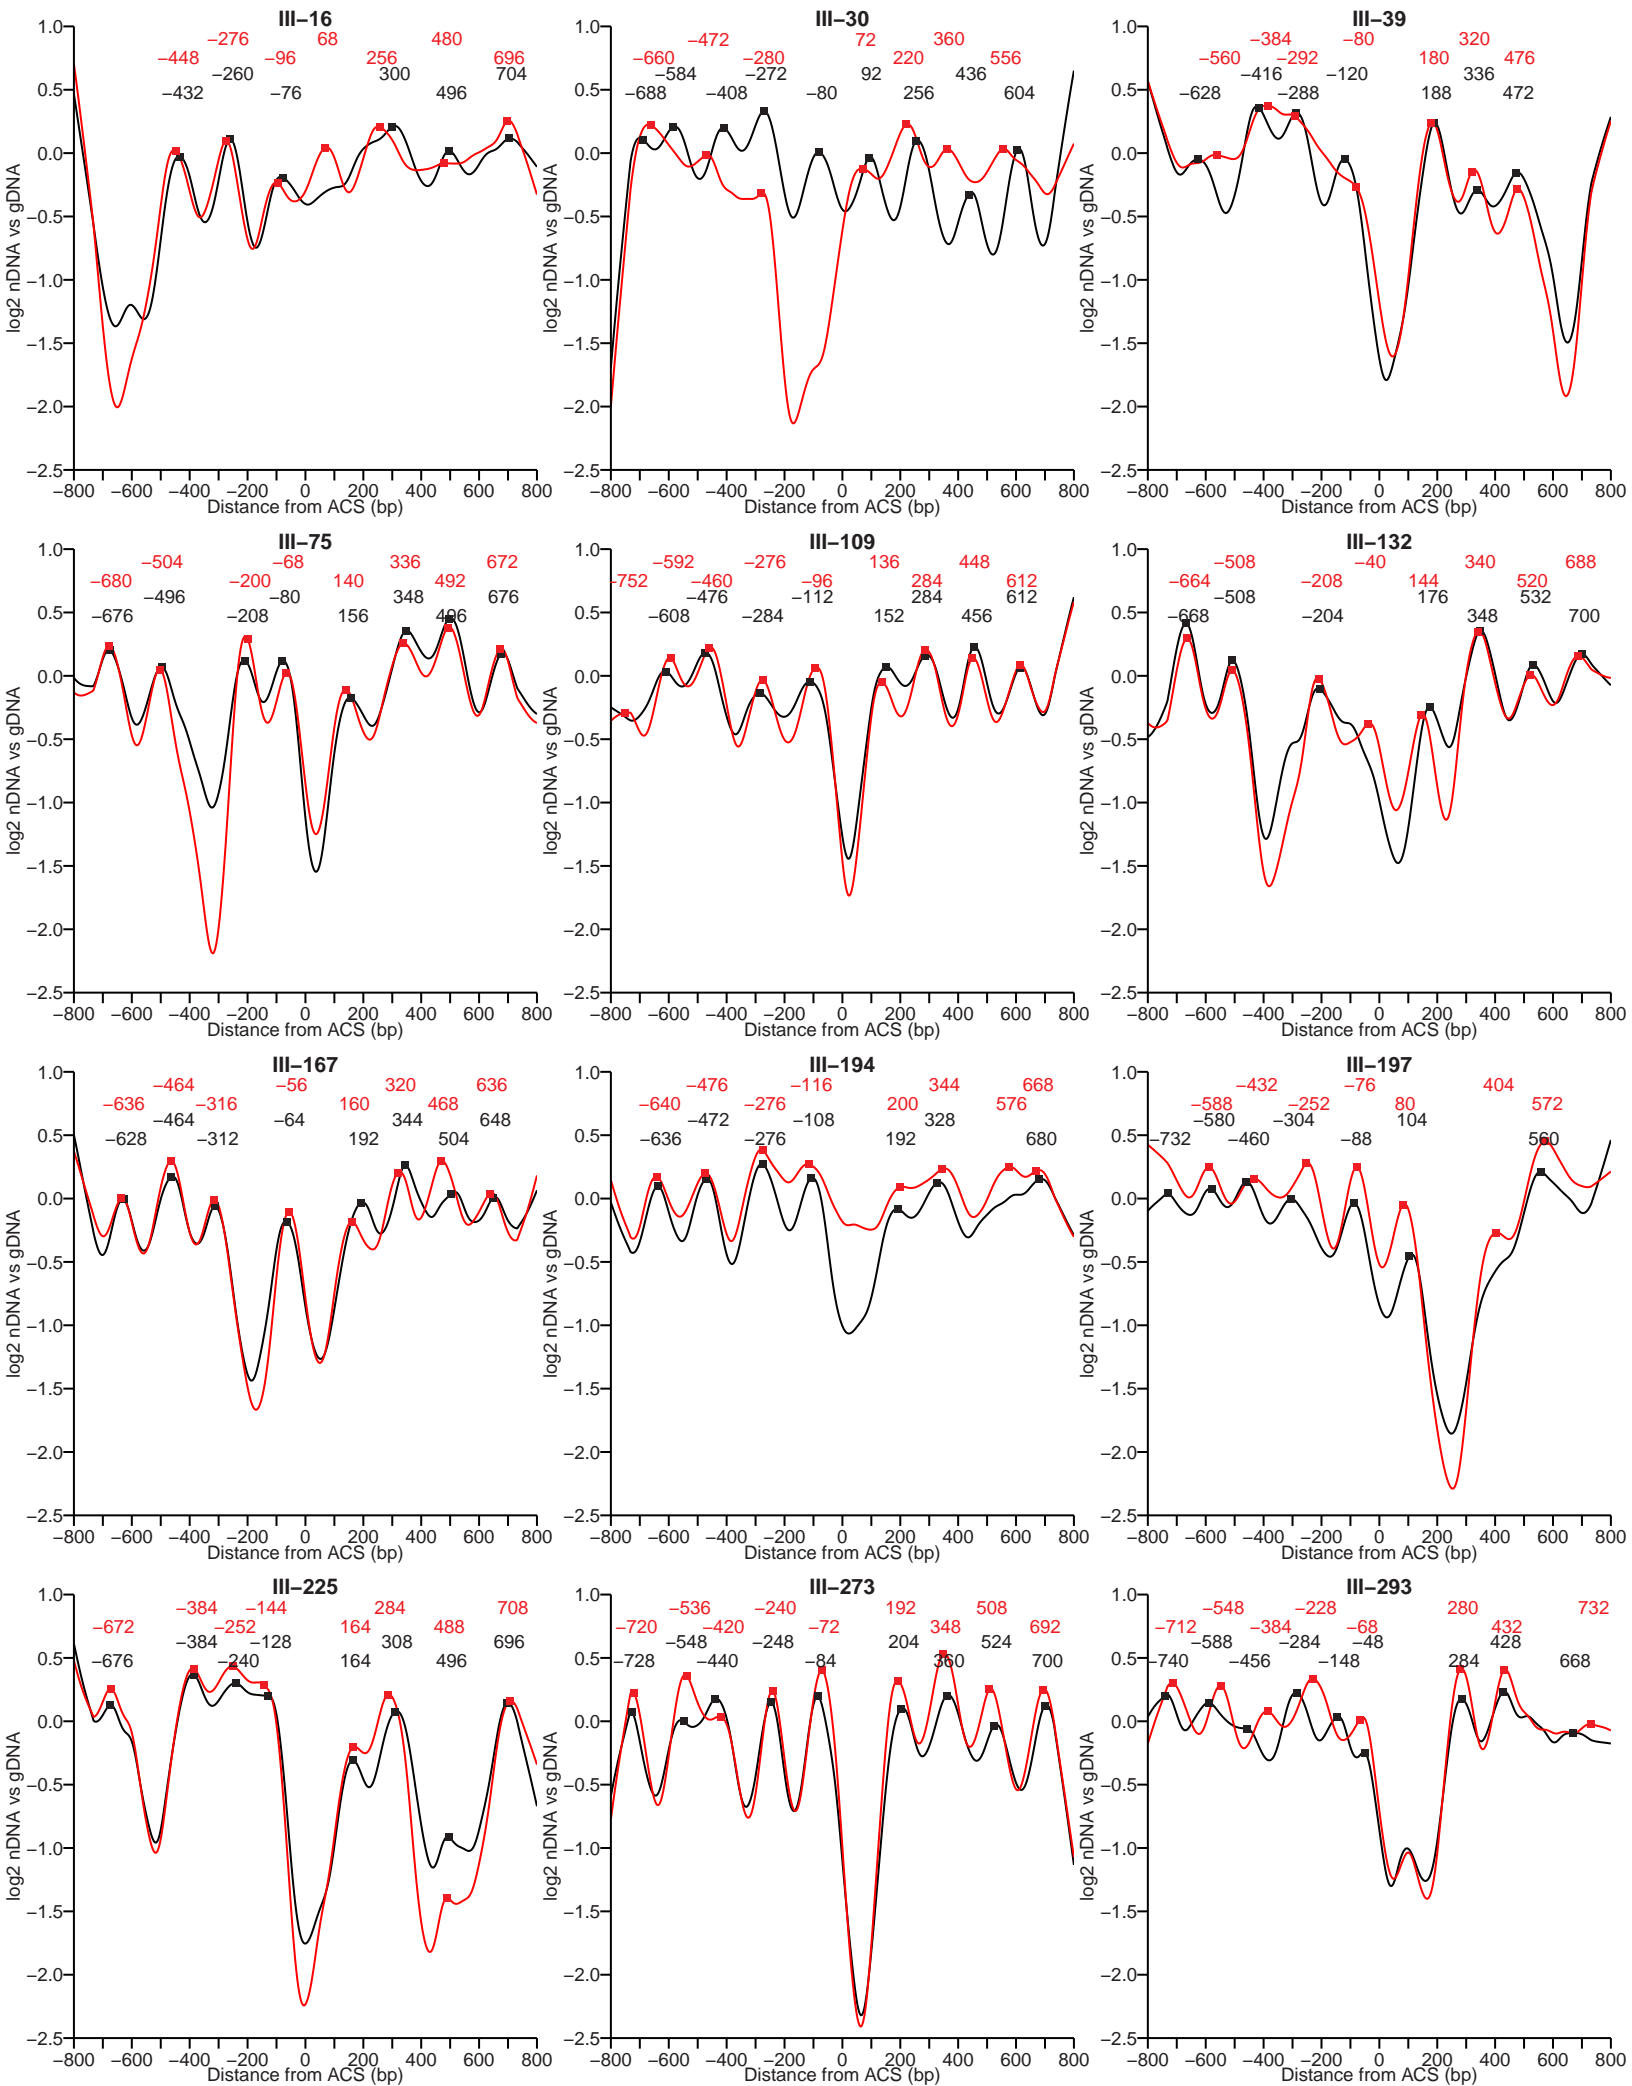

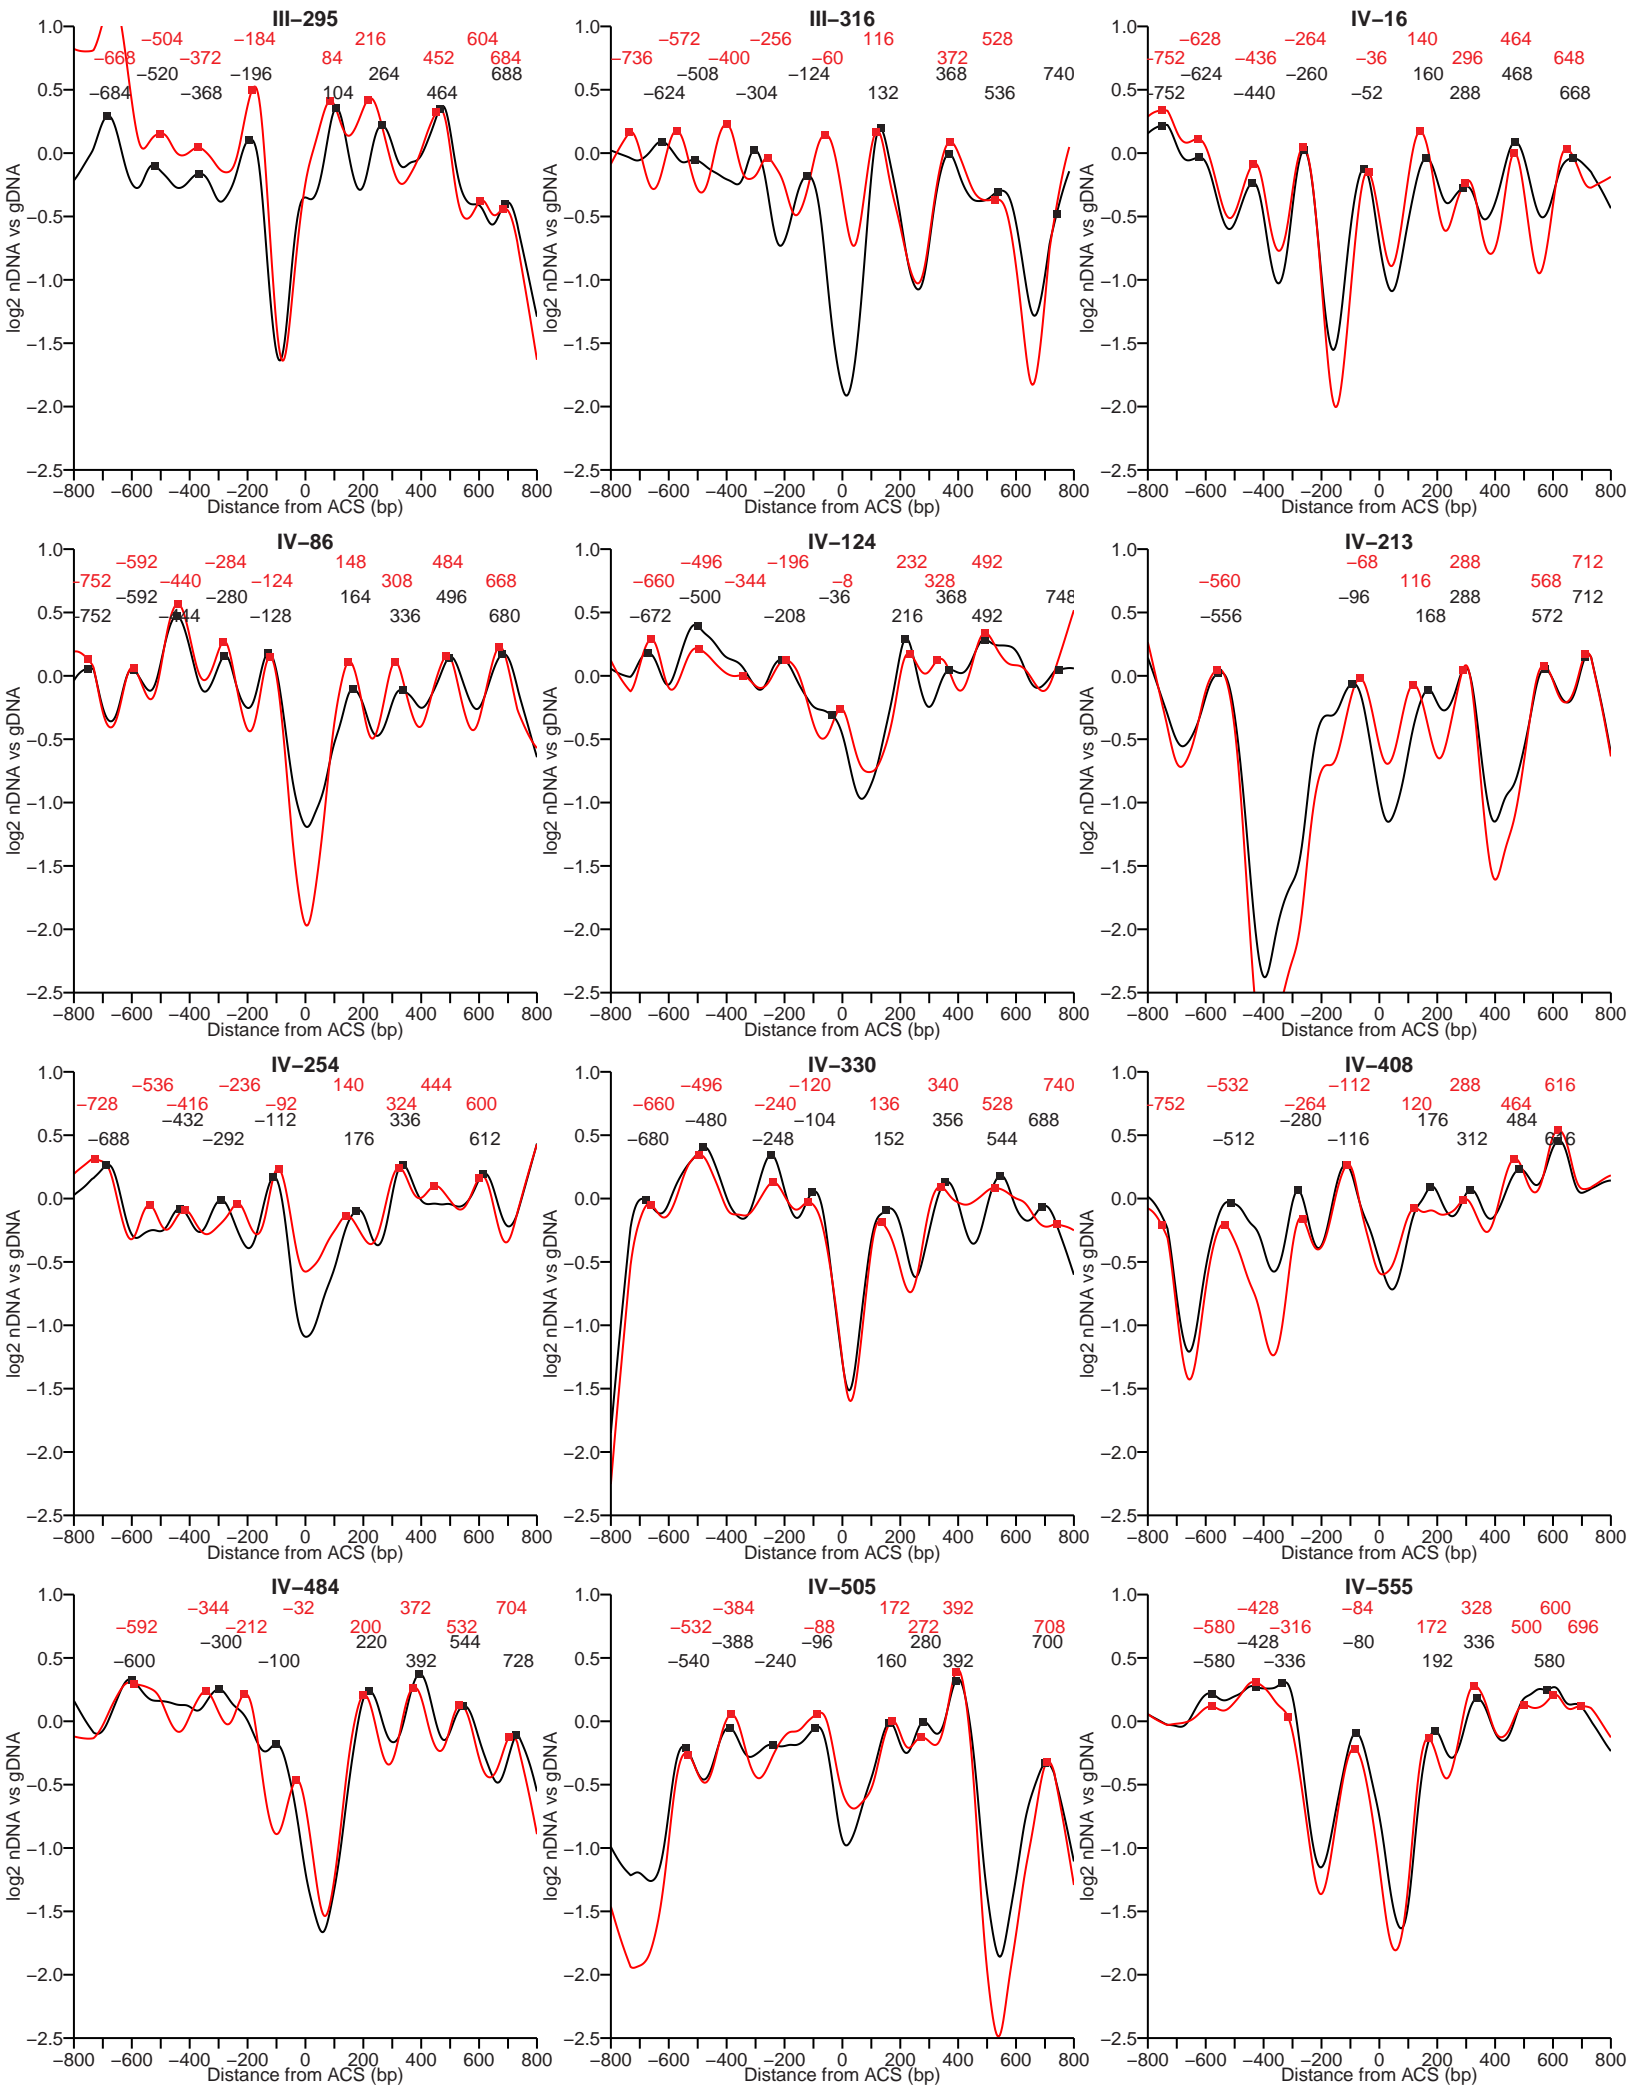

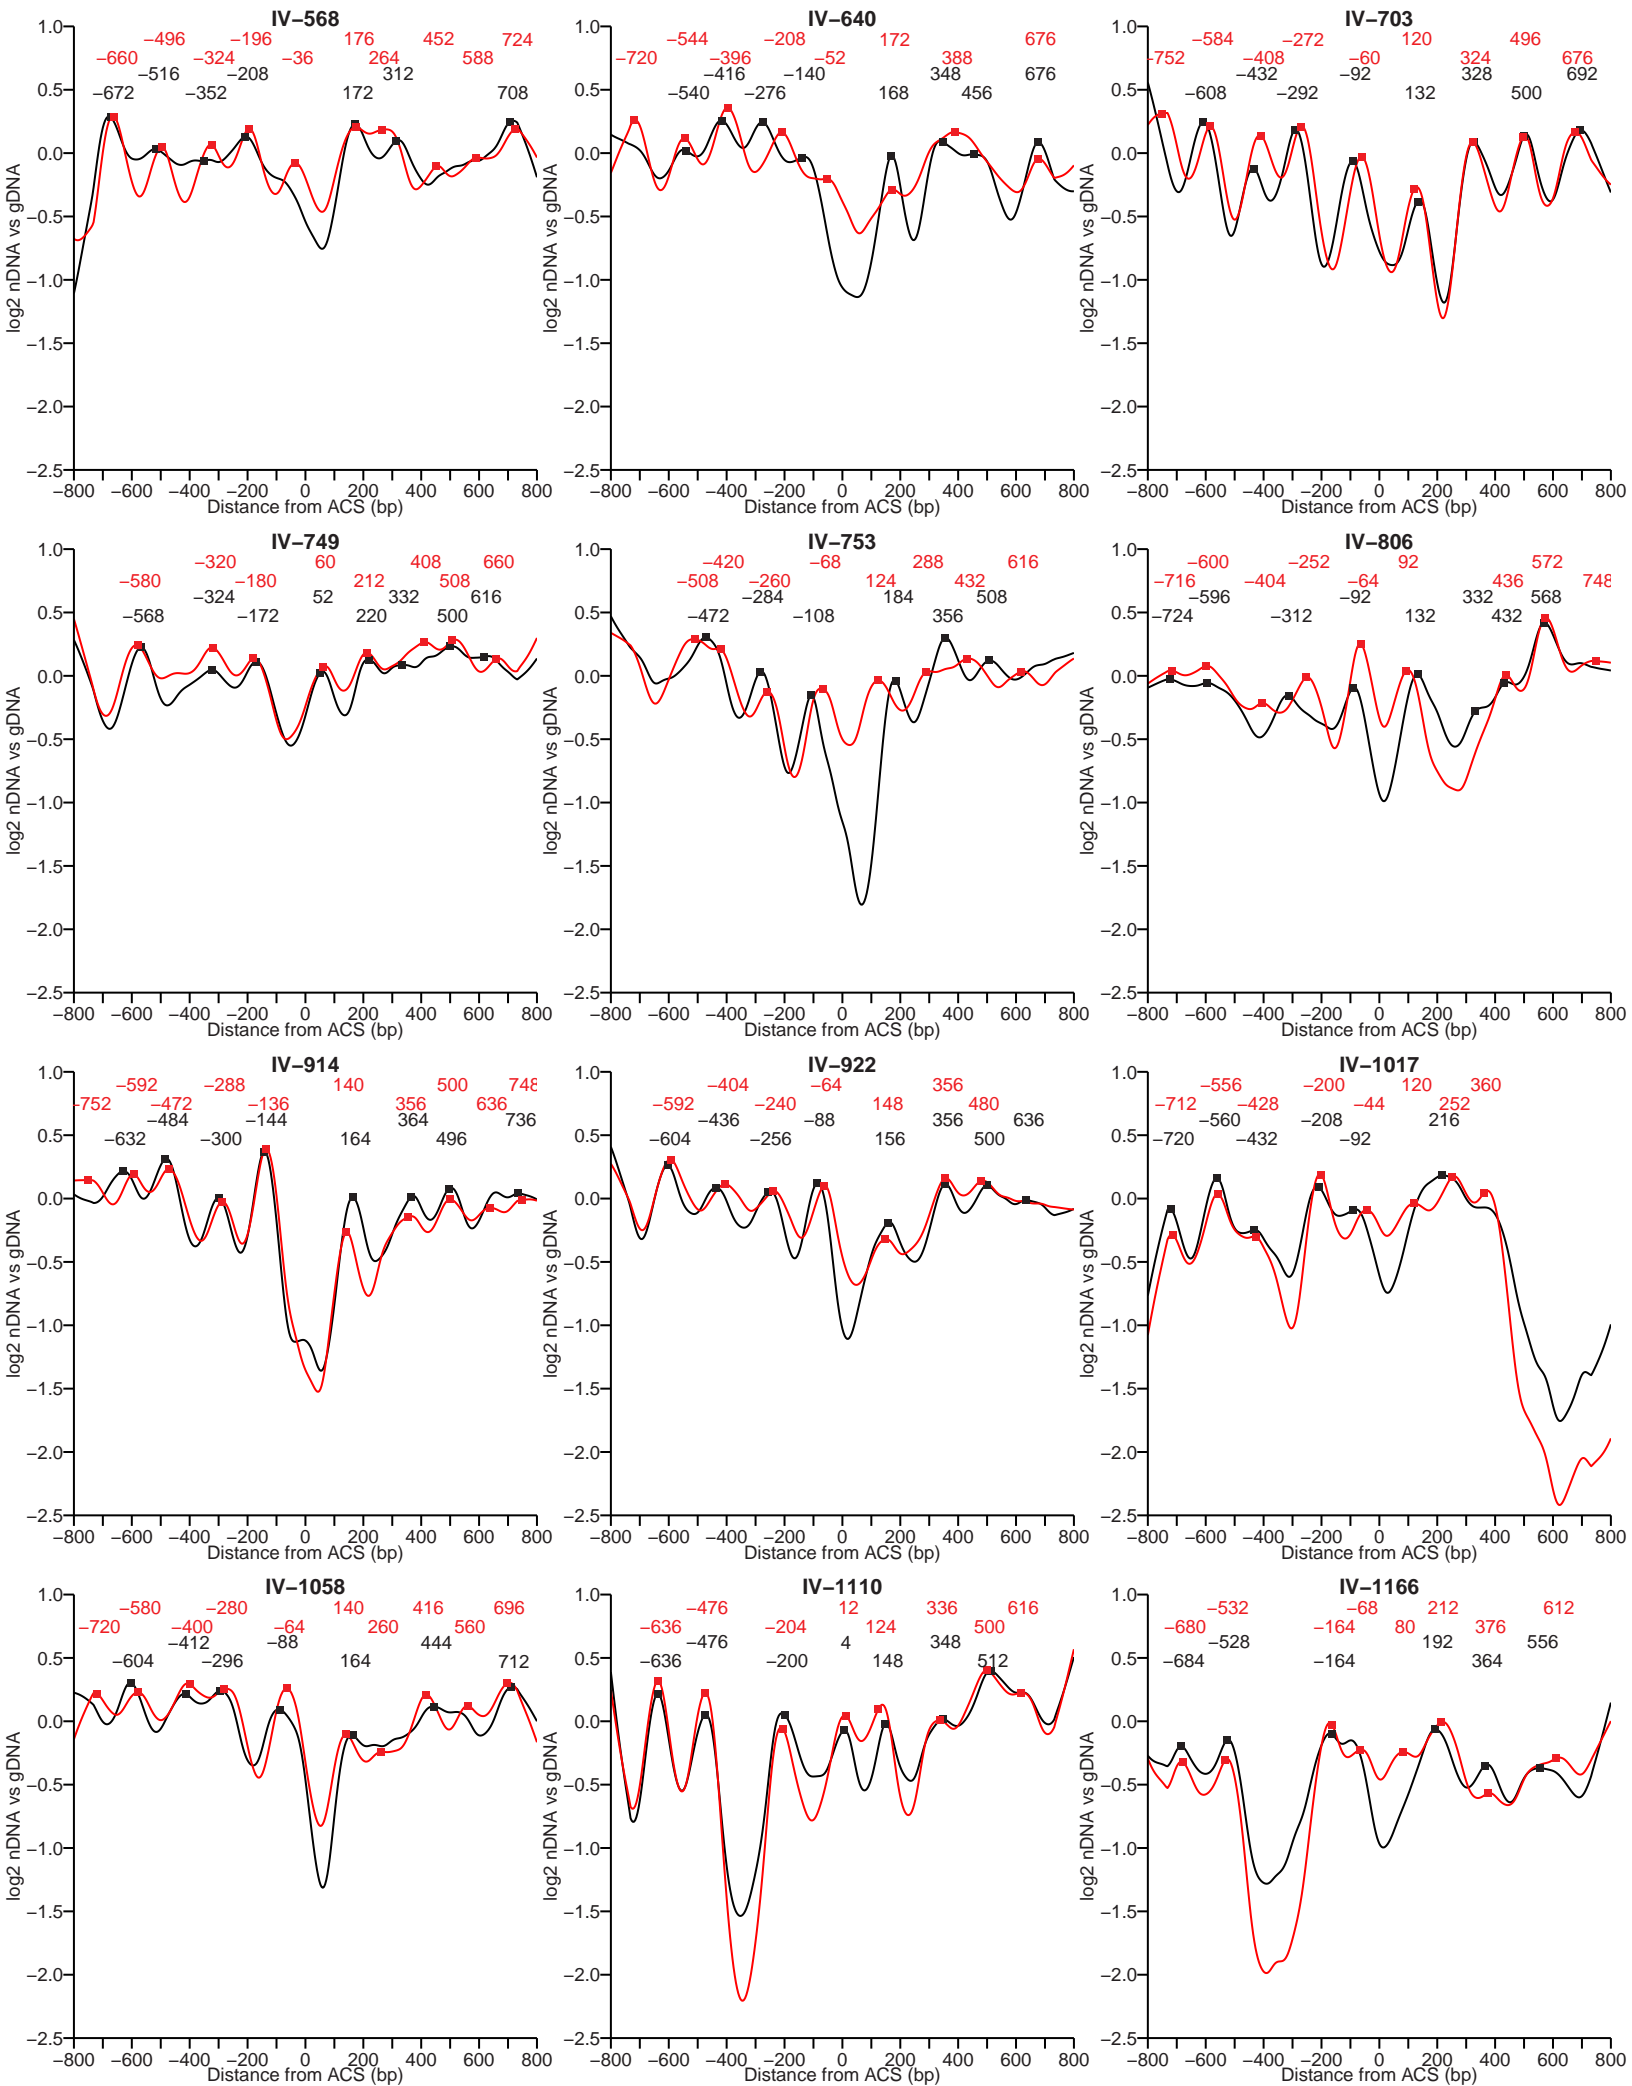

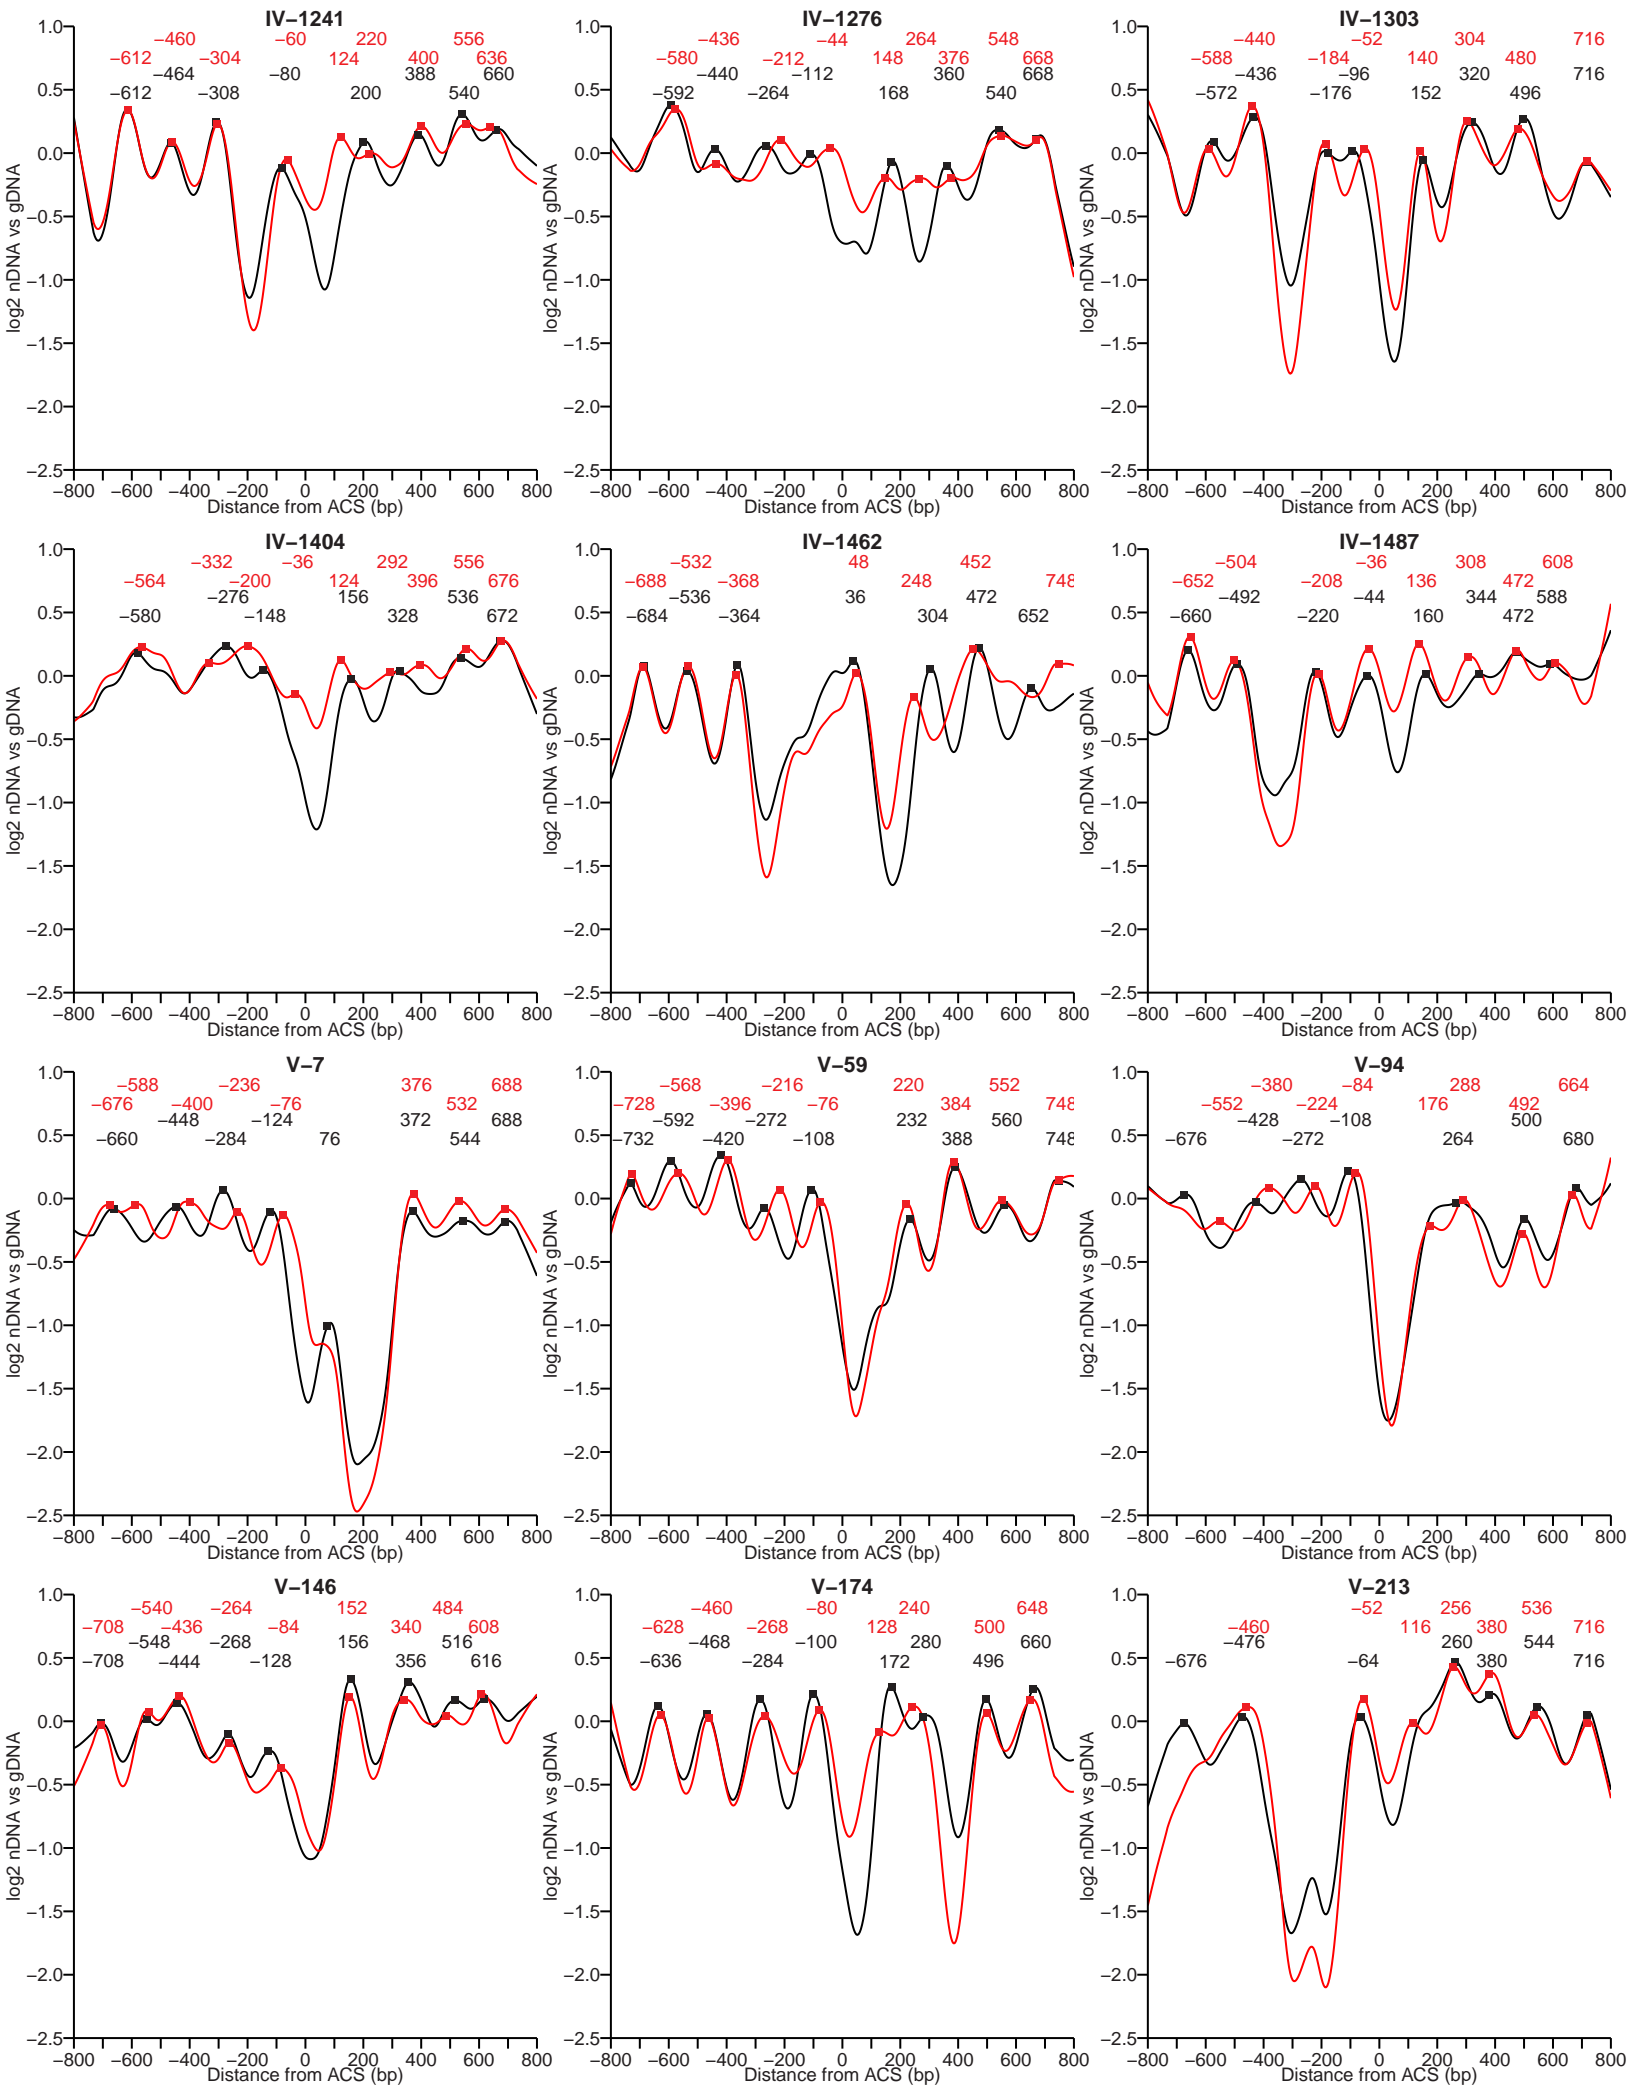

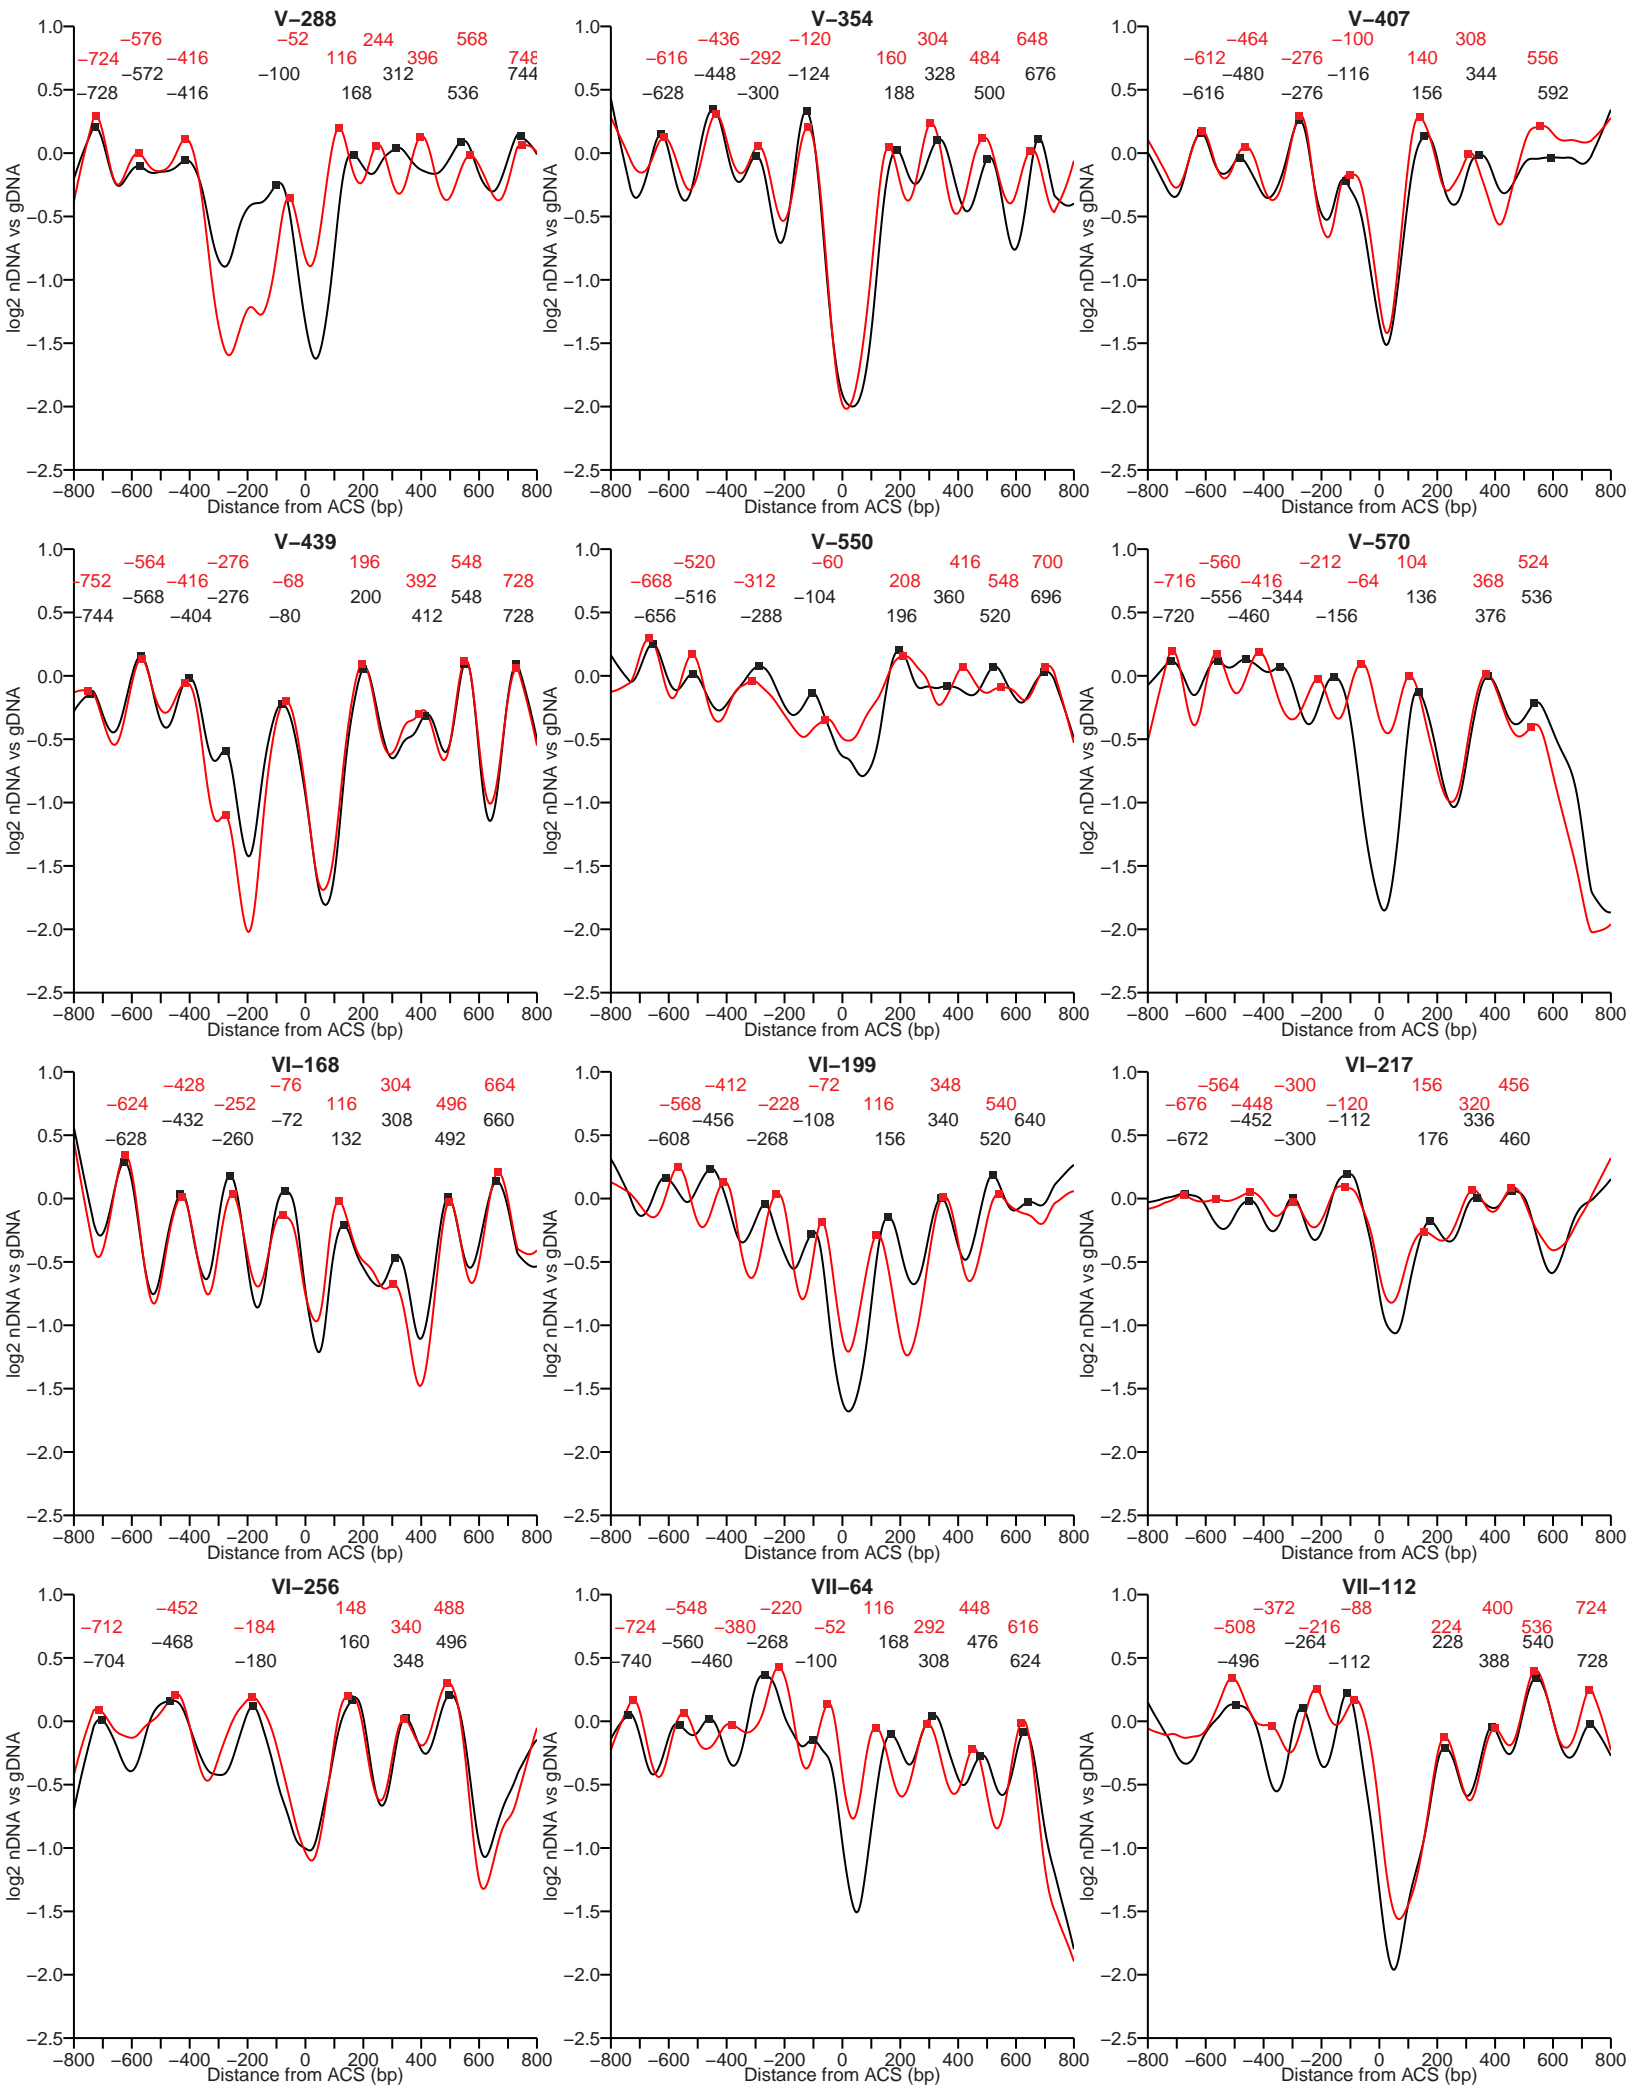

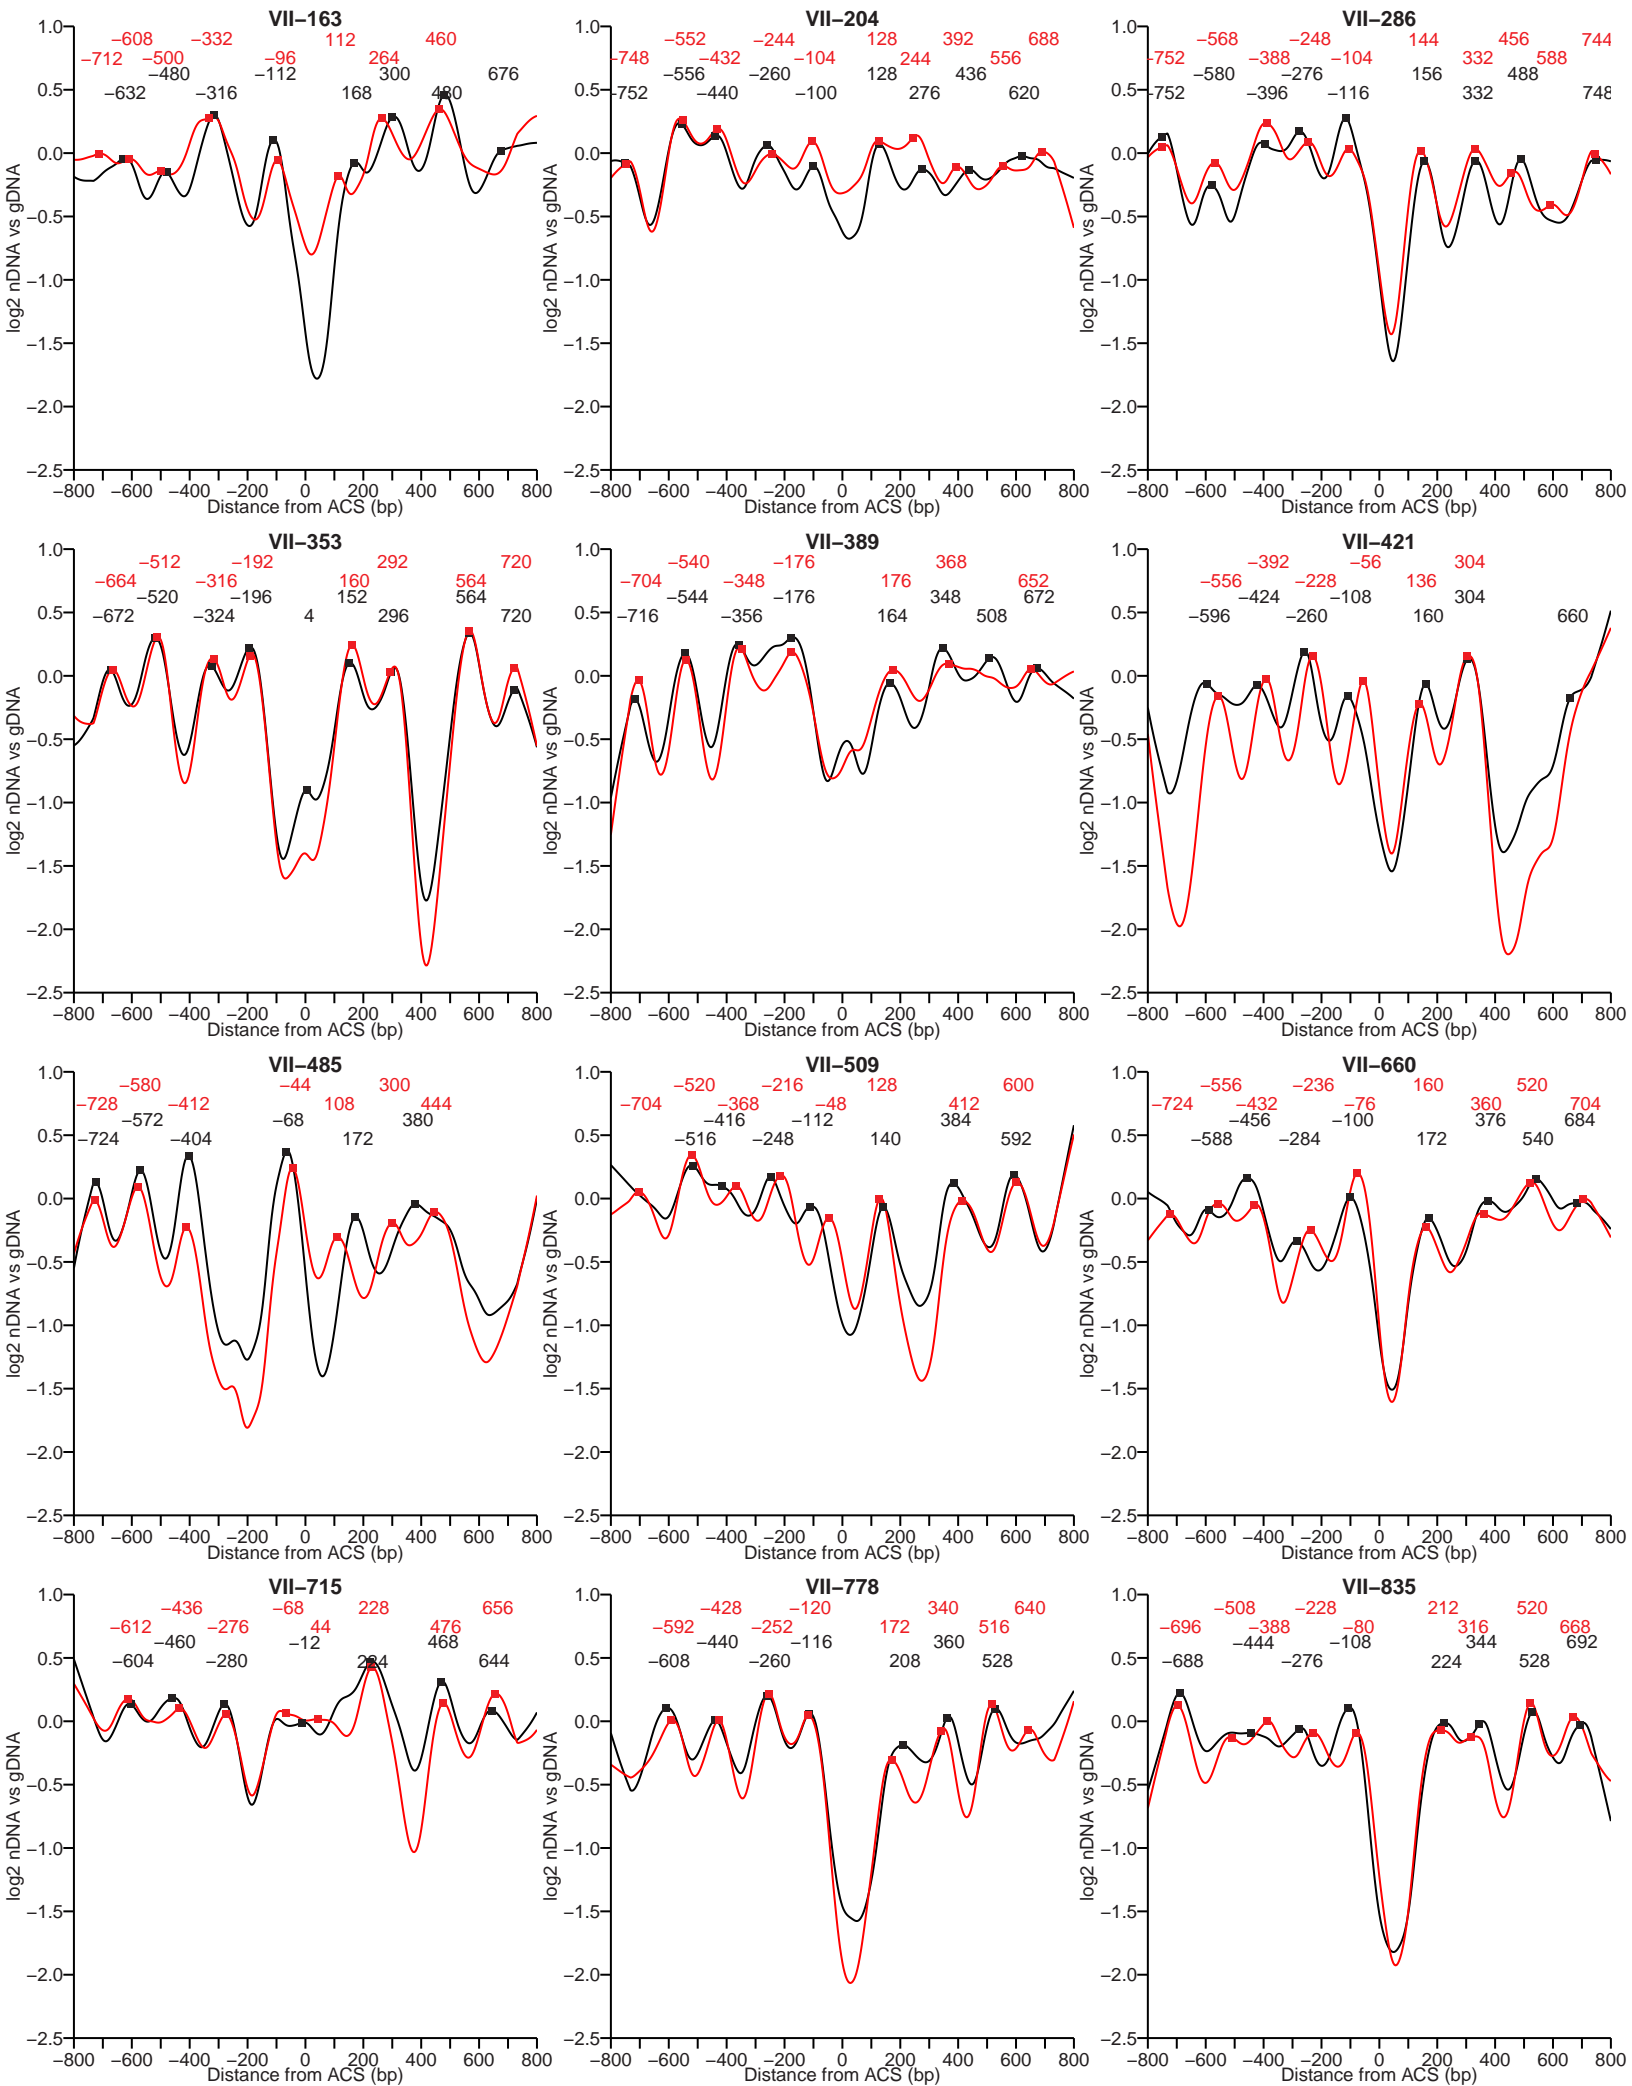



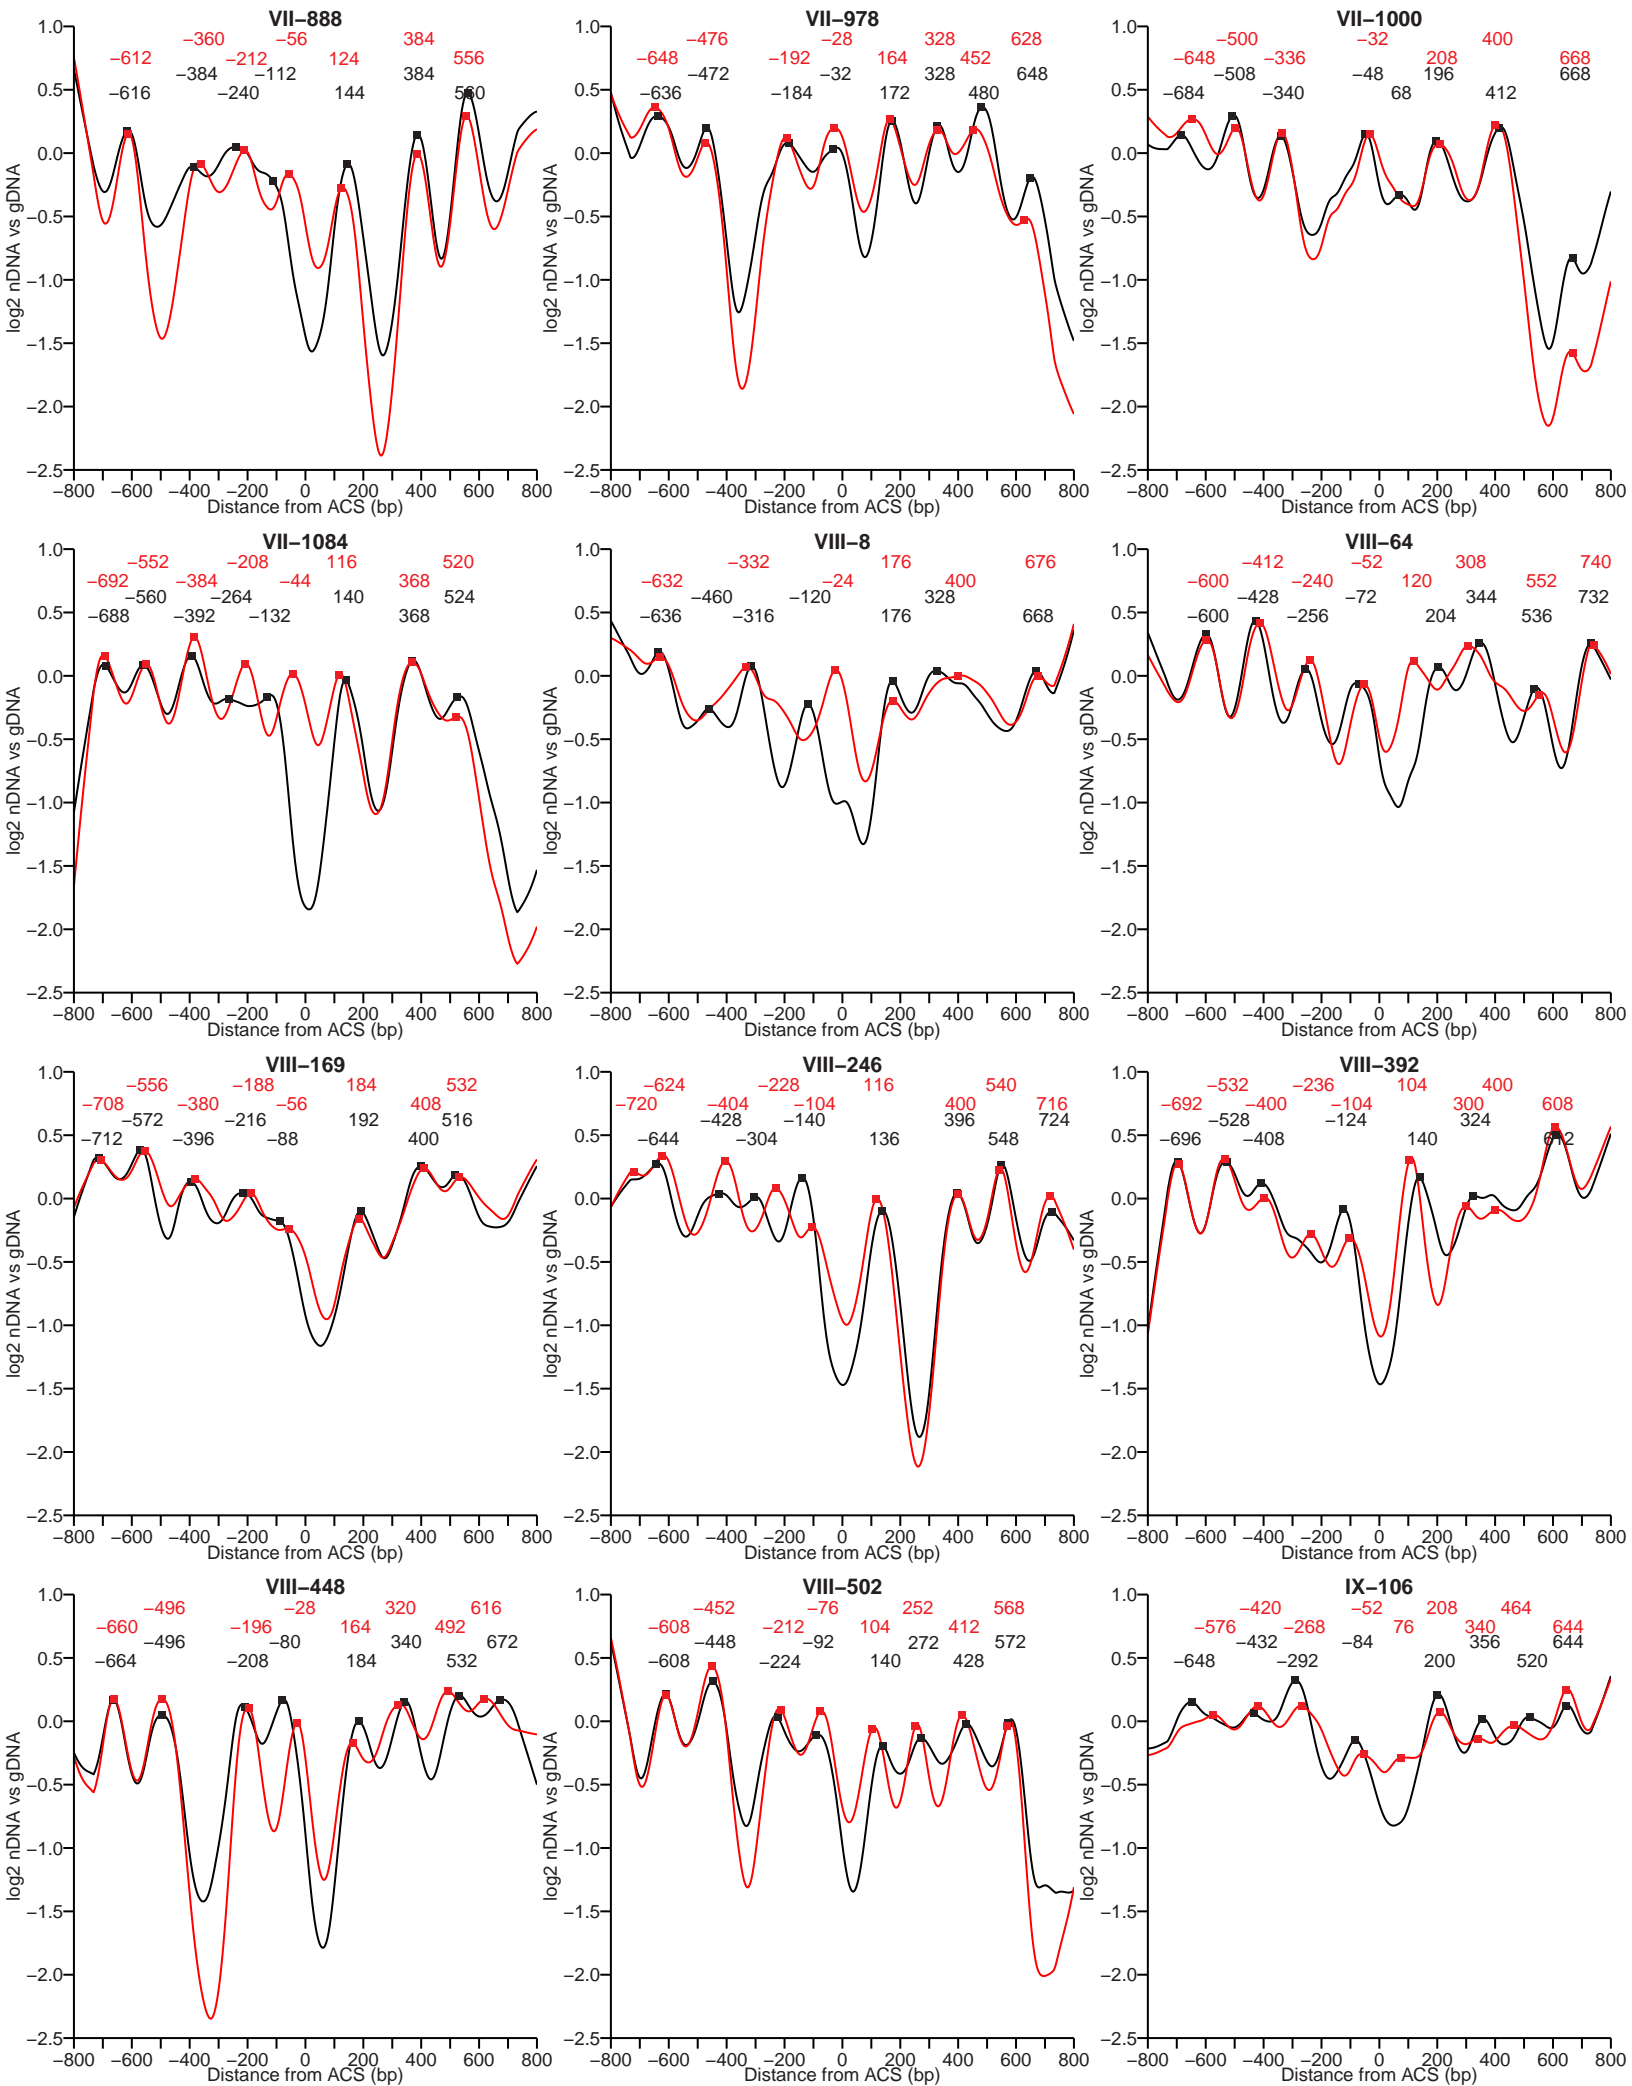

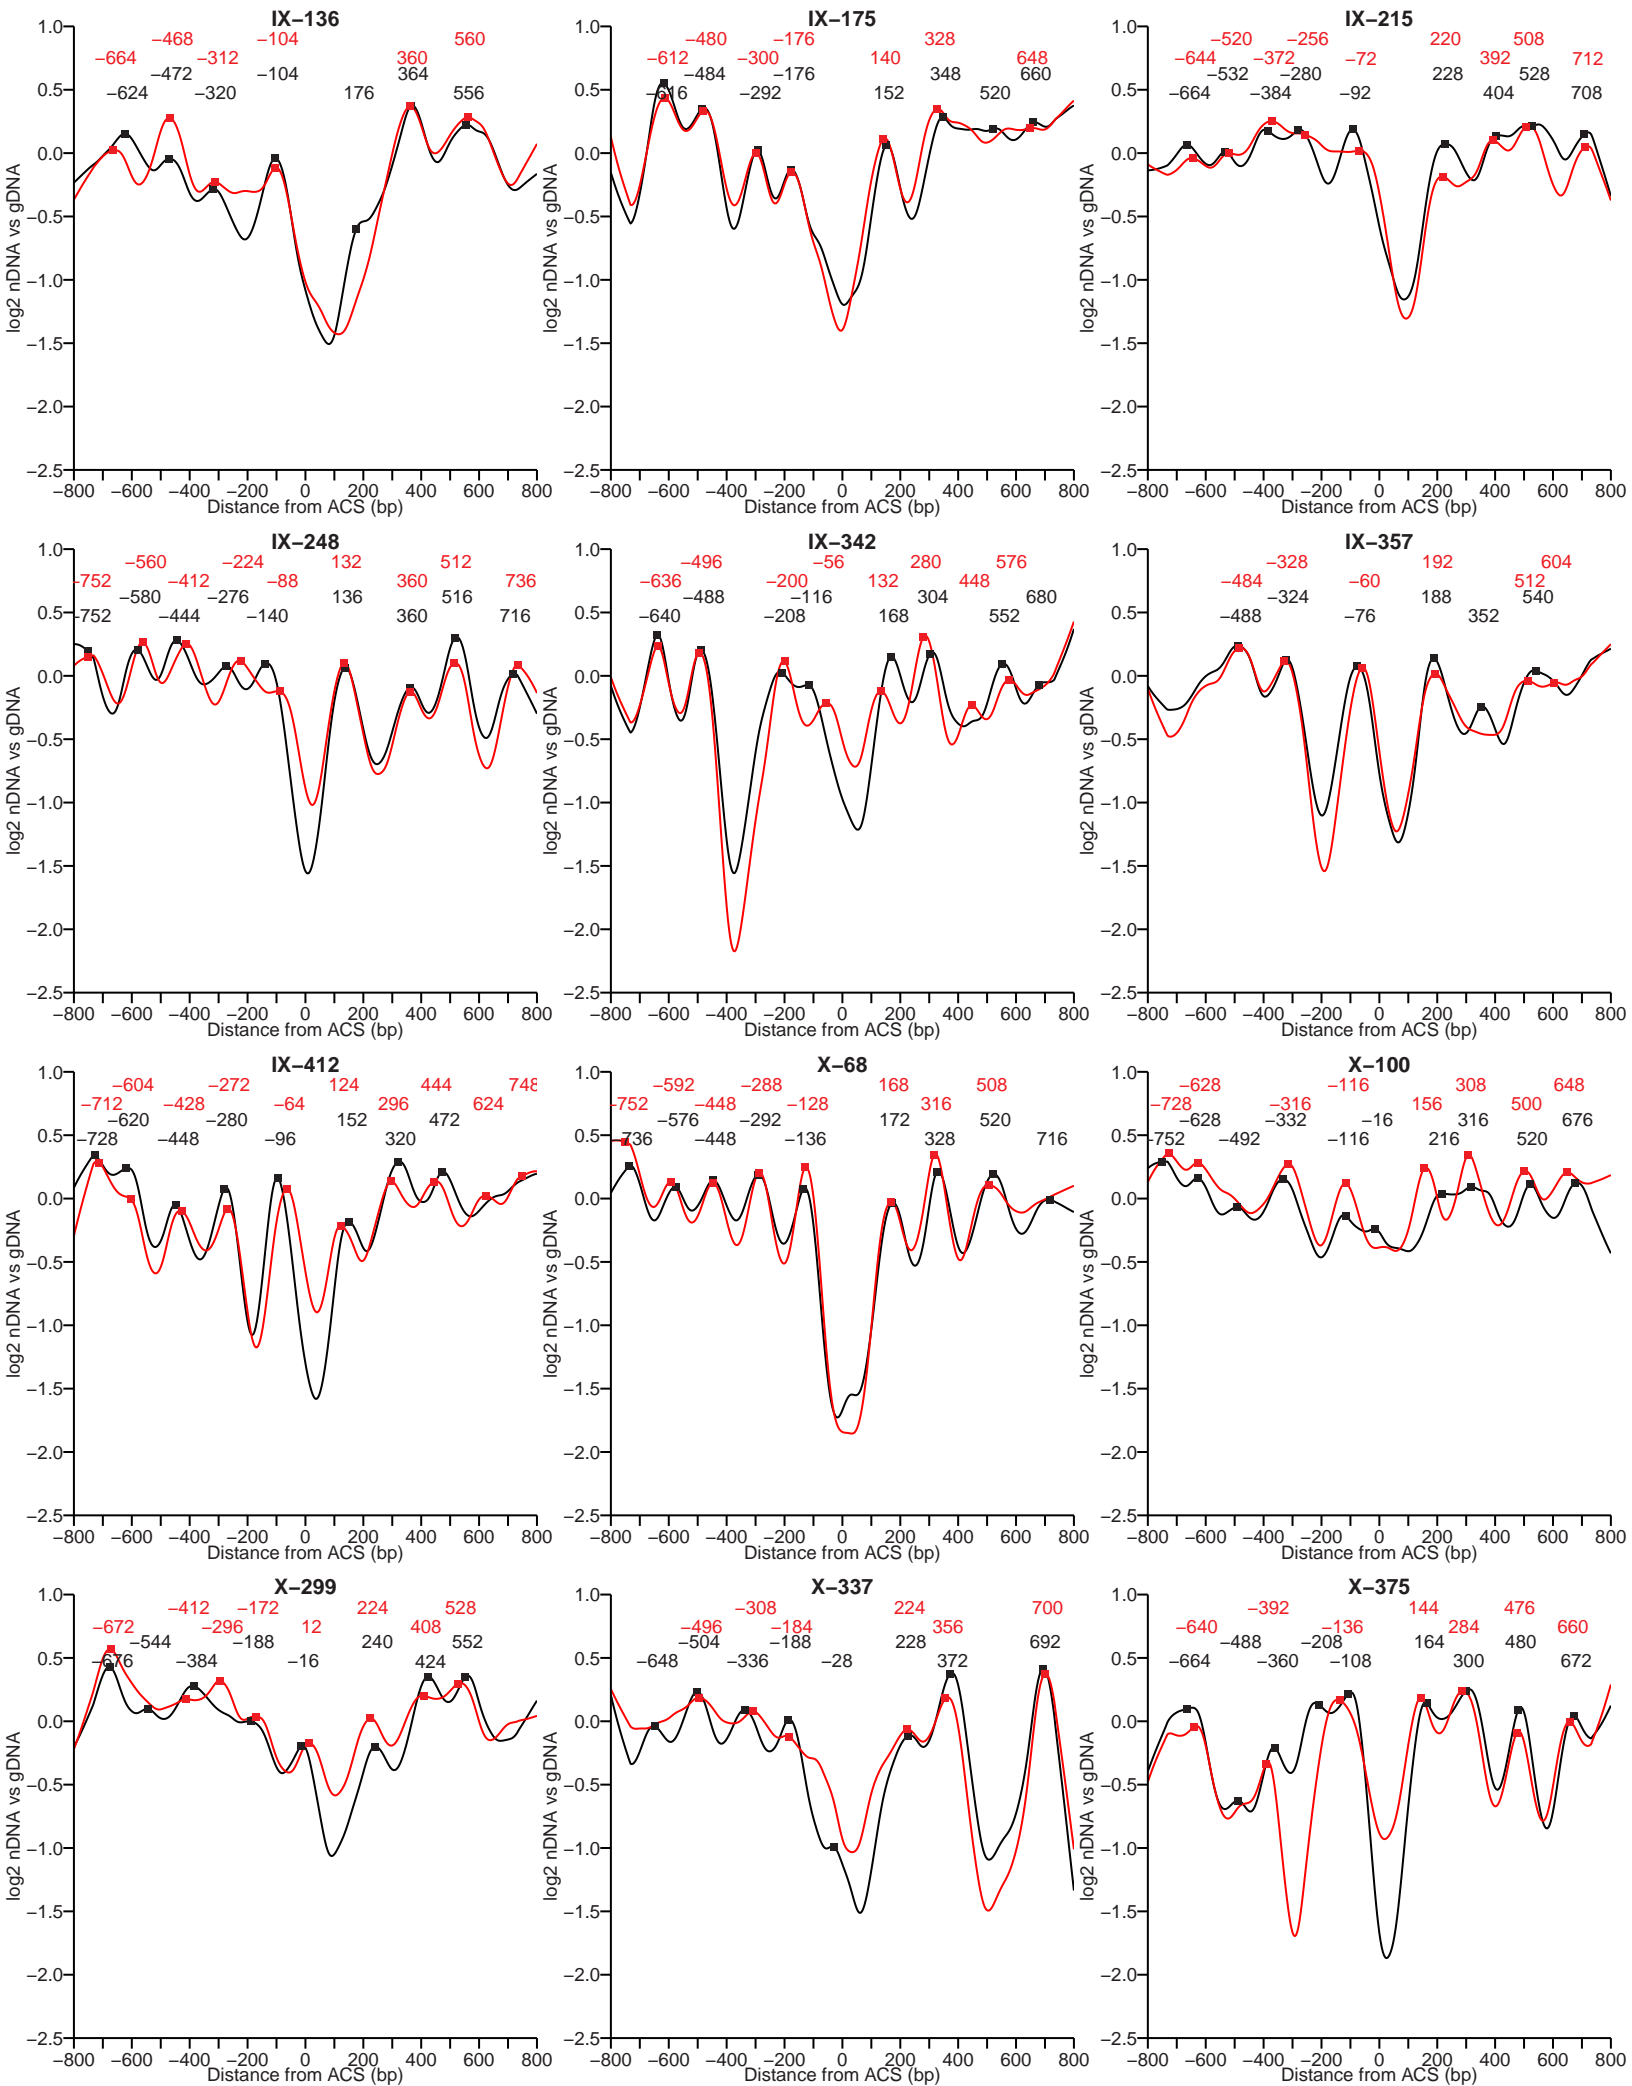

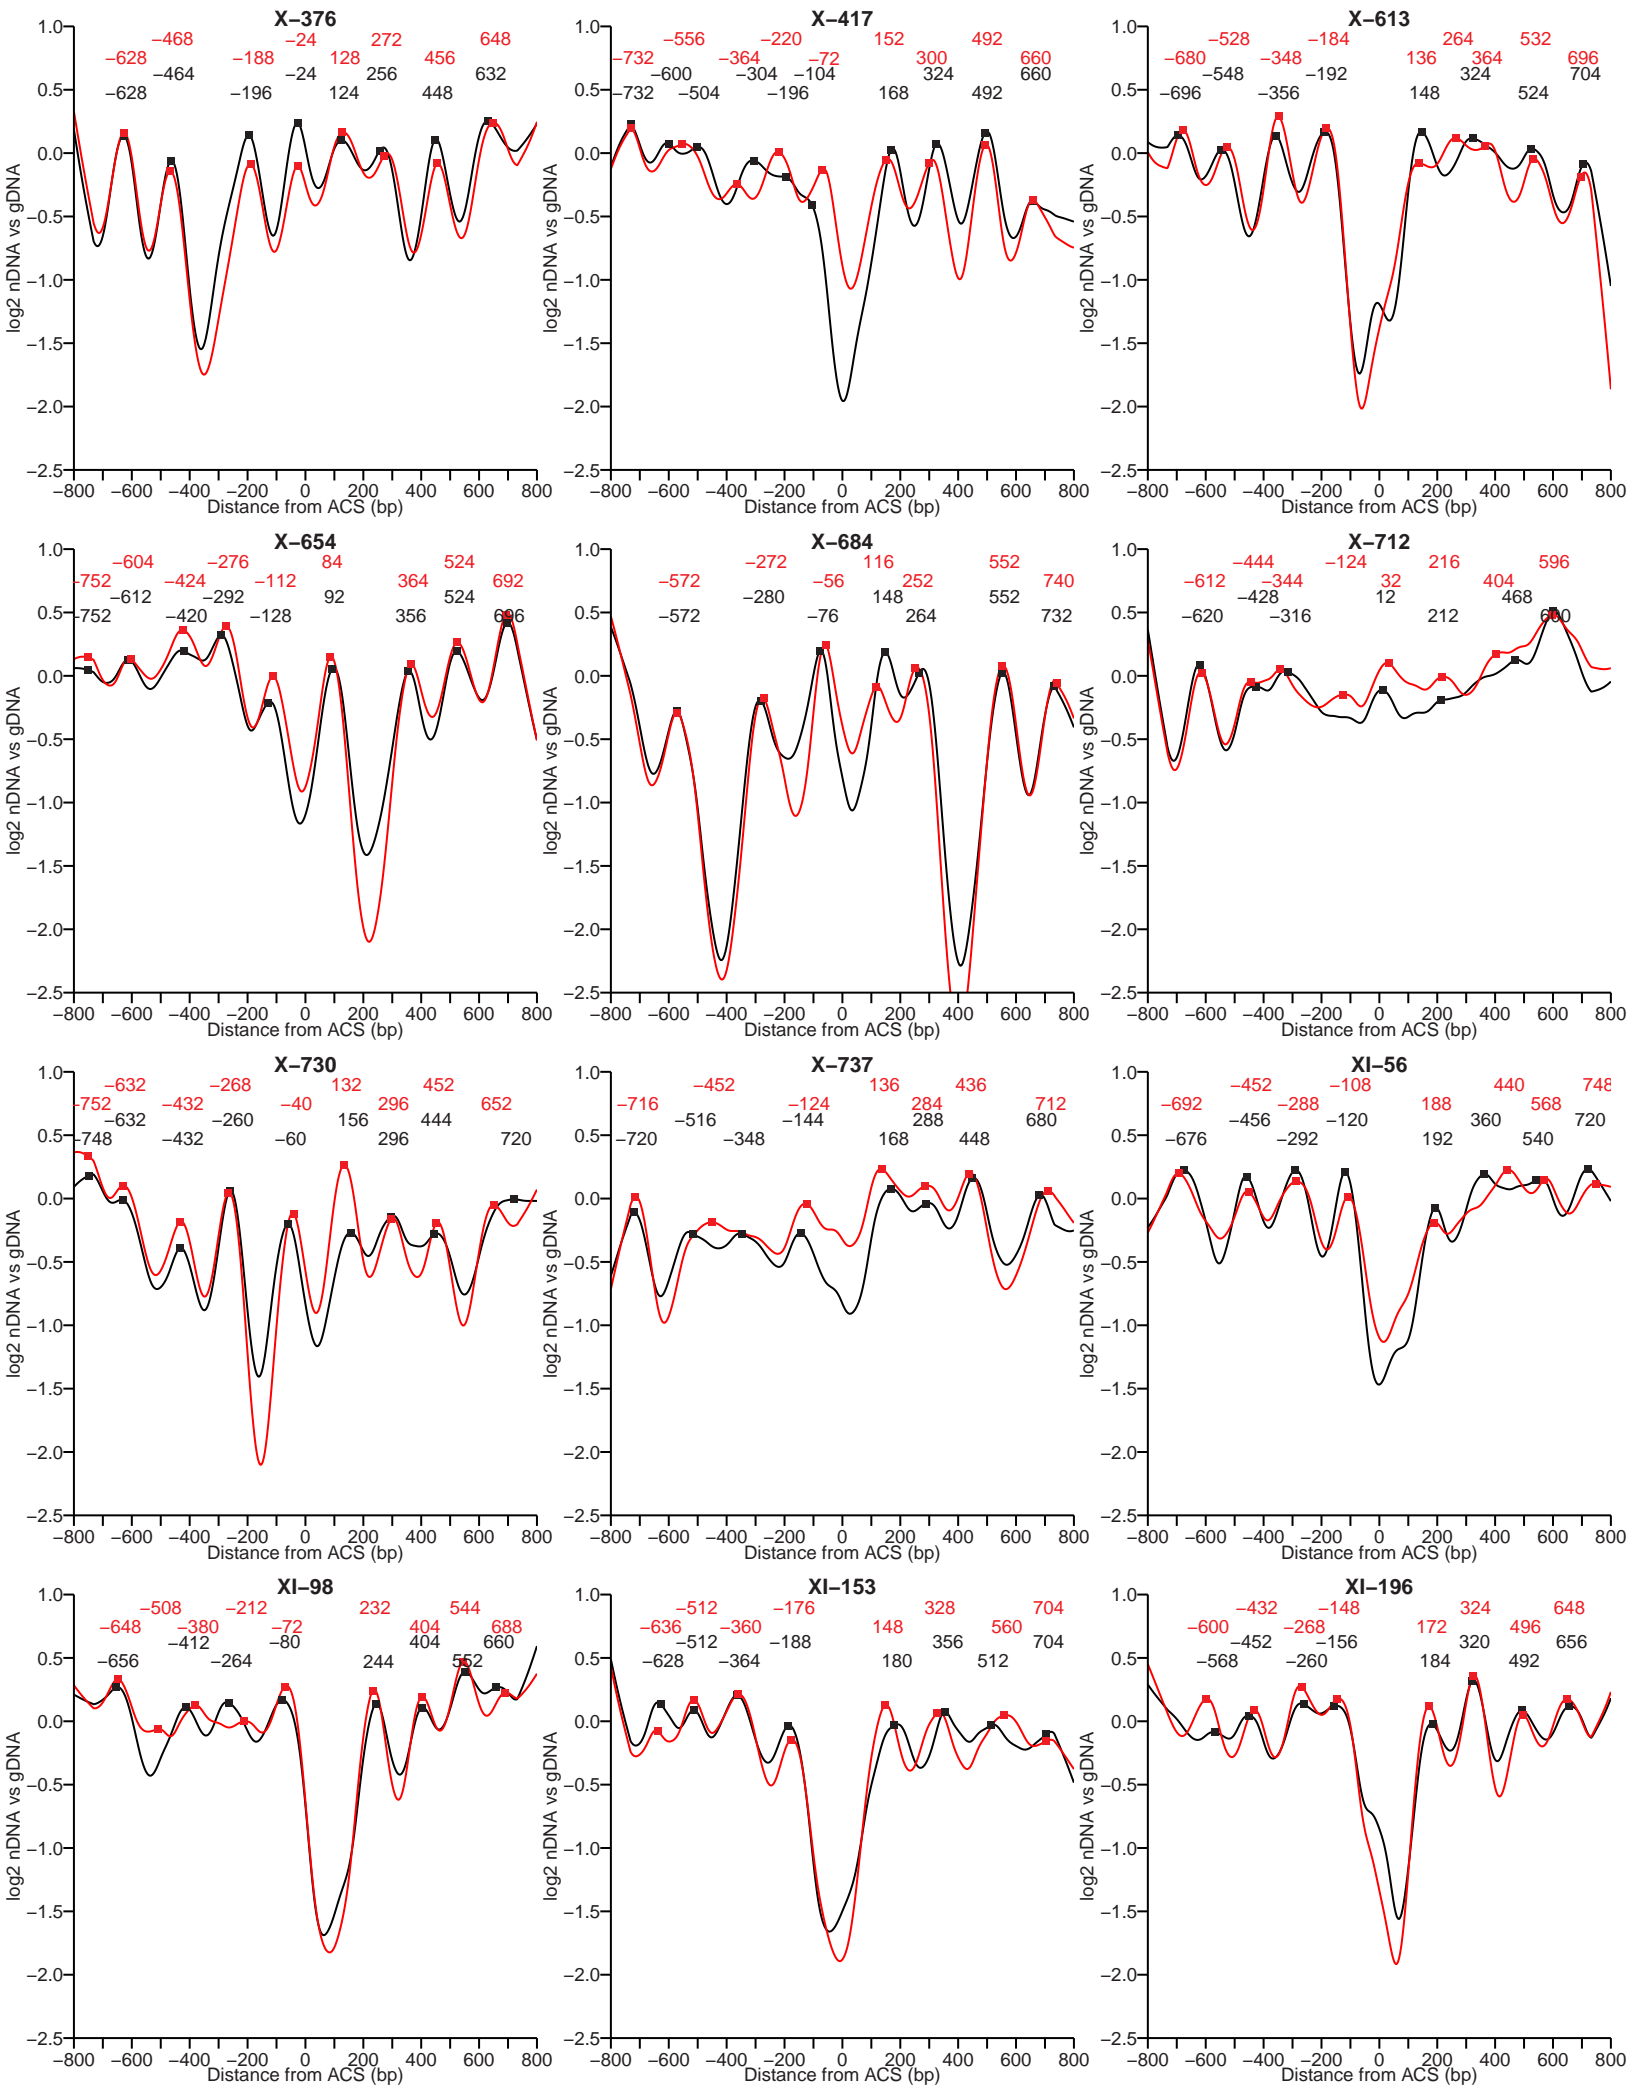

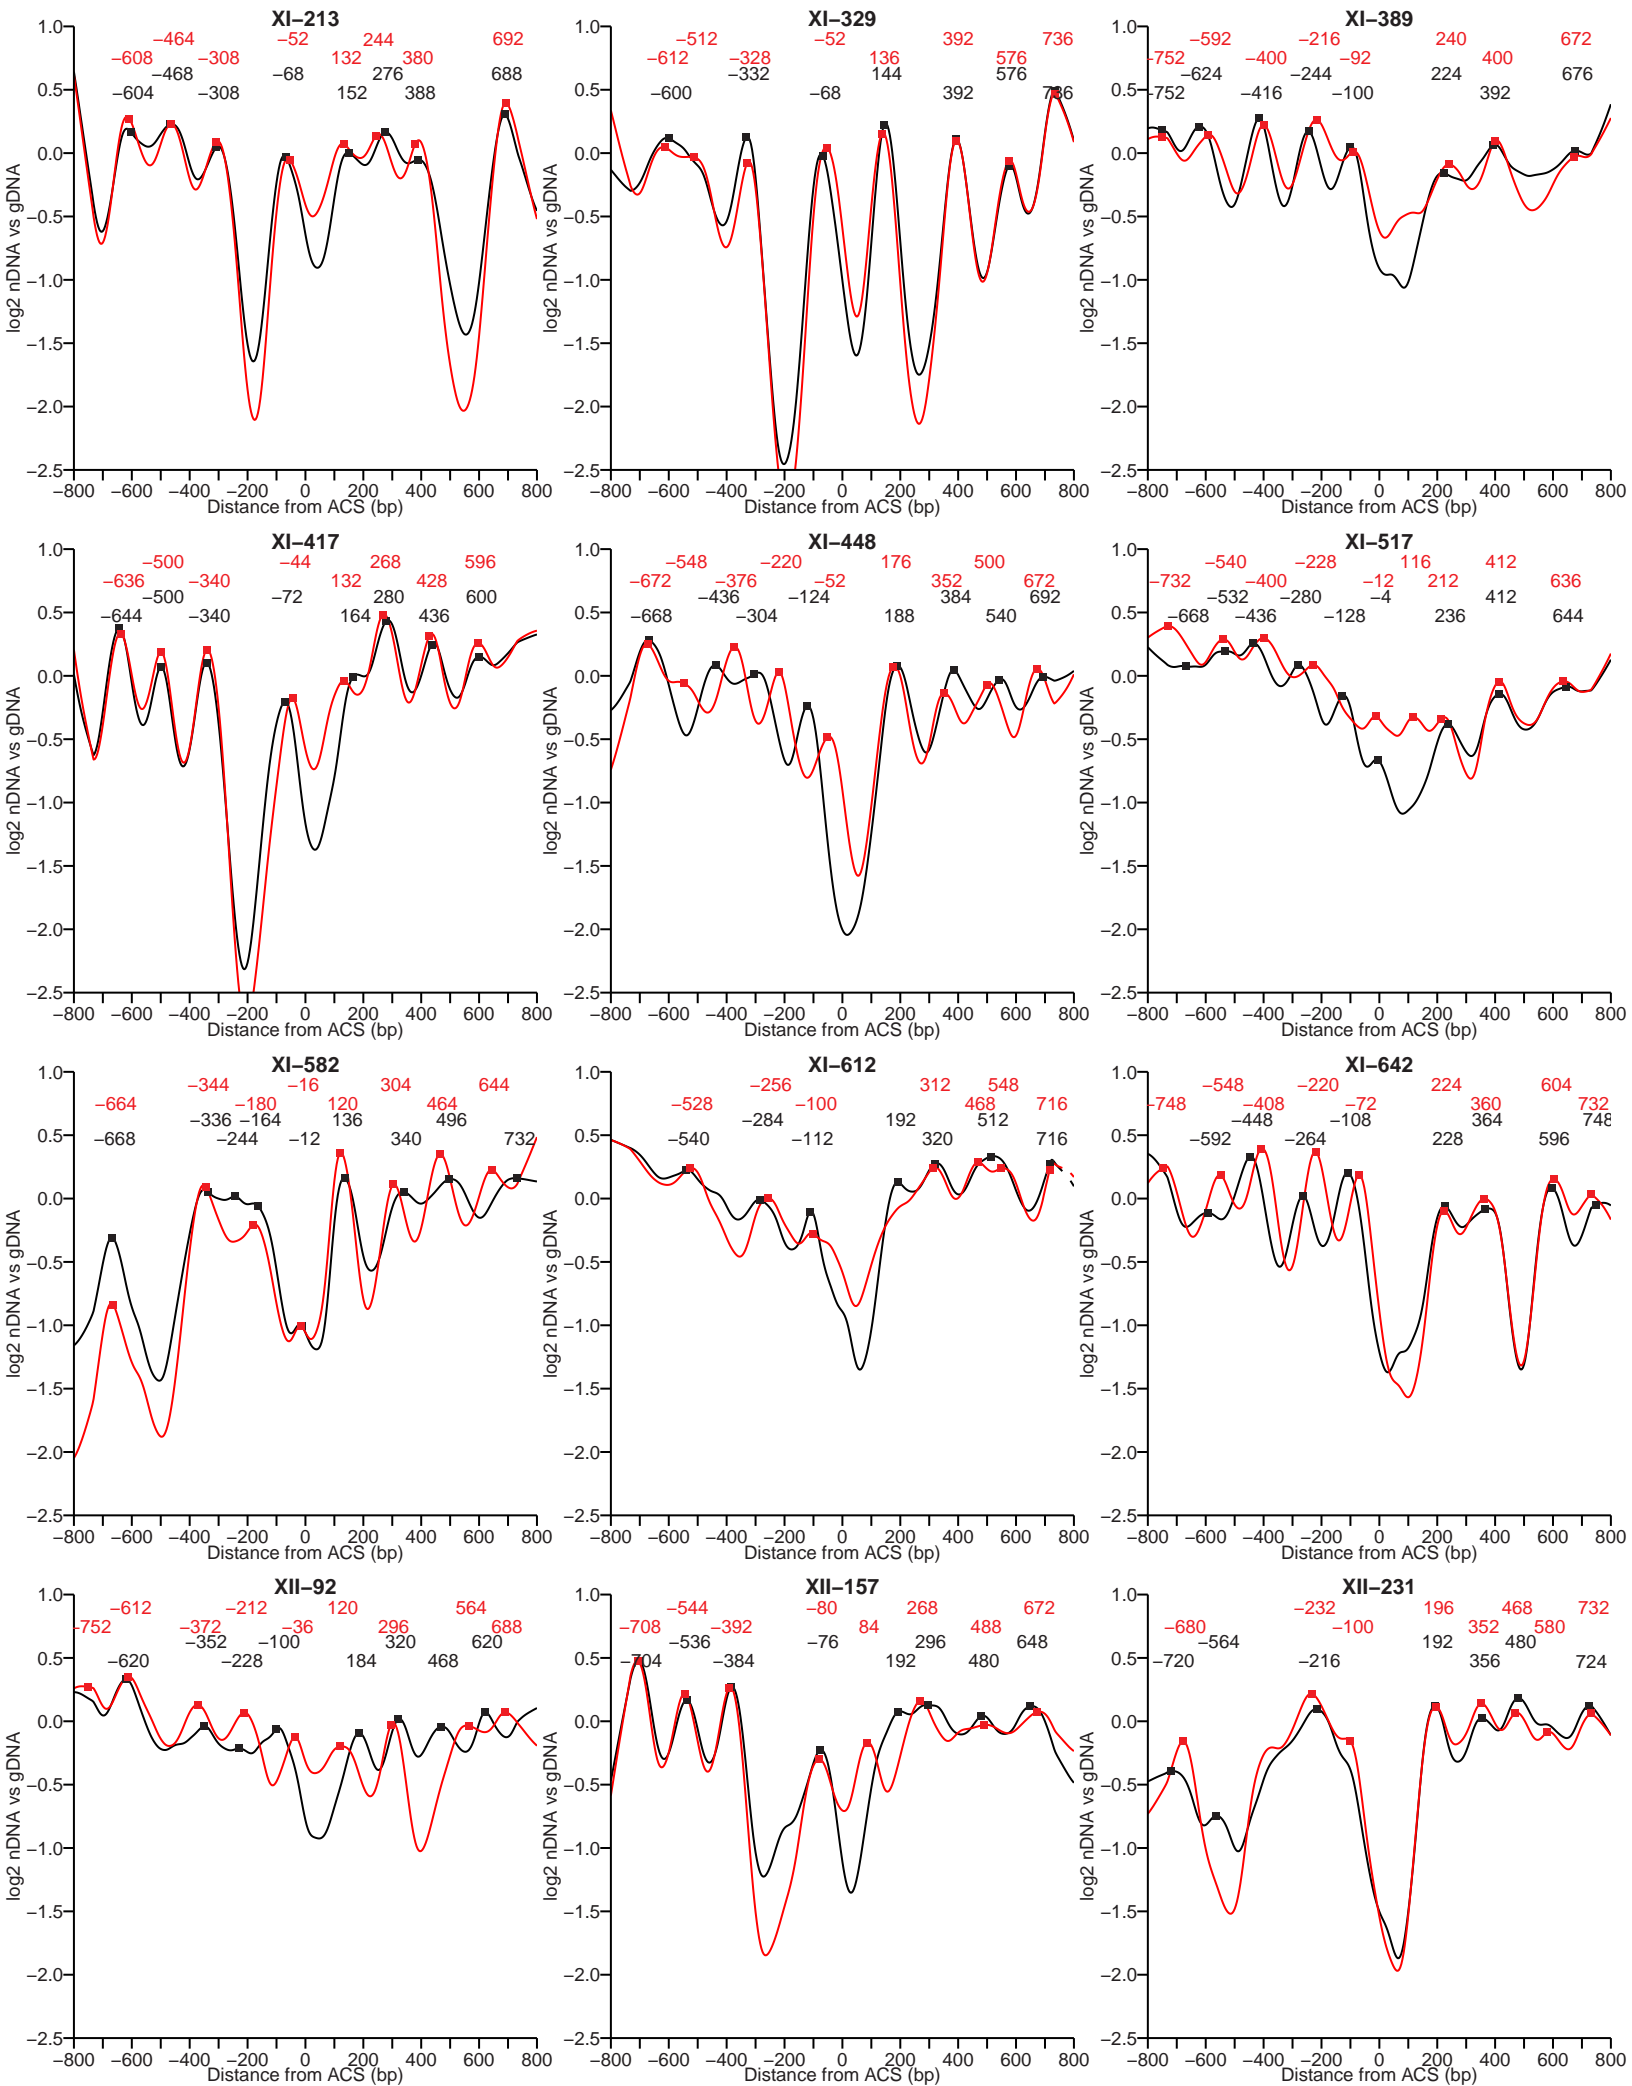

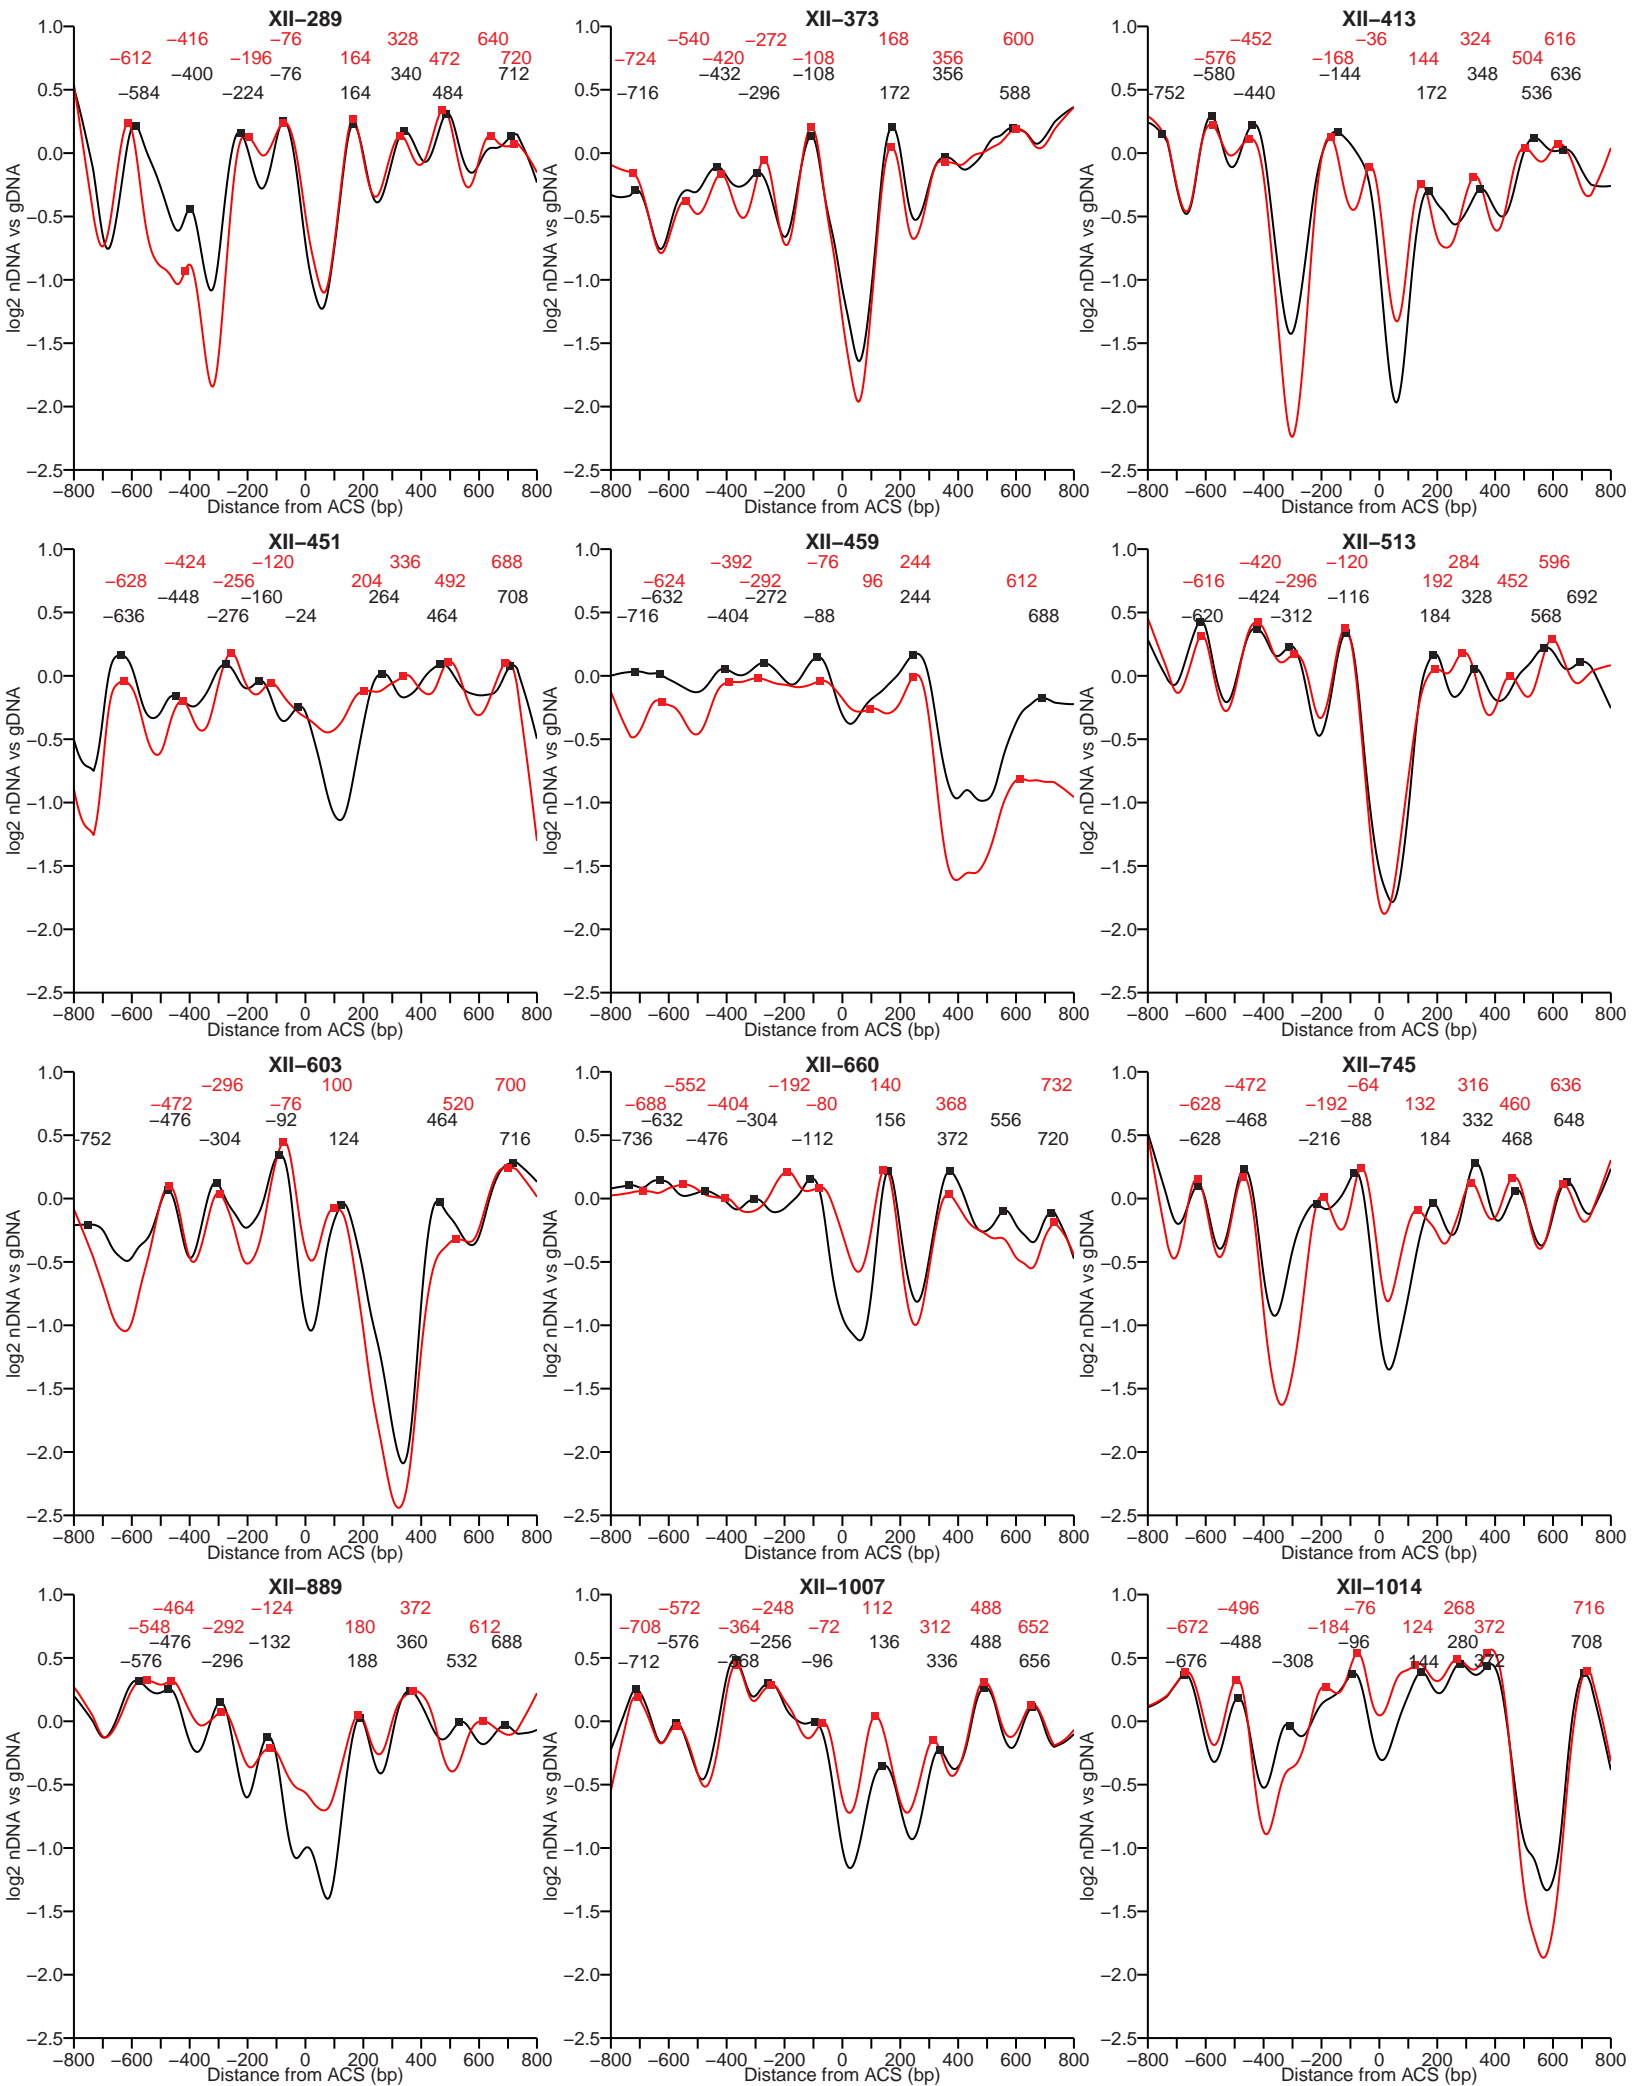

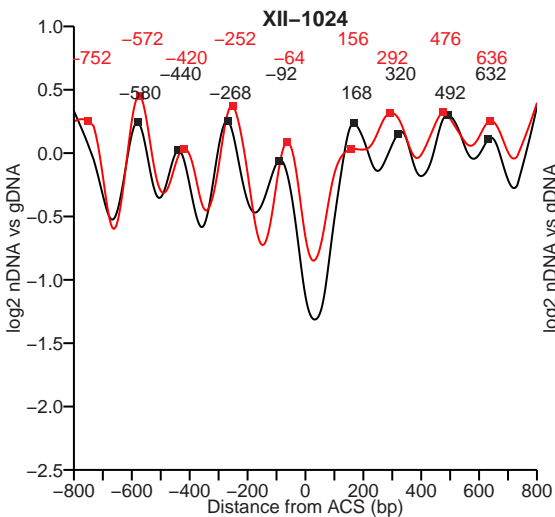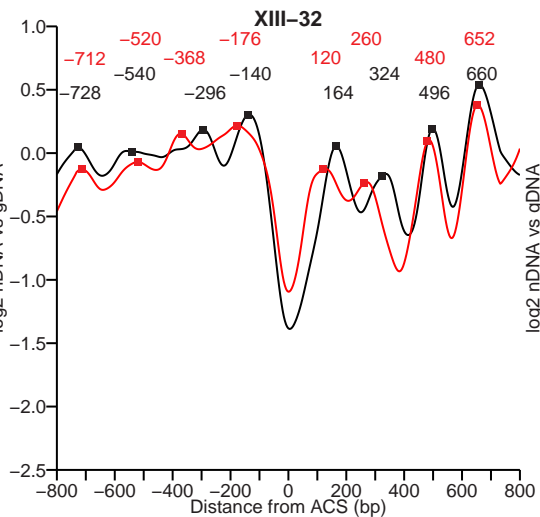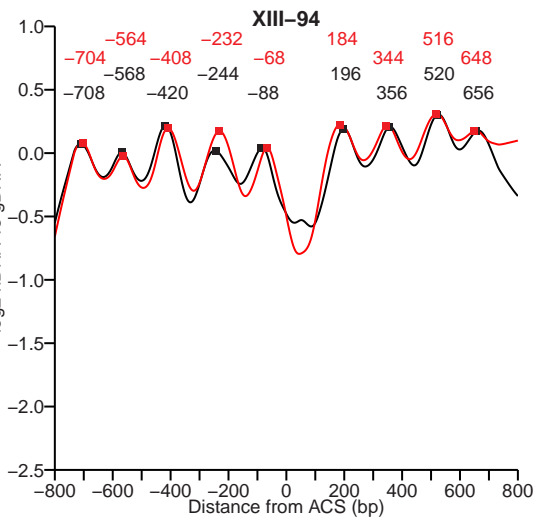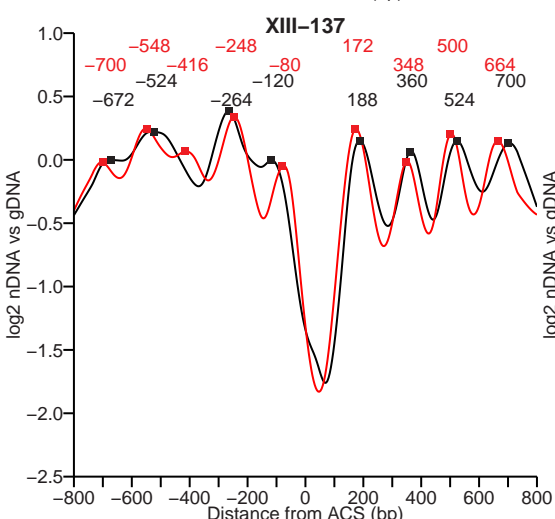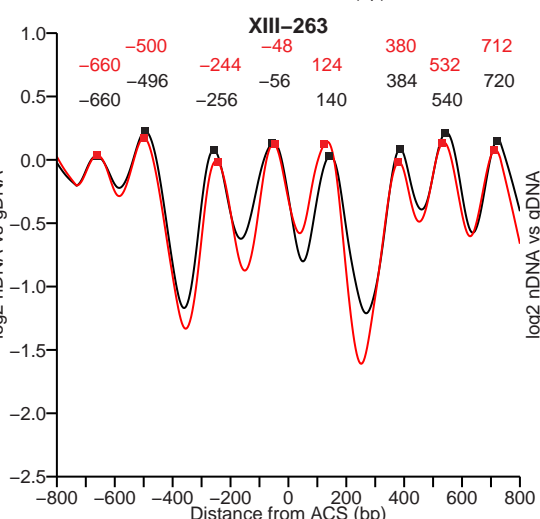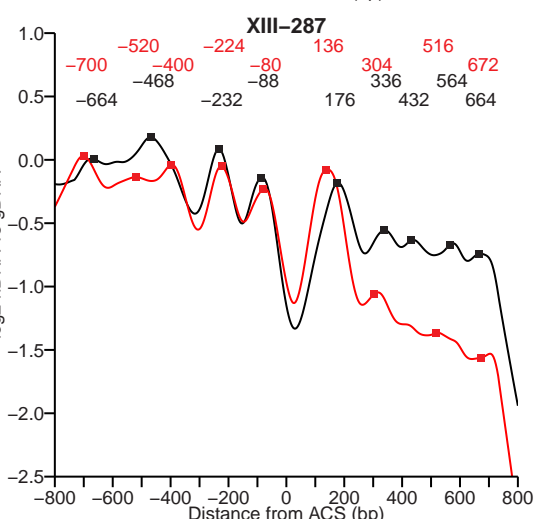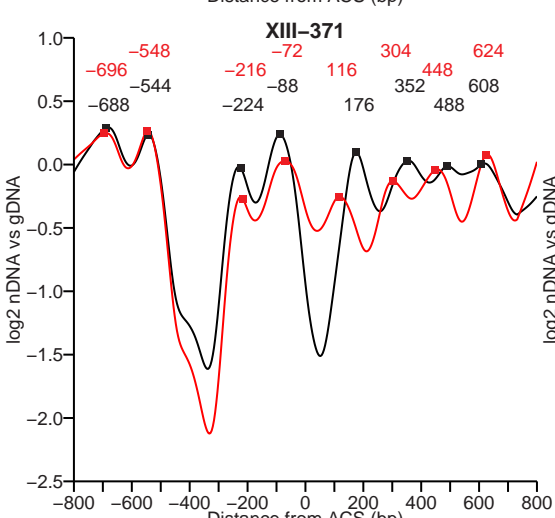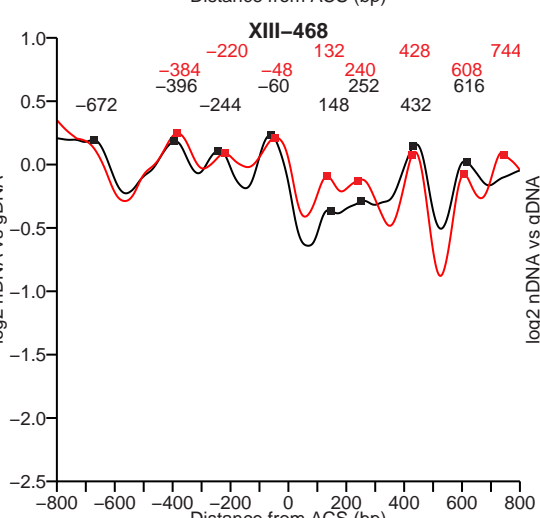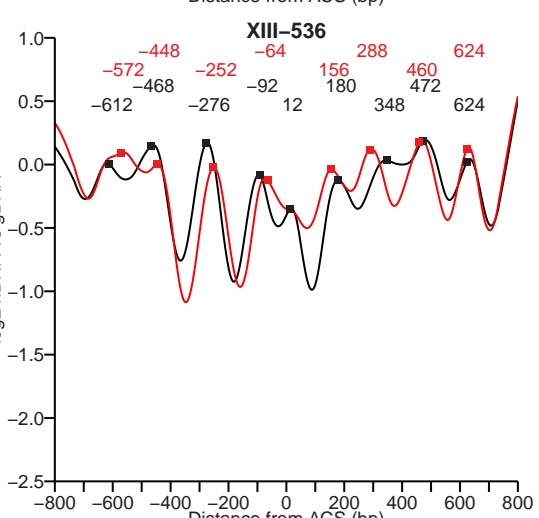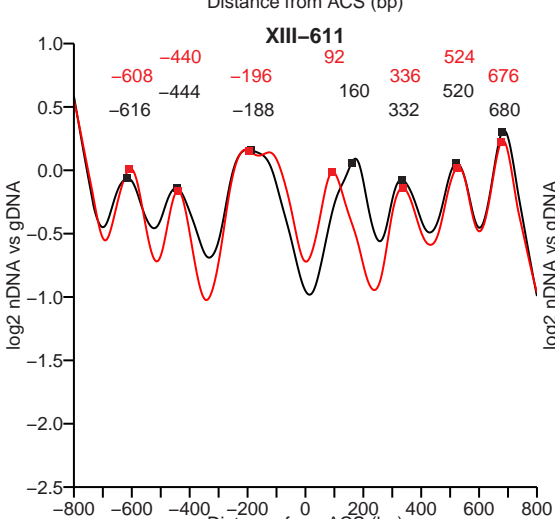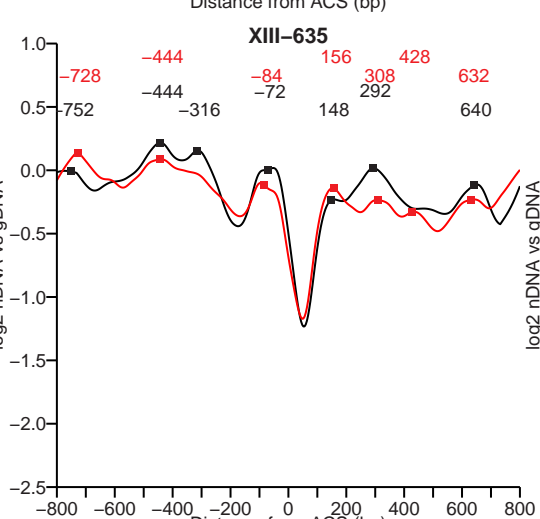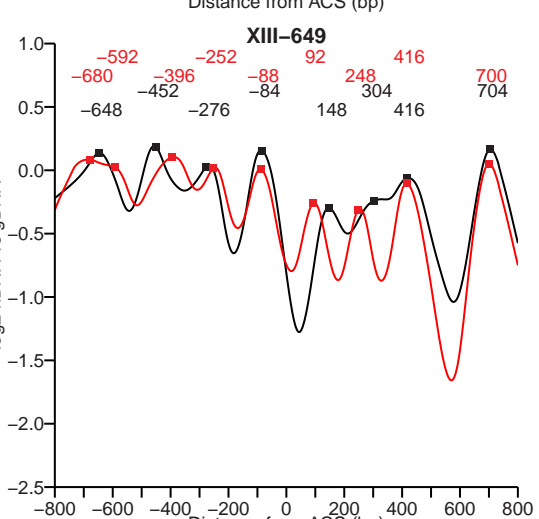

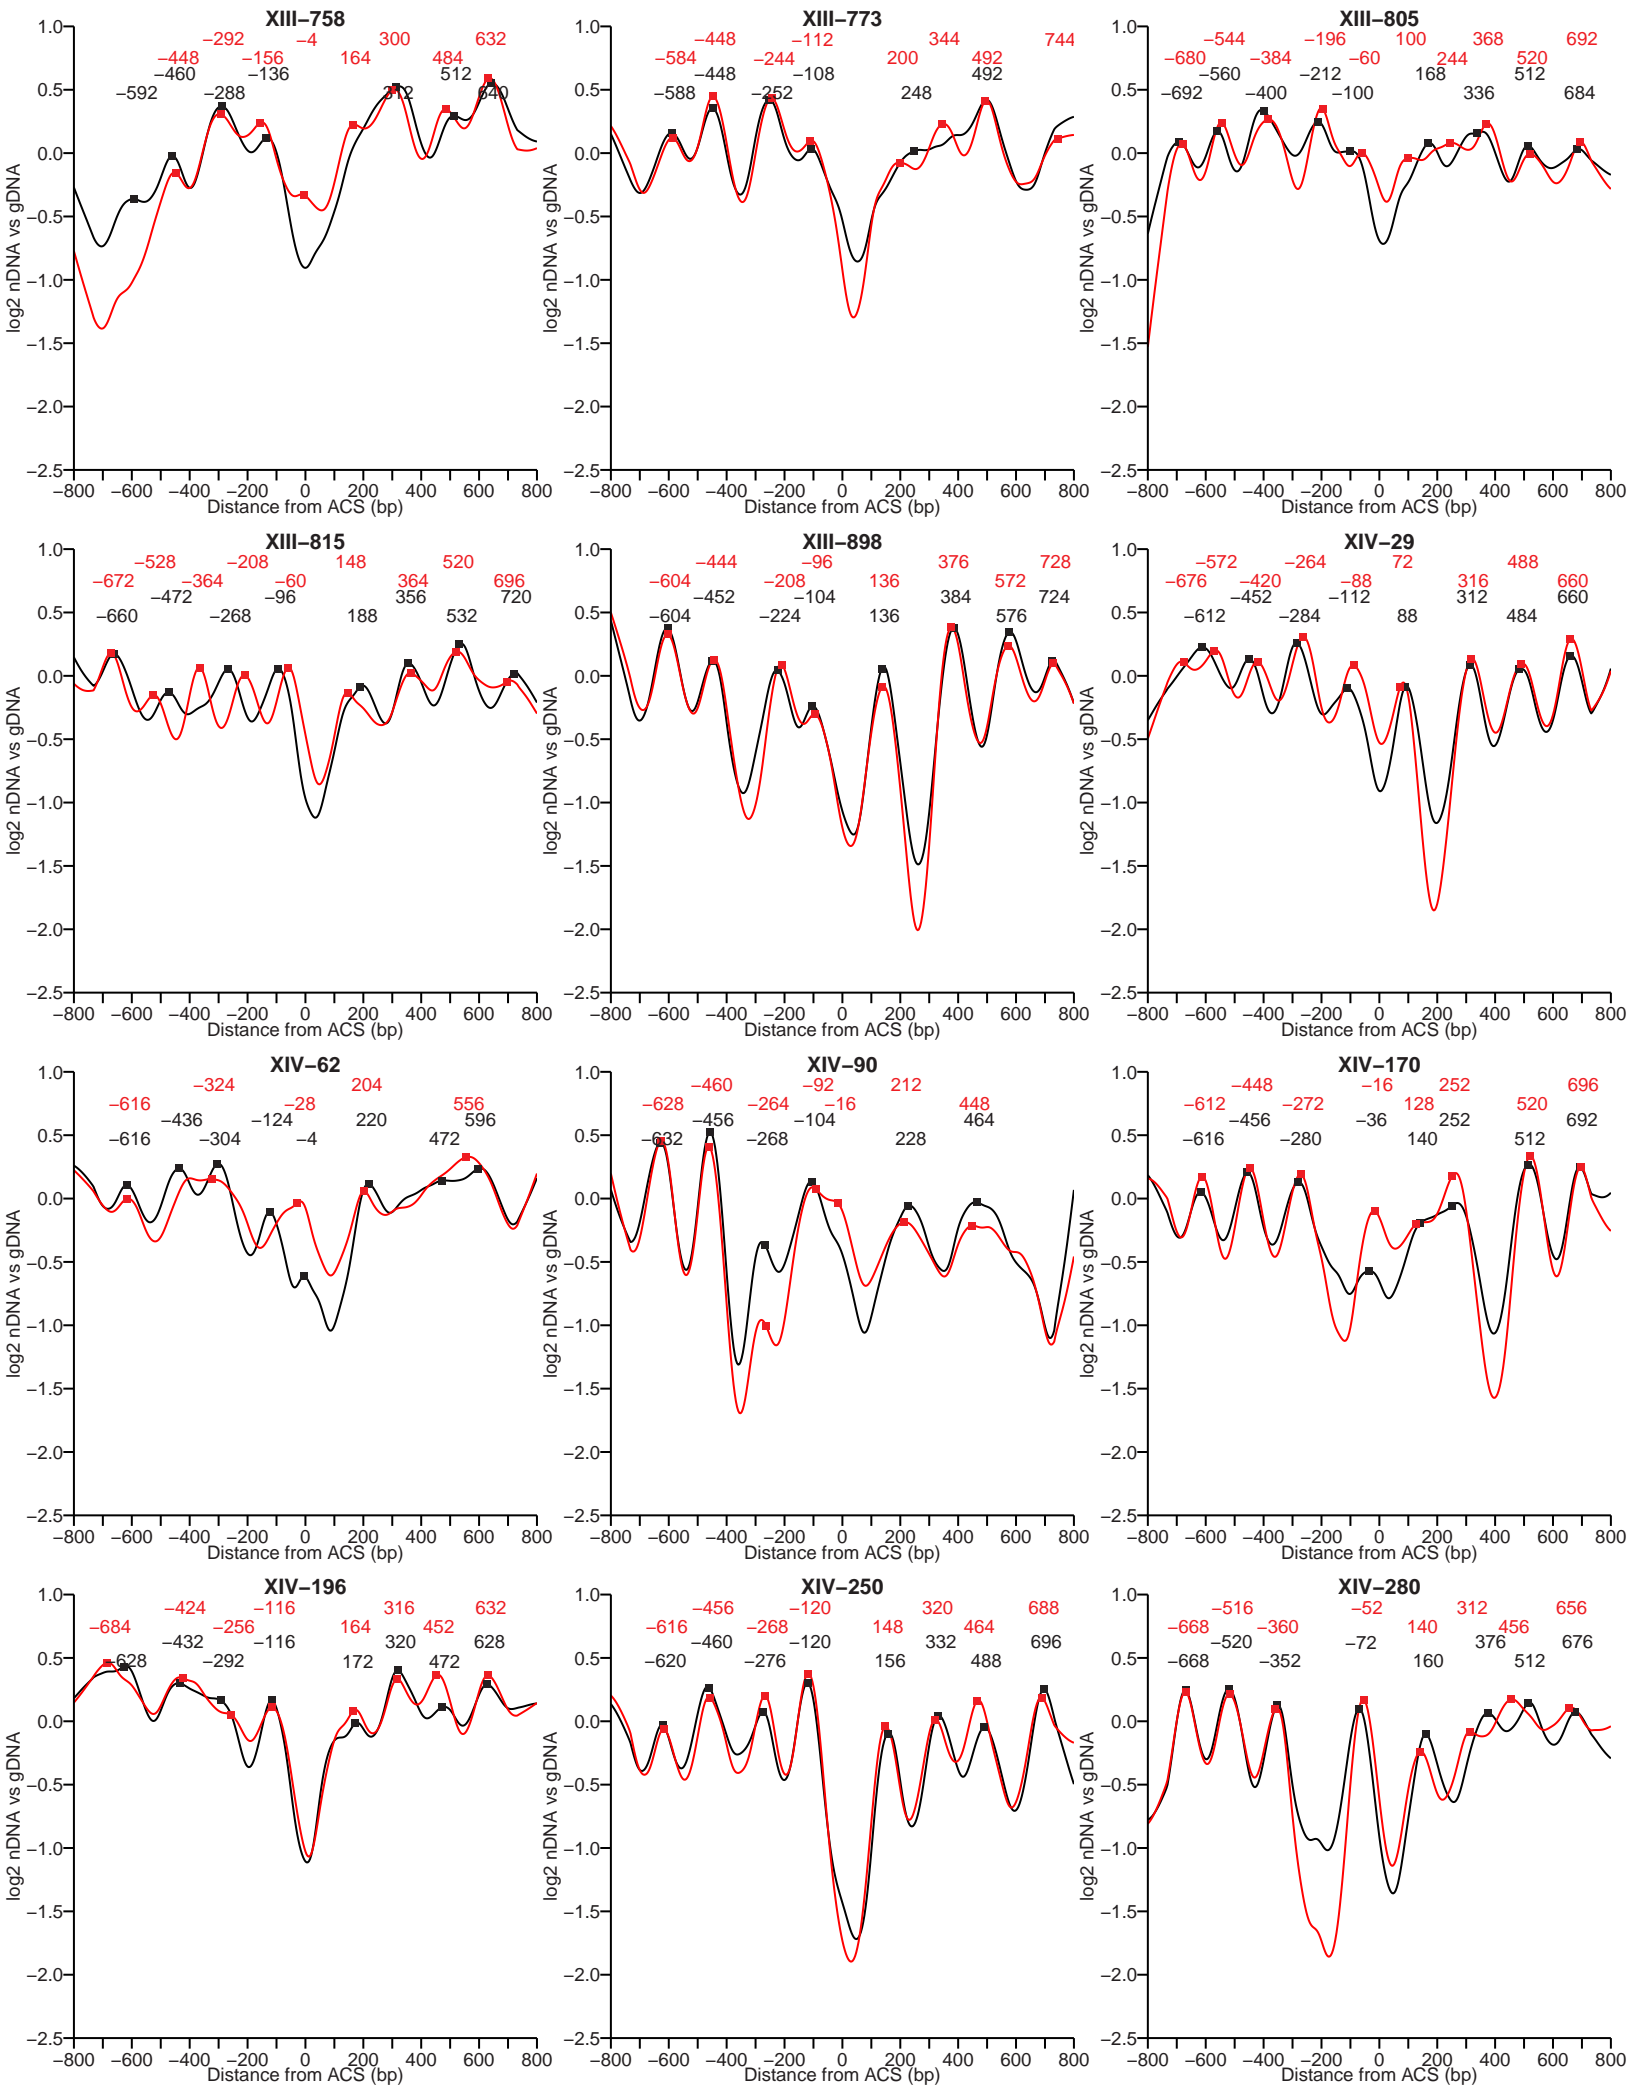

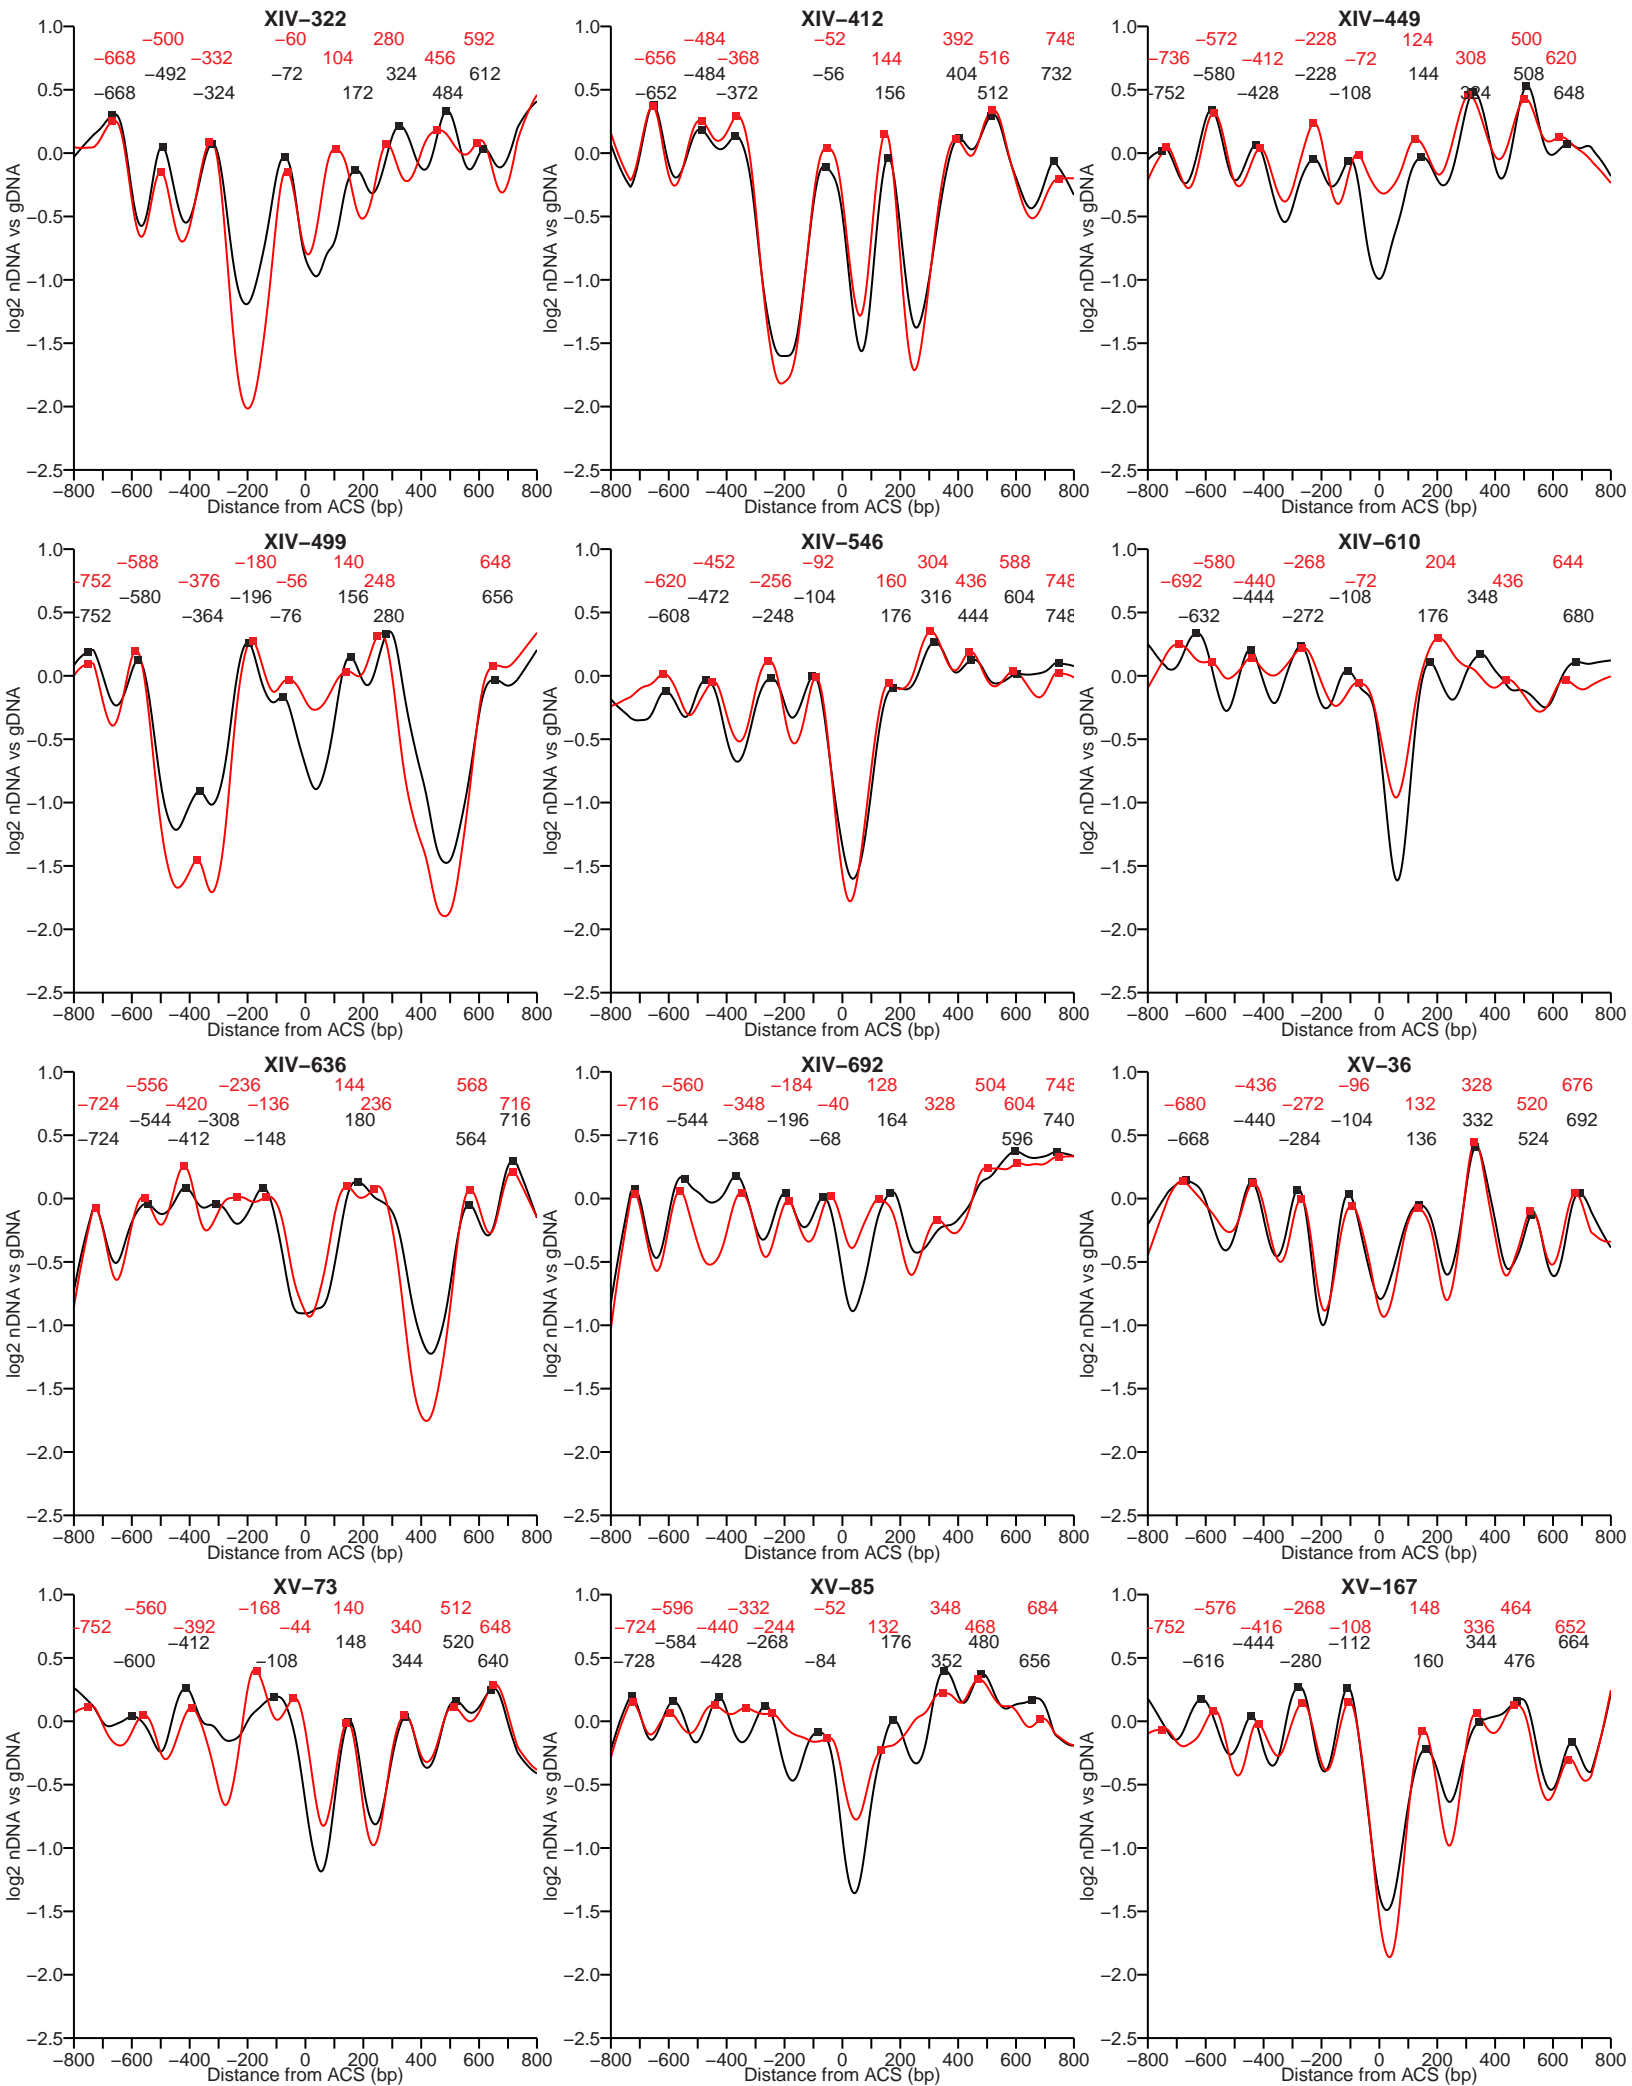



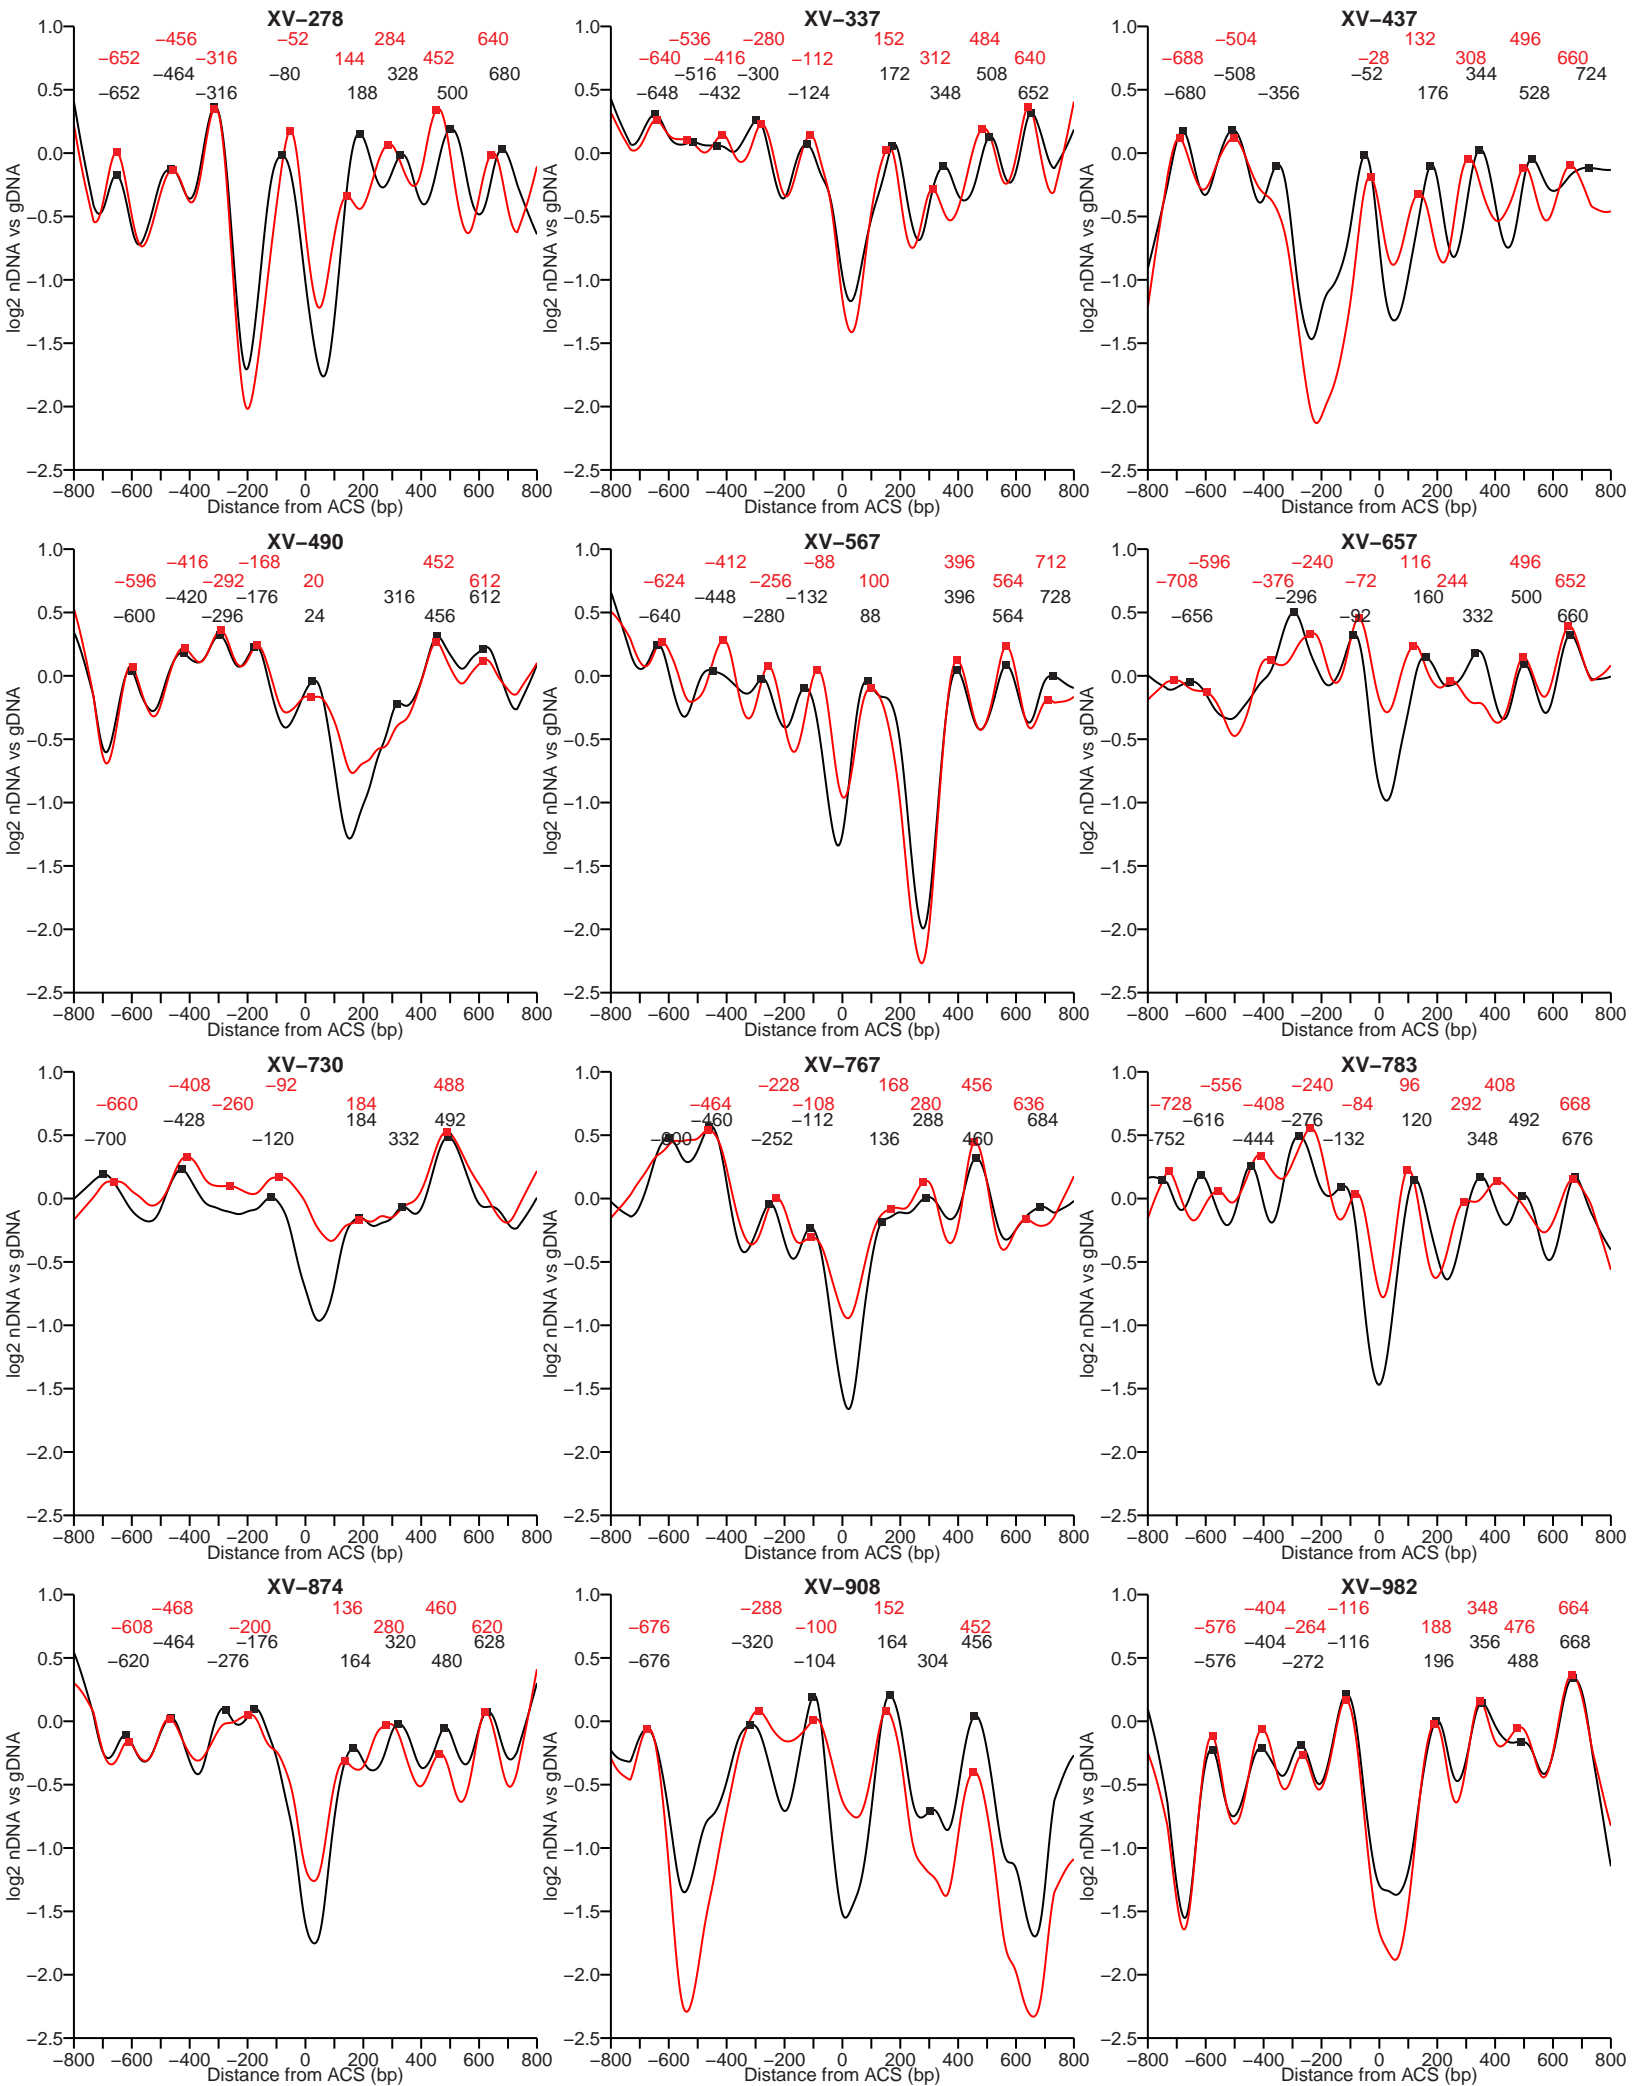

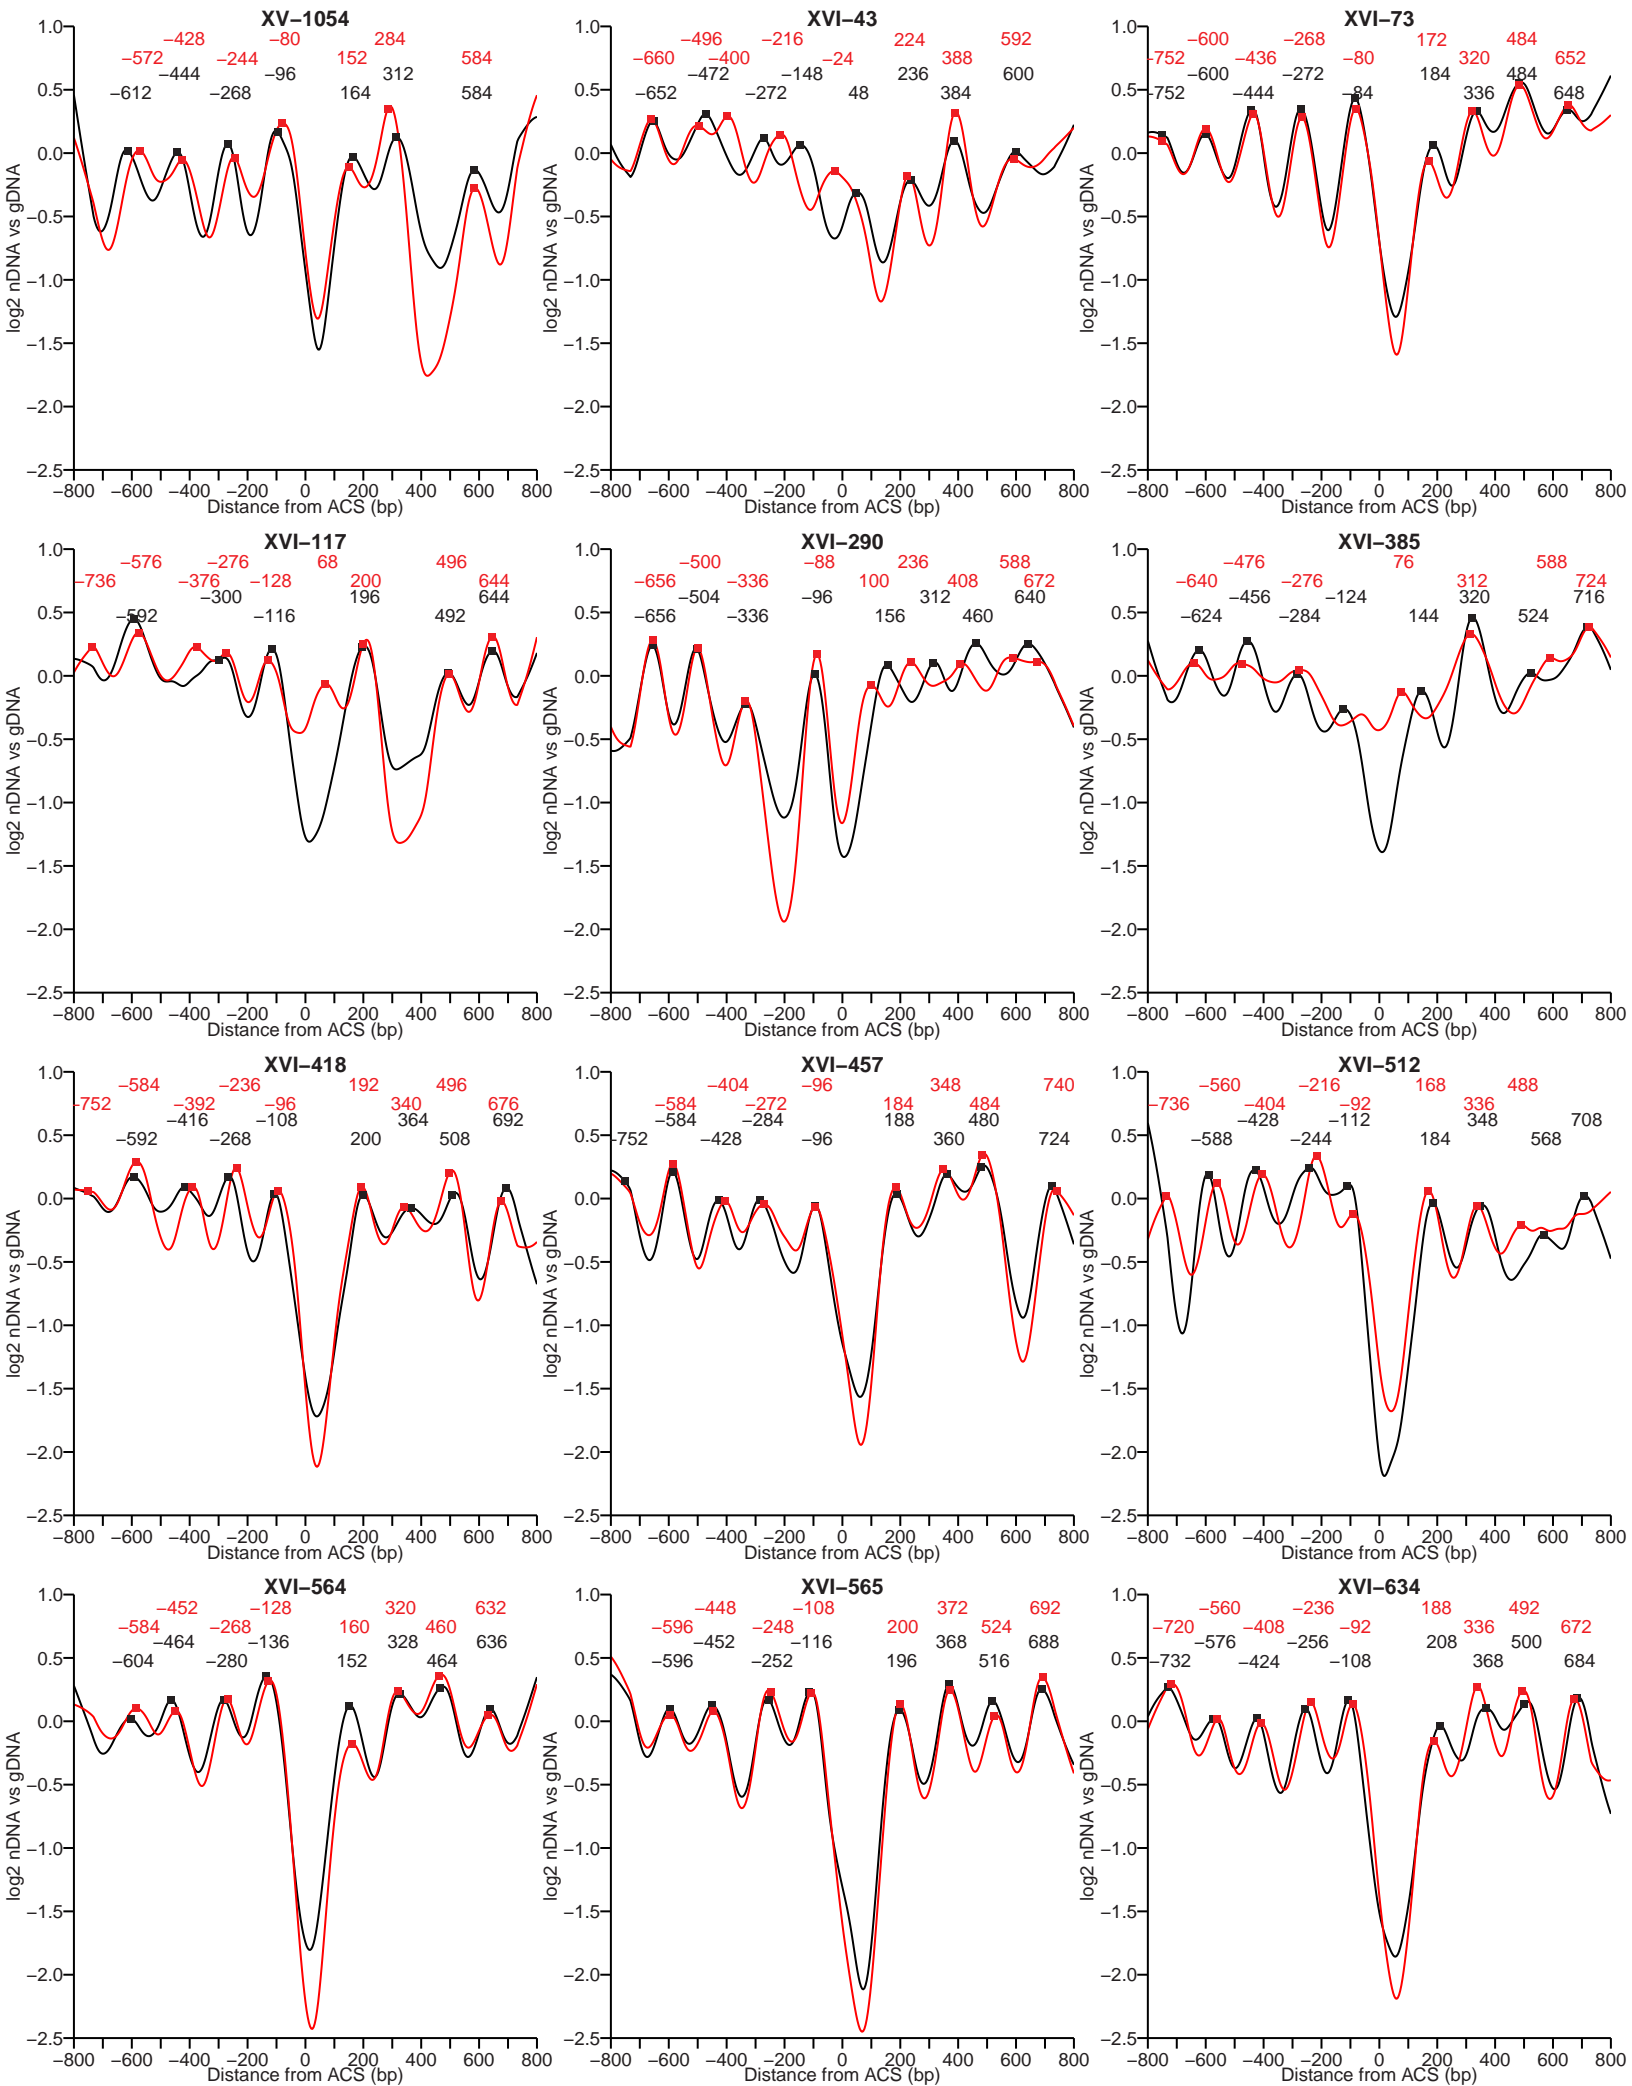

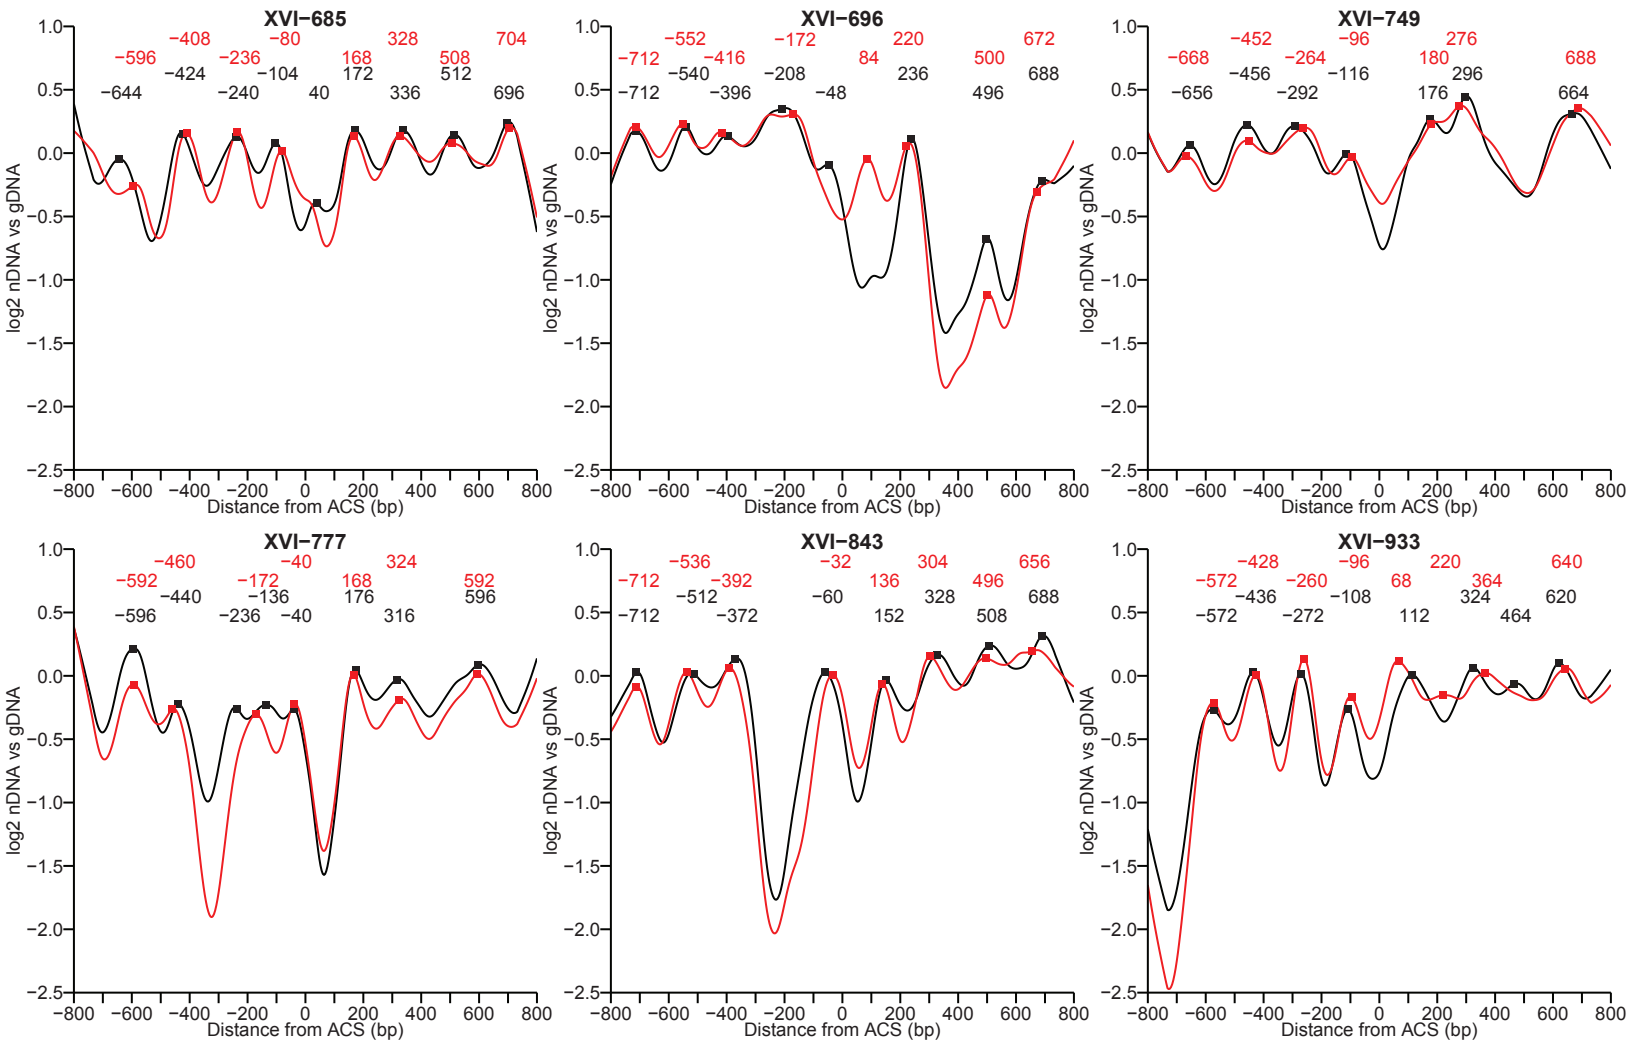

Figure S6. ACS-centered nucleosome profiles for each origin in *GAL:orc2-1* (—) and the wild-type control (—) datasets. Individual origins were LOESS smoothed using a span which included 35 probes. The nucleosome calls for each origin in *GAL:orc2-1* are indicated (■) and their nucleosome locations are indicated with red text. The nucleosome calls for each origin in the wild-type control dataset (W303-1A) are indicated (■) and their nucleosome locations are indicated with black text. Origin names are based on the naming conventions of OriDB [9].
