# Supplementary material for: Diversity of Eukaryotic DNA Replication Origins Revealed by Genome-Wide Analysis of Chromatin Structure
Source: PubMed Central journal article supplement (PMC2932696; doi:10.1371/journal.pgen.1001092), 2010-09-02
Supplement: pgen.1001092.s007.pdf [file pgen.1001092.s007.pdf]

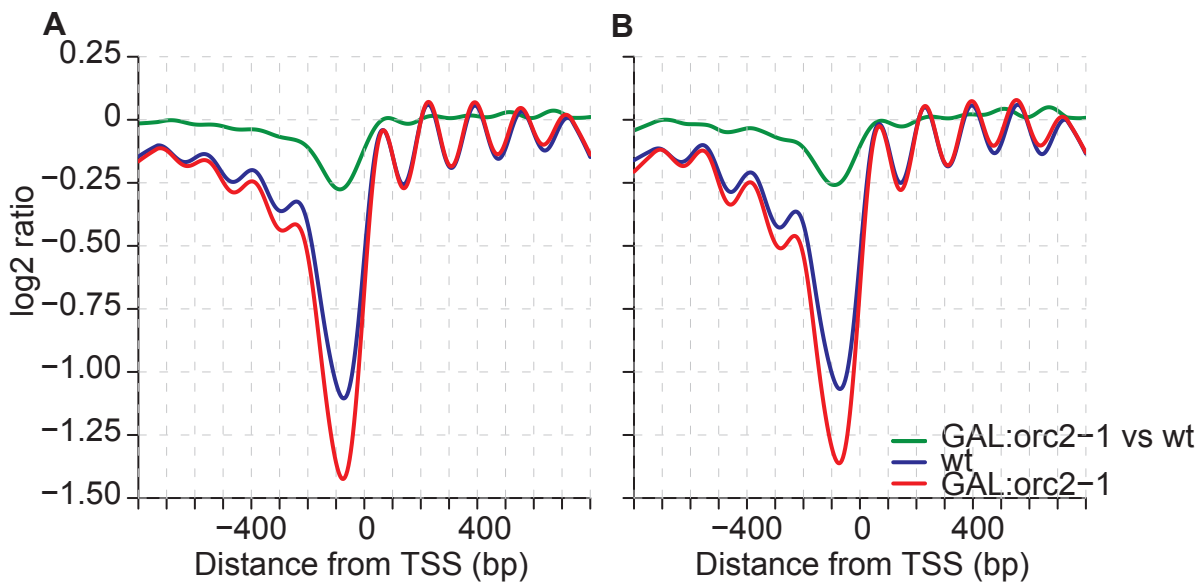

Figure S7. Average TSS centered profiles of the Orc2 depletion strain (—), the wild-type control strain (—) and the difference between the Orc2 depletion strain and the wild-type control strain (—). A. The average TSS profile for the complete dataset of 5015 genes. B. The average TSS profile for a random subset of 222 TSS profiles.
